# Supplementary material
Source: MDPI journal article supplement (https://www.mdpi.com/1996-1073/13/12/3161)
Supplement: s1 [file s1]

## Sheet: tofyfikat
		200°C
	nazwa próbki	20 min					nazwa próbki	40 min						nazwa próbki	60 min
osad ściekowy	200/20/o	48.3315	58.3327	10.0012	57.9525	0.3802	200/40/o	48.1049	58.1097	10.0048	57.2476	0.8621		200/60/o	48.1118	58.1155	10.0037	57.0985	1.017
poferment	200/20/p	48.7223	58.7231	10.0008	58.3514	0.3717	200/40/p	48.3338	58.3357	10.0019	52.2321	6.1036		200/60/p	48.3325	58.3407	10.0082	57.4578	0.8829
słoń	200/20/s	48.1178	58.121	10.0032	57.2632	0.8578	200/40/s	48.729	58.7309	10.0019	58.244	0.4869		200/60/s	51.9619	61.9624	10.0005	61.5217	0.4407
		220°C
	nazwa próbki	20 min					nazwa próbki	40 min						nazwa próbki	60 min
osad ściekowy	220/20/o	48.3325	58.3351	10.0026	57.332	1.0031	220/40/o	48.3348	58.3342	9.9994	57.1762	1.158		220/60/o	48.1052	58.1146	10.0094	56.8709	1.2437
poferment	220/20/p	48.1058	58.1091	10.0033	57.2413	0.8678	220/40/p	48.1075	58.1084	10.0009	56.8967	1.2117		220/60/p	48.3315	58.3349	10.0034	56.6063	1.7286
słoń	220/20/s	51.9647	61.9669	10.0022	61.5097	0.4572	220/40/s	51.9626	61.9712	10.0086	61.2865	0.6847		220/60/s	51.9626	61.9643	10.0017	61.0071	0.9572
		240°C
	nazwa próbki	20 min					nazwa próbki	40 min						nazwa próbki	60 min
osad ściekowy	240/20/o	51.9624	62.1334	10.171	61.5539	0.5795	240/40/o	48.1068	58.1188	10.012	57.2972	0.8216		240/60/o	48.1044	58.9429	10.8385	57.3617	1.5812
poferment	240/20/p	48.1045	58.6987	10.5942	58.487	0.2117	240/40/p	51.9646	61.9708	10.0062	54.1725	7.7983		240/60/p	51.9632	62.08	10.1168	55.89	6.19
słoń	240/20/s	48.7289	58.8472	10.1183	58.6569	0.1903	240/40/s	48.3324	58.3459	10.0135	57.9432	0.4027		240/60/s	2.3844	12.477	10.0926	11.8509	0.6261
		260°C
	nazwa próbki	20 min					nazwa próbki	40 min						nazwa próbki	60 min
osad ściekowy	260/20/o	48.1063	58.1122	10.0059	57.2816	0.8306	260/40/o	48.1037	58.5284	10.4247	56.529	1.9994		260/60/o	48.3319	58.3483	10.0164	56.9464	1.4019
poferment	260/20/p	51.9622	61.967	10.0048	61.5075	0.4595	260/40/p	51.9609	62.0687	10.1078	55.6987	6.37		260/60/p	48.1054	58.1103	10.0049	56.1688	1.9415
słoń	260/20/s	48.3319	58.3726	10.0407	58.0784	0.2942	260/40/s	48.7287	58.848	10.1193	56.0201	2.8279		260/60/s	51.9682	61.9912	10.023	60.9903	1.0009
		280°C
	nazwa próbki	20 min					nazwa próbki	40 min						nazwa próbki	60 min
osad ściekowy	280/20/o	48.1048	58.1593	10.0545	56.6049	1.5544	280/40/o	51.9636	62.0882	10.1246	59.7086	2.3796	23.5032	280/60/o	48.1035	58.5777	10.4742	55.7104	2.8673
poferment	280/20/p	3.2095	13.2285	10.019	9.1519	4.0766	280/40/p	3.2046	13.6713	10.4667	8.2079	5.4634	52.1979	280/60/p	2.3843	12.1044	9.7201	6.5692	5.5352
słoń	280/20/s	51.9632	61.997	10.0338	59.1702	2.8268	280/40/s	48.105	58.1555	10.0505	53.4526	4.7029	46.7927	280/60/s	51.9632	61.9646	10.0014	58.2975	3.6671
		300°C
	nazwa próbki	20 min					nazwa próbki	40 min						nazwa próbki	60 min
osad ściekowy	300/20/o	48.1048	58.1254	10.0206	56.2586	1.8668	300/40/o	48.1067	58.5071	10.4004	55.9408	2.5663	24.675	300/60/o
poferment	300/20/p	3.2061	13.341	10.1349	8.8319	4.5091	300/40/p	2.3814	9.487	7.1056	6.0487	3.4383	48.3886	300/60/p
słoń	300/20/s	51.9641	61.9835	10.0194	58.3044	3.6791	300/40/s	51.9662	61.1198	9.1536	58.0605	3.0593	33.4218	300/60/s

## Sheet: Read me
This file contains data on the fuel properties of carbonized solid fuels (CSF) produced from sewage sludge and digestate. This ("read me") sheet is a guide on how to read the data with short information about each type of waste. The second spreadsheet ("Torrefaction process") contains data about the CSF mass yield - MY, energy densification ratio - EDr, and energy yield - EY of process. The third…
Data set contains 2 following materials:
1	Sewage sludge was collected at the 140,000 m3∙d-1 wastewater treatment plant (WWTP) (Janówek, MPWiK S.A., Wrocław, Poland). The SS was a by-product of mechanical and biological wastewater treatment, with chemical additives for phosphorus removal. The sample was collected from the secondary settling tank, before the anaerobic digestion.
2	Digestate originated from the 1 MWel commercial biogas plant (Bio-Wat Sp. Z o. o., Świdnica, Poland). The biogas plant used the following feedstocks: a biodegradable fraction of municipal solid waste (34%), maize silage (30%), sugar beet pulp (30%), and yeast cake (6%). The sample was collected from the post-fermentation chamber.

## Sheet: Torrefaction process
The table present values of the mass yield - MY, energy densification ratio - Edr, energy yield - EY of torrefied materials. Temperatures 200-300 °C with intervals 20 °C in residence time 20, 40 and 60 minutes were used. Analysis has been done in one replication for each material.
Temperature, °C	Time, min	Sewage sludge			Digestate
		MY, %	EDr, -	EY, %	MY, %	EDr, -	EY, %
200	20	96.1985	101.809	97.9391	96.2833	100.829	97.0818
200	40	95.6438	98.2934	94.0115	97.8642	100.684	98.5333
200	60	89.8338	100.059	89.8871	91.1782	103.784	94.628
220	20	89.9716	99.9406	89.9182	91.3249	103.092	94.149
220	40	88.4193	99.2164	87.7264	87.8841	104.377	91.7308
220	60	87.5747	97.9713	85.798	82.7199	105.826	87.5388
240	20	94.3024	100.635	94.9014	98.0017	99.8304	97.8356
240	40	87.6662	95.7826	83.9689	87.1404	102.37	89.2056
240	60	86.1489	98.3848	84.7574	84.3109	105.676	89.0966
260	20	91.6989	97.9987	89.8637	95.4072	100.886	96.2529
260	40	85.0205	96.2692	81.8486	60.2706	109.41	65.9421
260	60	83	97.2813	80.7435	80.5945	106.286	85.6609
280	20	84.5403	95.9105	81.083	59.3113	111.765	66.2895
280	40	76.4968	86.996	66.5492	47.8021	109.217	52.2078
280	60	72.6251	81.4512	59.154	43.0541	102.366	44.0729
300	20	81.3704	92.0975	74.9401	55.5092	108.426	60.1864
300	40	75.325	84.869	63.9275	51.6114	110.37	56.9636
300	60	74.9525	85.5132	64.0943	48.0031	104.583	50.2032

## Sheet: Proximate analysis
The table presents results from proximate analysis of material 'RAW' and torrefied material produced in particular conditions. MC - moisture content, OM - organic matter content, ash - ash content, and CP - combustible part content, HHV - high heatin value. Proximate analysis has been done in three replications for each material.
Temperature, °C	Time, min	Sewage sludge					Digestate
		MC, %	OM, %	CP, %	Ash, %	HHV, MJ∙kg-1	MC, %	OM, %	CP, %	Ash, %	HHV, MJ∙kg-1
Raw	Raw	-	62.26	63.81	35.79	14.833	-	86.3	87.55	12.85	18.135
Raw	Raw	-	61.34	63.4	37.21	14.485	-	86.24	87.73	11.97	18.046
Raw	Raw	-	62.1	63.89	35.9	14.453	-	86.96	87.52	12.38	18.08
200	20	4.45372	59.1406	61.3776	38.6224	14.976	5.00099	86.7925	97.2897	2.71031	18.263
200	20	4.30318	59.3153	61.4308	38.5692	14.808	4.93631	87.6244	88.6393	11.3607	18.329
200	20	4.25024	59.3317	61.3865	38.6135	14.779	4.7329	87.4227	88.4918	11.5082	18.119
200	40	1.24552	59.9031	62.0724	37.9276	14.414	2.00129	86.8154	87.9447	12.0553	19.073
200	40	1.36208	59.5669	61.6233	38.3767	14.273	1.89702	87.2928	88.4471	11.5529	18.039
200	40	1.23031	59.7708	61.8734	38.1266	14.337	1.79782	87.515	88.7255	11.2745	17.52
200	60	3.7572	56.8343	59.5315	40.4685	14.643	3.97592	86.6527	87.7177	12.2823	18.856
200	60	3.78555	57.2199	60.0359	39.9641	14.627	4.03754	86.8174	87.7954	12.2046	18.613
200	60	3.6751	57.423	59.9633	40.0367	14.527	3.79179	87.0314	88.1358	11.8642	18.845
220	20	3.53682	57.9596	60.4557	39.5443	14.891	3.31971	87.2551	88.2244	11.7756	18.784
220	20	3.54398	57.9694	60.3809	39.6191	14.373	3.24501	87.1487	88.0718	11.9282	18.489
220	20	3.5924	58.1338	60.4562	39.5438	14.481	3.42738	87.2338	88.1802	11.8198	18.666
220	40	3.67676	56.7291	59.16	40.84	14.474	3.62304	86.3429	87.06	12.94	18.717
220	40	3.65287	56.9691	59.3469	40.6531	14.428	3.50049	86.5498	87.2223	12.7777	18.97
220	40	3.60825	57.2193	59.439	40.561	14.526	3.61713	86.5879	87.236	12.764	18.949
220	60	3.2649	56.4344	58.4843	41.5157	14.176	3.54044	85.3908	86.2593	13.7407	19.172
220	60	3.35396	56.6722	59.2233	40.7767	14.218	3.49484	85.5247	86.4815	13.5185	19.117
220	60	3.38587	56.6365	58.8822	41.1178	14.489	3.23319	85.5454	86.2959	13.7041	19.133
240	20	3.93096	59.0716	61.3355	38.6645	14.782	4.21639	87.4169	88.2164	11.7836	18.095
240	20	3.99603	59.0271	61.196	38.804	14.701	4.10548	87.3542	88.1771	11.8229	18.319
240	20	3.90609	58.9666	61.0978	38.9022	14.566	4.16418	87.4313	88.1572	11.8428	17.755
240	40	1.31527	56.0582	58.1381	41.8619	14.414	1.97362	85.6941	86.8575	13.1425	18.726
240	40	1.38806	56.2136	58.5763	41.4237	13.641	2.00279	85.8465	87.0463	12.9537	18.622
240	40	1.39762	56.0494	58.3578	41.6422	13.87	1.77615	85.544	86.6653	13.3347	18.199
240	60	0.811399	55.2075	57.9409	42.0591	14.552	1.40076	83.7481	84.9874	15.0126	19.094
240	60	0.904888	55.5434	58.3623	41.6377	14.112	1.27604	84.3886	85.6912	14.3088	19.195
240	60	0.897219	55.246	57.9117	42.0883	14.4	1.41745	85.7128	86.857	13.143	19.052
260	20	3.4435	58.1574	60.289	39.711	14.222	1.63755	54.1721	54.1318	45.8682	18.116
260	20	3.62875	58.167	60.2669	39.7331	14.381	1.88361	58.8764	58.8764	41.1236	18.142
260	20	3.23762	58.3853	60.4932	39.5068	14.292	1.89281	55.9809	56.052	43.948	18.484
260	40	1.22988	54.1709	57.0561	42.9439	13.895	2.26344	80.1877	81.5344	18.4656	19.76
260	40	1.11859	54.6401	57.313	42.687	13.933	2.28833	80.277	81.6617	18.3383	19.88
260	40	1.14943	56.666	59.3324	40.6676	14.31	2.34005	80.184	81.4983	18.5017	19.727
260	60	2.44535	55.9955	58.2157	41.7843	14.22	2.98033	84.5894	85.7874	14.2126	19.165
260	60	2.50572	56.0224	58.307	41.693	14.158	2.89367	85.0495	86.1925	13.8075	19.195
260	60	2.49826	55.7677	57.942	42.058	14.203	2.94794	85.07	86.182	13.818	19.312
280	20	2.44942	53.9189	56.4603	43.5397	14.059	4.00279	80.6763	81.7965	18.2035	20.397
280	20	2.32581	54.452	56.935	43.065	13.969	4.05959	80.9693	82.1991	17.8009	20.373
280	20	2.38735	54.1628	56.6595	43.3405	13.953	3.929	81.0359	82.2088	17.7912	19.875
280	40	2.71674	49.8871	52.2485	47.7515	12.737	4.64977	75.5546	77.2708	22.7292	20.022
280	40	2.666	49.7743	52.3287	47.6713	13.085	4.76952	76.008	77.457	22.543	19.847
280	40	2.58638	49.6053	52.1989	47.8011	12.257	4.60848	74.7882	76.2836	23.7164	19.393
280	60	3.40864	46.8385	49.4256	50.5744	11.51	4.15253	71.8392	73.4014	26.5986	18.656
280	60	3.04482	47.2817	50.0206	49.9794	12.196	4.30751	73.0228	74.69	25.31	18.384
280	60	2.80775	47.6097	50.4266	49.5734	11.946	4.18734	71.0543	72.877	27.123	18.505
300	20	1.34969	52.1431	55.0804	44.9196	13.462	3.19107	78.0991	79.5652	20.4348	19.708
300	20	1.81747	51.9699	54.801	45.199	13.735	3.39296	78.2228	79.7424	20.2576	19.367
300	20	1.75302	51.8041	54.7185	45.2815	13.115	3.10375	78.5235	80.0691	19.9309	19.758
300	40	2.13583	48.9188	51.7248	48.2752	12.907	4.12752	76.806	78.0569	21.9431	19.946
300	40	2.06827	48.944	52.0812	47.9188	12.24	4.09263	77.3418	78.4659	21.5341	20.069
300	40	2.13731	49.1295	52.0346	47.9654	12.001	4.0223	76.2214	77.5652	22.4348	19.873
300	60	1.67671	48.0547	51.21	48.79	12.447	3.07769	74.4621	76.0033	23.9967	19.369
300	60	1.76661	48.1451	51.0636	48.9364	12.607	3.12969	74.1123	75.5884	24.4116	19.519
300	60	1.68912	47.9546	51.0022	48.9978	12.376	3.26653	75.1813	76.5693	23.4307	17.86

## Sheet: TGA - isothermal condition
The table presents the results of a thermogravimetric analysis performed in isothermal conditions. The materials sample 2.25 g was placed into a reactor in particular temperatures. The samples were heated by 1 h. Analysis has been done in three replications for each material at each temperature.
Time, s	Sewage sludge																		Digestate
	200°C	200°C	200°C	220°C	220°C	220°C	240°C	240°C	240°C	260°C	260°C	260°C	280°C	280°C	280°C	300°C	300°C	300°C	200°C	200°C	200°C	220°C	220°C	220°C	240°C	240°C	240°C	260°C	260°C	260°C	280°C	280°C	280°C	300°C	300°C	300°C
0	2.25	2.25	2.25	2.25	2.25	2.25	2.25	2.25	2.25	2.25	2.25	2.25	2.25	2.25	2.25	2.25	2.25	2.25	2.25	2.25	2.25	2.25	2.25	2.25	2.25	2.25	2.25	2.25	2.25	2.25	2.25	2.25	2.25	2.25	2.25	2.25
10	2.25	2.25	2.25	2.25	2.25	2.25	2.25	2.25	2.25	2.25	2.25	2.25	2.25	2.25	2.25	2.25	2.25	2.25	2.25	2.25	2.25	2.25	2.25	2.25	2.25	2.25	2.25	2.25	2.25	2.25	2.25	2.25	2.25	2.25	2.25	2.25
20	2.25	2.25	2.25	2.25	2.25	2.25	2.25	2.25	2.25	2.25	2.25	2.25	2.25	2.25	2.25	2.25	2.25	2.25	2.25	2.25	2.25	2.25	2.25	2.25	2.25	2.25	2.25	2.25	2.25	2.25	2.25	2.25	2.25	2.25	2.25	2.25
30	2.25	2.25	2.25	2.25	2.25	2.25	2.25	2.25	2.25	2.25	2.25	2.25	2.25	2.25	2.25	2.25	2.25	2.25	2.25	2.25	2.25	2.25	2.25	2.25	2.25	2.25	2.25	2.25	2.25	2.25	2.25	2.25	2.25	2.25	2.25	2.25
40	2.25	2.25	2.25	2.25	2.25	2.25	2.25	2.25	2.25	2.25	2.25	2.25	2.25	2.25	2.24	2.25	2.25	2.25	2.25	2.25	2.25	2.25	2.25	2.25	2.25	2.25	2.25	2.25	2.25	2.25	2.25	2.25	2.25	2.25	2.25	2.25
50	2.25	2.25	2.25	2.25	2.25	2.25	2.25	2.25	2.25	2.25	2.25	2.25	2.25	2.25	2.24	2.25	2.25	2.25	2.25	2.25	2.25	2.25	2.25	2.25	2.25	2.25	2.25	2.25	2.25	2.25	2.25	2.25	2.25	2.25	2.25	2.25
60	2.25	2.25	2.25	2.25	2.25	2.25	2.25	2.25	2.25	2.25	2.25	2.25	2.25	2.25	2.24	2.25	2.25	2.25	2.25	2.25	2.25	2.25	2.25	2.25	2.25	2.25	2.25	2.25	2.25	2.25	2.25	2.25	2.25	2.25	2.25	2.25
71	2.25	2.25	2.25	2.25	2.25	2.25	2.25	2.25	2.25	2.25	2.25	2.25	2.25	2.25	2.24	2.25	2.25	2.25	2.25	2.25	2.25	2.25	2.25	2.25	2.25	2.25	2.25	2.25	2.25	2.25	2.25	2.25	2.25	2.25	2.25	2.25
81	2.25	2.25	2.25	2.25	2.25	2.25	2.25	2.25	2.25	2.25	2.25	2.25	2.25	2.25	2.24	2.25	2.25	2.25	2.25	2.25	2.25	2.25	2.25	2.25	2.25	2.25	2.25	2.25	2.25	2.25	2.25	2.25	2.25	2.25	2.25	2.25
91	2.25	2.25	2.25	2.25	2.25	2.25	2.25	2.25	2.25	2.25	2.25	2.25	2.25	2.25	2.24	2.25	2.25	2.25	2.25	2.25	2.25	2.25	2.25	2.25	2.25	2.25	2.25	2.25	2.25	2.24	2.25	2.25	2.25	2.25	2.25	2.25
101	2.25	2.25	2.25	2.25	2.25	2.25	2.25	2.25	2.25	2.25	2.25	2.25	2.25	2.25	2.24	2.25	2.25	2.24	2.25	2.25	2.25	2.25	2.25	2.25	2.25	2.25	2.25	2.25	2.25	2.24	2.24	2.25	2.25	2.25	2.25	2.25
111	2.25	2.25	2.25	2.25	2.25	2.25	2.24	2.25	2.25	2.25	2.25	2.25	2.25	2.25	2.24	2.25	2.25	2.24	2.25	2.25	2.25	2.25	2.25	2.25	2.25	2.25	2.25	2.25	2.25	2.24	2.24	2.25	2.25	2.25	2.25	2.25
121	2.25	2.25	2.25	2.25	2.25	2.25	2.24	2.25	2.25	2.25	2.25	2.25	2.25	2.25	2.24	2.25	2.25	2.24	2.25	2.25	2.25	2.25	2.25	2.25	2.25	2.25	2.25	2.25	2.25	2.24	2.24	2.25	2.25	2.25	2.25	2.25
131	2.25	2.25	2.25	2.25	2.25	2.25	2.24	2.25	2.25	2.25	2.25	2.25	2.25	2.24	2.24	2.25	2.25	2.24	2.25	2.25	2.25	2.25	2.25	2.25	2.25	2.25	2.25	2.25	2.25	2.24	2.24	2.25	2.25	2.24	2.25	2.25
142	2.25	2.25	2.25	2.25	2.25	2.25	2.24	2.25	2.25	2.25	2.25	2.25	2.25	2.24	2.24	2.25	2.25	2.24	2.25	2.25	2.25	2.25	2.25	2.25	2.25	2.24	2.25	2.25	2.25	2.24	2.24	2.25	2.25	2.24	2.24	2.24
152	2.25	2.25	2.25	2.25	2.25	2.25	2.24	2.25	2.25	2.25	2.25	2.25	2.25	2.24	2.24	2.25	2.25	2.24	2.25	2.25	2.25	2.25	2.25	2.25	2.25	2.24	2.25	2.25	2.25	2.24	2.24	2.24	2.25	2.24	2.24	2.24
162	2.25	2.25	2.25	2.25	2.25	2.25	2.24	2.25	2.25	2.25	2.25	2.25	2.25	2.24	2.24	2.25	2.25	2.24	2.25	2.25	2.25	2.25	2.25	2.25	2.25	2.24	2.25	2.25	2.25	2.24	2.24	2.24	2.25	2.24	2.24	2.24
172	2.25	2.25	2.25	2.25	2.25	2.25	2.24	2.25	2.25	2.25	2.25	2.25	2.25	2.24	2.24	2.25	2.25	2.24	2.25	2.25	2.25	2.25	2.25	2.25	2.25	2.24	2.25	2.25	2.25	2.24	2.24	2.24	2.25	2.24	2.24	2.24
182	2.25	2.25	2.25	2.25	2.25	2.25	2.24	2.25	2.25	2.25	2.25	2.25	2.25	2.24	2.24	2.25	2.25	2.24	2.25	2.25	2.25	2.25	2.25	2.25	2.25	2.24	2.25	2.25	2.24	2.24	2.24	2.24	2.25	2.24	2.24	2.24
192	2.25	2.25	2.25	2.25	2.25	2.25	2.24	2.25	2.25	2.25	2.25	2.25	2.25	2.24	2.24	2.24	2.25	2.24	2.25	2.25	2.25	2.25	2.25	2.25	2.25	2.24	2.25	2.25	2.24	2.24	2.24	2.24	2.25	2.24	2.24	2.24
202	2.25	2.25	2.25	2.25	2.25	2.25	2.24	2.25	2.25	2.25	2.25	2.25	2.25	2.24	2.24	2.24	2.25	2.24	2.25	2.25	2.25	2.25	2.25	2.25	2.25	2.24	2.25	2.24	2.24	2.24	2.24	2.24	2.25	2.24	2.24	2.24
213	2.25	2.25	2.25	2.25	2.25	2.25	2.24	2.25	2.25	2.25	2.25	2.25	2.24	2.24	2.24	2.24	2.25	2.24	2.25	2.25	2.25	2.25	2.25	2.25	2.25	2.24	2.25	2.24	2.24	2.24	2.24	2.24	2.25	2.24	2.24	2.24
223	2.25	2.25	2.25	2.25	2.25	2.25	2.24	2.25	2.25	2.25	2.25	2.25	2.24	2.24	2.24	2.24	2.25	2.24	2.25	2.25	2.25	2.25	2.24	2.25	2.25	2.24	2.25	2.24	2.24	2.24	2.24	2.24	2.25	2.24	2.24	2.24
233	2.25	2.25	2.25	2.25	2.25	2.25	2.24	2.25	2.25	2.25	2.25	2.25	2.24	2.24	2.24	2.24	2.25	2.24	2.25	2.25	2.25	2.24	2.24	2.25	2.25	2.24	2.25	2.24	2.24	2.24	2.24	2.24	2.25	2.24	2.24	2.24
243	2.25	2.25	2.25	2.25	2.25	2.25	2.24	2.25	2.25	2.25	2.25	2.25	2.24	2.24	2.24	2.24	2.24	2.24	2.25	2.24	2.25	2.24	2.24	2.25	2.25	2.24	2.25	2.24	2.24	2.24	2.24	2.24	2.24	2.24	2.24	2.24
253	2.25	2.25	2.25	2.25	2.25	2.25	2.24	2.25	2.25	2.25	2.25	2.25	2.24	2.24	2.24	2.24	2.24	2.24	2.25	2.24	2.24	2.24	2.24	2.25	2.25	2.24	2.24	2.24	2.24	2.24	2.24	2.24	2.24	2.24	2.24	2.24
263	2.25	2.25	2.25	2.25	2.25	2.25	2.24	2.25	2.25	2.25	2.25	2.25	2.24	2.24	2.24	2.24	2.24	2.24	2.25	2.24	2.24	2.24	2.24	2.25	2.25	2.24	2.24	2.24	2.24	2.24	2.24	2.24	2.24	2.24	2.24	2.24
273	2.25	2.25	2.25	2.25	2.25	2.25	2.24	2.25	2.25	2.25	2.25	2.25	2.24	2.24	2.24	2.24	2.24	2.24	2.25	2.24	2.24	2.24	2.24	2.25	2.25	2.24	2.24	2.24	2.24	2.24	2.24	2.24	2.24	2.23	2.24	2.24
284	2.25	2.25	2.25	2.25	2.25	2.25	2.24	2.25	2.25	2.25	2.25	2.25	2.24	2.24	2.23	2.24	2.24	2.24	2.25	2.24	2.24	2.24	2.24	2.25	2.24	2.24	2.24	2.24	2.24	2.24	2.24	2.24	2.24	2.23	2.24	2.24
294	2.25	2.25	2.25	2.25	2.25	2.25	2.24	2.25	2.25	2.25	2.25	2.25	2.24	2.24	2.23	2.24	2.24	2.24	2.25	2.24	2.24	2.24	2.24	2.25	2.24	2.24	2.24	2.24	2.24	2.24	2.24	2.23	2.24	2.23	2.24	2.24
304	2.25	2.25	2.25	2.25	2.25	2.25	2.24	2.25	2.25	2.25	2.25	2.25	2.24	2.24	2.23	2.24	2.24	2.24	2.25	2.24	2.24	2.24	2.24	2.25	2.24	2.24	2.24	2.24	2.24	2.24	2.24	2.23	2.24	2.23	2.24	2.24
314	2.25	2.25	2.25	2.25	2.25	2.25	2.24	2.25	2.25	2.25	2.25	2.25	2.24	2.23	2.23	2.24	2.24	2.24	2.25	2.24	2.24	2.24	2.24	2.25	2.24	2.24	2.24	2.24	2.24	2.24	2.24	2.23	2.24	2.23	2.23	2.24
324	2.25	2.25	2.25	2.25	2.25	2.25	2.24	2.25	2.25	2.25	2.25	2.25	2.24	2.23	2.23	2.24	2.24	2.24	2.25	2.24	2.24	2.24	2.24	2.24	2.24	2.24	2.24	2.24	2.24	2.24	2.24	2.23	2.24	2.23	2.23	2.24
334	2.25	2.25	2.25	2.25	2.25	2.25	2.24	2.25	2.25	2.25	2.25	2.25	2.24	2.23	2.23	2.23	2.24	2.24	2.25	2.24	2.24	2.24	2.24	2.24	2.24	2.23	2.24	2.23	2.23	2.24	2.24	2.23	2.24	2.23	2.23	2.24
345	2.25	2.25	2.25	2.25	2.25	2.25	2.24	2.25	2.25	2.25	2.25	2.25	2.24	2.23	2.23	2.23	2.24	2.24	2.25	2.24	2.24	2.24	2.24	2.24	2.24	2.23	2.24	2.23	2.23	2.24	2.24	2.23	2.24	2.23	2.23	2.24
355	2.25	2.25	2.25	2.25	2.25	2.25	2.24	2.25	2.25	2.25	2.25	2.25	2.24	2.23	2.23	2.23	2.24	2.24	2.25	2.24	2.24	2.24	2.24	2.24	2.24	2.23	2.24	2.23	2.23	2.24	2.24	2.23	2.24	2.23	2.23	2.24
365	2.25	2.25	2.25	2.25	2.25	2.25	2.24	2.25	2.25	2.25	2.25	2.25	2.24	2.23	2.23	2.23	2.24	2.23	2.25	2.24	2.24	2.24	2.24	2.24	2.24	2.23	2.24	2.23	2.23	2.23	2.24	2.23	2.24	2.23	2.23	2.24
375	2.25	2.25	2.25	2.25	2.25	2.25	2.24	2.25	2.25	2.25	2.25	2.25	2.24	2.23	2.23	2.23	2.23	2.23	2.25	2.24	2.24	2.24	2.24	2.24	2.24	2.23	2.24	2.23	2.23	2.23	2.24	2.23	2.24	2.23	2.23	2.24
385	2.25	2.25	2.25	2.25	2.25	2.25	2.24	2.25	2.25	2.25	2.25	2.25	2.24	2.23	2.23	2.23	2.23	2.23	2.25	2.24	2.24	2.24	2.24	2.24	2.24	2.23	2.24	2.23	2.23	2.23	2.24	2.23	2.24	2.23	2.23	2.24
395	2.25	2.25	2.25	2.25	2.25	2.25	2.24	2.25	2.25	2.25	2.25	2.24	2.24	2.23	2.23	2.23	2.23	2.23	2.25	2.24	2.24	2.24	2.24	2.24	2.24	2.23	2.24	2.23	2.23	2.23	2.24	2.23	2.23	2.23	2.23	2.24
405	2.25	2.25	2.25	2.25	2.24	2.25	2.24	2.25	2.25	2.25	2.25	2.24	2.24	2.23	2.23	2.23	2.23	2.23	2.25	2.24	2.24	2.24	2.24	2.24	2.24	2.23	2.24	2.23	2.23	2.23	2.24	2.23	2.23	2.22	2.23	2.24
416	2.25	2.25	2.25	2.25	2.24	2.25	2.24	2.25	2.25	2.25	2.25	2.24	2.23	2.23	2.23	2.23	2.23	2.23	2.25	2.24	2.24	2.24	2.24	2.24	2.24	2.23	2.24	2.23	2.23	2.23	2.24	2.23	2.23	2.22	2.23	2.24
426	2.25	2.25	2.25	2.25	2.24	2.25	2.24	2.25	2.25	2.25	2.25	2.24	2.23	2.23	2.23	2.22	2.23	2.23	2.25	2.24	2.24	2.24	2.24	2.24	2.24	2.23	2.24	2.23	2.23	2.23	2.24	2.22	2.23	2.22	2.23	2.24
436	2.25	2.25	2.25	2.25	2.24	2.25	2.24	2.25	2.25	2.25	2.25	2.24	2.23	2.23	2.23	2.22	2.23	2.23	2.25	2.24	2.24	2.24	2.24	2.24	2.24	2.23	2.23	2.23	2.23	2.23	2.24	2.22	2.23	2.22	2.23	2.24
446	2.25	2.25	2.25	2.25	2.24	2.25	2.24	2.25	2.25	2.24	2.24	2.24	2.23	2.22	2.22	2.22	2.23	2.23	2.25	2.24	2.24	2.24	2.24	2.24	2.24	2.23	2.23	2.23	2.23	2.23	2.24	2.22	2.23	2.22	2.23	2.24
456	2.25	2.25	2.25	2.25	2.24	2.25	2.24	2.25	2.25	2.24	2.24	2.24	2.23	2.22	2.22	2.22	2.23	2.23	2.25	2.24	2.24	2.24	2.24	2.24	2.24	2.23	2.23	2.23	2.23	2.23	2.24	2.22	2.23	2.22	2.22	2.24
466	2.25	2.25	2.25	2.25	2.24	2.25	2.24	2.25	2.25	2.24	2.24	2.24	2.23	2.22	2.22	2.22	2.22	2.23	2.25	2.24	2.24	2.24	2.24	2.24	2.24	2.23	2.23	2.23	2.23	2.23	2.24	2.22	2.23	2.22	2.22	2.24
476	2.25	2.25	2.25	2.25	2.24	2.25	2.24	2.25	2.25	2.24	2.24	2.24	2.23	2.22	2.22	2.22	2.22	2.23	2.25	2.24	2.24	2.24	2.23	2.24	2.24	2.23	2.23	2.22	2.22	2.23	2.24	2.22	2.23	2.22	2.22	2.24
487	2.25	2.25	2.25	2.25	2.24	2.25	2.23	2.25	2.24	2.24	2.24	2.24	2.23	2.22	2.22	2.22	2.22	2.22	2.25	2.24	2.24	2.24	2.23	2.24	2.24	2.23	2.23	2.22	2.22	2.23	2.24	2.22	2.23	2.22	2.22	2.24
497	2.25	2.24	2.25	2.25	2.24	2.25	2.23	2.25	2.24	2.24	2.24	2.24	2.23	2.22	2.22	2.21	2.22	2.22	2.25	2.24	2.24	2.24	2.23	2.24	2.23	2.23	2.23	2.22	2.22	2.23	2.24	2.22	2.23	2.22	2.22	2.23
507	2.25	2.24	2.25	2.25	2.24	2.25	2.23	2.25	2.24	2.24	2.24	2.24	2.23	2.22	2.22	2.21	2.22	2.22	2.25	2.24	2.24	2.24	2.23	2.24	2.23	2.23	2.23	2.22	2.22	2.23	2.24	2.22	2.23	2.22	2.22	2.23
517	2.25	2.24	2.25	2.25	2.24	2.25	2.23	2.25	2.24	2.24	2.24	2.24	2.23	2.22	2.22	2.21	2.22	2.22	2.25	2.24	2.24	2.23	2.23	2.24	2.23	2.23	2.23	2.22	2.22	2.23	2.24	2.22	2.23	2.22	2.22	2.23
527	2.25	2.24	2.25	2.25	2.24	2.25	2.23	2.25	2.24	2.24	2.24	2.24	2.23	2.22	2.22	2.21	2.22	2.22	2.25	2.23	2.24	2.23	2.23	2.24	2.23	2.22	2.23	2.22	2.22	2.23	2.24	2.22	2.23	2.21	2.22	2.23
537	2.25	2.24	2.25	2.25	2.24	2.25	2.23	2.25	2.24	2.24	2.24	2.24	2.22	2.21	2.22	2.21	2.21	2.22	2.25	2.23	2.24	2.23	2.23	2.24	2.23	2.22	2.23	2.22	2.22	2.23	2.24	2.22	2.23	2.21	2.22	2.23
547	2.25	2.24	2.25	2.25	2.24	2.25	2.23	2.25	2.24	2.24	2.24	2.24	2.22	2.21	2.22	2.2	2.21	2.22	2.25	2.23	2.24	2.23	2.23	2.24	2.23	2.22	2.23	2.22	2.22	2.23	2.24	2.22	2.23	2.21	2.22	2.23
558	2.25	2.24	2.25	2.25	2.24	2.25	2.23	2.25	2.24	2.24	2.24	2.24	2.22	2.21	2.21	2.2	2.21	2.21	2.25	2.23	2.24	2.23	2.23	2.24	2.23	2.22	2.23	2.22	2.22	2.23	2.24	2.22	2.23	2.21	2.22	2.23
568	2.25	2.24	2.25	2.25	2.24	2.25	2.23	2.25	2.24	2.24	2.24	2.24	2.22	2.21	2.21	2.2	2.21	2.21	2.25	2.23	2.24	2.23	2.23	2.24	2.23	2.22	2.23	2.22	2.22	2.23	2.24	2.22	2.22	2.21	2.22	2.23
578	2.25	2.24	2.25	2.25	2.24	2.25	2.23	2.25	2.24	2.24	2.24	2.24	2.22	2.21	2.21	2.2	2.21	2.21	2.25	2.23	2.24	2.23	2.23	2.24	2.23	2.22	2.23	2.22	2.22	2.23	2.24	2.21	2.22	2.21	2.22	2.23
588	2.25	2.24	2.25	2.25	2.24	2.25	2.23	2.25	2.24	2.24	2.24	2.24	2.22	2.21	2.21	2.2	2.21	2.21	2.25	2.23	2.23	2.23	2.23	2.23	2.23	2.22	2.23	2.22	2.22	2.23	2.24	2.21	2.22	2.21	2.21	2.23
598	2.25	2.24	2.25	2.24	2.24	2.25	2.23	2.25	2.24	2.24	2.24	2.24	2.22	2.21	2.21	2.2	2.2	2.21	2.25	2.23	2.23	2.23	2.23	2.23	2.23	2.22	2.23	2.22	2.22	2.23	2.24	2.21	2.22	2.21	2.21	2.23
608	2.25	2.24	2.25	2.24	2.24	2.25	2.23	2.25	2.24	2.24	2.24	2.24	2.22	2.21	2.21	2.19	2.2	2.21	2.25	2.23	2.23	2.23	2.23	2.23	2.23	2.22	2.23	2.22	2.22	2.23	2.24	2.21	2.22	2.21	2.21	2.23
618	2.25	2.24	2.25	2.24	2.24	2.25	2.23	2.25	2.24	2.24	2.24	2.24	2.22	2.2	2.21	2.19	2.2	2.2	2.25	2.23	2.23	2.23	2.23	2.23	2.23	2.22	2.23	2.22	2.22	2.23	2.24	2.21	2.22	2.21	2.21	2.23
629	2.25	2.24	2.25	2.24	2.24	2.25	2.23	2.25	2.24	2.24	2.24	2.24	2.21	2.2	2.21	2.19	2.2	2.2	2.25	2.23	2.23	2.23	2.23	2.23	2.23	2.22	2.23	2.22	2.22	2.23	2.24	2.21	2.22	2.21	2.21	2.23
639	2.25	2.24	2.25	2.24	2.24	2.25	2.23	2.25	2.24	2.24	2.24	2.24	2.21	2.2	2.21	2.19	2.2	2.2	2.25	2.23	2.23	2.23	2.23	2.23	2.23	2.22	2.23	2.22	2.22	2.23	2.24	2.21	2.22	2.2	2.21	2.23
649	2.25	2.24	2.25	2.24	2.24	2.25	2.23	2.25	2.24	2.24	2.24	2.24	2.21	2.2	2.2	2.19	2.2	2.2	2.25	2.23	2.23	2.23	2.23	2.23	2.23	2.22	2.22	2.21	2.21	2.22	2.24	2.21	2.22	2.2	2.21	2.23
659	2.25	2.24	2.25	2.24	2.24	2.25	2.23	2.25	2.24	2.24	2.24	2.24	2.21	2.2	2.2	2.18	2.19	2.2	2.25	2.23	2.23	2.23	2.23	2.23	2.23	2.22	2.22	2.21	2.21	2.22	2.24	2.21	2.22	2.2	2.21	2.23
669	2.25	2.24	2.25	2.24	2.24	2.25	2.23	2.25	2.24	2.24	2.24	2.24	2.21	2.2	2.2	2.18	2.19	2.19	2.25	2.23	2.23	2.23	2.23	2.23	2.23	2.22	2.22	2.21	2.21	2.22	2.24	2.21	2.22	2.2	2.21	2.22
679	2.25	2.24	2.25	2.24	2.24	2.25	2.23	2.25	2.24	2.24	2.24	2.24	2.21	2.2	2.2	2.18	2.19	2.19	2.25	2.23	2.23	2.23	2.23	2.23	2.23	2.22	2.22	2.21	2.21	2.22	2.24	2.21	2.22	2.2	2.21	2.22
689	2.25	2.24	2.24	2.24	2.24	2.25	2.23	2.25	2.24	2.24	2.24	2.23	2.21	2.2	2.2	2.18	2.19	2.19	2.25	2.23	2.23	2.23	2.23	2.23	2.23	2.22	2.22	2.21	2.21	2.22	2.24	2.21	2.22	2.2	2.21	2.22
700	2.25	2.24	2.24	2.24	2.24	2.25	2.23	2.25	2.24	2.24	2.24	2.23	2.2	2.19	2.2	2.18	2.19	2.19	2.25	2.23	2.23	2.23	2.23	2.23	2.23	2.22	2.22	2.21	2.21	2.22	2.24	2.21	2.22	2.2	2.2	2.22
710	2.25	2.24	2.24	2.24	2.24	2.25	2.23	2.25	2.24	2.24	2.23	2.23	2.2	2.19	2.2	2.17	2.18	2.19	2.25	2.23	2.23	2.23	2.23	2.23	2.23	2.22	2.22	2.21	2.21	2.22	2.24	2.21	2.22	2.2	2.2	2.22
720	2.25	2.24	2.24	2.24	2.24	2.25	2.23	2.25	2.24	2.23	2.23	2.23	2.2	2.19	2.2	2.17	2.18	2.19	2.25	2.23	2.23	2.23	2.23	2.23	2.23	2.22	2.22	2.21	2.21	2.22	2.24	2.21	2.22	2.2	2.2	2.22
730	2.25	2.24	2.24	2.24	2.24	2.25	2.23	2.25	2.24	2.23	2.23	2.23	2.2	2.19	2.19	2.17	2.18	2.18	2.25	2.23	2.23	2.23	2.23	2.23	2.23	2.22	2.22	2.21	2.21	2.22	2.24	2.21	2.21	2.2	2.2	2.22
740	2.25	2.24	2.24	2.24	2.24	2.25	2.23	2.25	2.24	2.23	2.23	2.23	2.2	2.19	2.19	2.17	2.18	2.18	2.25	2.23	2.23	2.23	2.23	2.23	2.23	2.22	2.22	2.21	2.21	2.22	2.24	2.2	2.21	2.19	2.2	2.22
750	2.25	2.24	2.24	2.24	2.24	2.25	2.23	2.25	2.24	2.23	2.23	2.23	2.2	2.19	2.19	2.17	2.18	2.18	2.25	2.23	2.23	2.23	2.23	2.23	2.23	2.22	2.22	2.21	2.21	2.22	2.24	2.2	2.21	2.19	2.2	2.22
760	2.25	2.24	2.24	2.24	2.24	2.25	2.23	2.25	2.24	2.23	2.23	2.23	2.2	2.19	2.19	2.17	2.18	2.18	2.25	2.23	2.23	2.23	2.23	2.23	2.23	2.22	2.22	2.21	2.21	2.22	2.24	2.2	2.21	2.19	2.2	2.21
771	2.25	2.24	2.24	2.24	2.24	2.25	2.23	2.25	2.24	2.23	2.23	2.23	2.19	2.18	2.19	2.16	2.17	2.18	2.25	2.23	2.23	2.23	2.23	2.23	2.23	2.22	2.22	2.21	2.21	2.22	2.24	2.2	2.21	2.19	2.2	2.21
781	2.25	2.24	2.24	2.24	2.24	2.25	2.22	2.25	2.24	2.23	2.23	2.23	2.19	2.18	2.19	2.16	2.17	2.18	2.25	2.23	2.23	2.23	2.23	2.23	2.23	2.22	2.22	2.21	2.21	2.22	2.24	2.2	2.21	2.19	2.2	2.21
791	2.25	2.24	2.24	2.24	2.24	2.25	2.22	2.25	2.24	2.23	2.23	2.23	2.19	2.18	2.19	2.16	2.17	2.17	2.25	2.23	2.23	2.23	2.23	2.23	2.23	2.22	2.22	2.21	2.21	2.22	2.24	2.2	2.21	2.19	2.2	2.21
801	2.25	2.24	2.24	2.24	2.24	2.25	2.22	2.25	2.24	2.23	2.23	2.23	2.19	2.18	2.19	2.16	2.17	2.17	2.25	2.23	2.23	2.23	2.22	2.23	2.23	2.21	2.22	2.21	2.21	2.22	2.24	2.2	2.21	2.19	2.19	2.21
811	2.25	2.24	2.24	2.24	2.24	2.25	2.22	2.25	2.24	2.23	2.23	2.23	2.19	2.18	2.18	2.16	2.17	2.17	2.25	2.23	2.23	2.23	2.22	2.23	2.23	2.21	2.22	2.21	2.21	2.22	2.24	2.2	2.21	2.19	2.19	2.21
821	2.25	2.24	2.24	2.24	2.24	2.25	2.22	2.25	2.24	2.23	2.23	2.23	2.19	2.18	2.18	2.15	2.17	2.17	2.25	2.23	2.23	2.23	2.22	2.23	2.23	2.21	2.22	2.21	2.21	2.22	2.24	2.2	2.21	2.19	2.19	2.21
831	2.25	2.24	2.24	2.24	2.24	2.25	2.22	2.25	2.24	2.23	2.23	2.23	2.19	2.18	2.18	2.15	2.16	2.17	2.25	2.23	2.23	2.23	2.22	2.23	2.22	2.21	2.22	2.21	2.21	2.22	2.24	2.2	2.21	2.18	2.19	2.21
842	2.25	2.24	2.24	2.24	2.24	2.25	2.22	2.25	2.24	2.23	2.23	2.23	2.19	2.17	2.18	2.15	2.16	2.17	2.25	2.23	2.23	2.23	2.22	2.23	2.22	2.21	2.22	2.21	2.21	2.22	2.24	2.2	2.21	2.18	2.19	2.2
852	2.25	2.24	2.24	2.24	2.24	2.25	2.22	2.25	2.24	2.23	2.23	2.22	2.18	2.17	2.18	2.15	2.16	2.16	2.25	2.23	2.23	2.23	2.22	2.23	2.22	2.21	2.22	2.2	2.21	2.22	2.23	2.2	2.21	2.18	2.19	2.2
862	2.25	2.24	2.24	2.24	2.24	2.25	2.22	2.25	2.24	2.23	2.23	2.22	2.18	2.17	2.18	2.15	2.16	2.16	2.25	2.22	2.23	2.23	2.22	2.23	2.22	2.21	2.22	2.2	2.21	2.22	2.23	2.2	2.21	2.18	2.19	2.2
872	2.25	2.24	2.24	2.24	2.24	2.25	2.22	2.25	2.24	2.22	2.22	2.22	2.18	2.17	2.18	2.15	2.16	2.16	2.25	2.22	2.23	2.22	2.22	2.23	2.22	2.21	2.22	2.2	2.21	2.22	2.23	2.2	2.21	2.18	2.19	2.2
882	2.25	2.24	2.24	2.24	2.24	2.25	2.22	2.25	2.24	2.22	2.22	2.22	2.18	2.17	2.17	2.14	2.16	2.16	2.25	2.22	2.23	2.22	2.22	2.23	2.22	2.21	2.22	2.2	2.21	2.22	2.23	2.2	2.21	2.18	2.19	2.2
892	2.25	2.24	2.24	2.24	2.24	2.25	2.22	2.25	2.24	2.22	2.22	2.22	2.18	2.17	2.17	2.14	2.15	2.16	2.25	2.22	2.23	2.22	2.22	2.23	2.22	2.21	2.22	2.2	2.2	2.22	2.23	2.19	2.2	2.18	2.19	2.2
903	2.25	2.24	2.24	2.24	2.24	2.25	2.22	2.25	2.24	2.22	2.22	2.22	2.18	2.17	2.17	2.14	2.15	2.16	2.25	2.22	2.23	2.22	2.22	2.23	2.22	2.21	2.22	2.2	2.2	2.22	2.23	2.19	2.2	2.18	2.18	2.2
913	2.25	2.24	2.24	2.24	2.24	2.25	2.22	2.24	2.24	2.22	2.22	2.22	2.18	2.17	2.17	2.14	2.15	2.15	2.25	2.22	2.23	2.22	2.22	2.23	2.22	2.21	2.22	2.2	2.2	2.22	2.23	2.19	2.2	2.18	2.18	2.19
923	2.25	2.24	2.24	2.24	2.23	2.25	2.22	2.24	2.24	2.22	2.22	2.22	2.18	2.16	2.17	2.14	2.15	2.15	2.25	2.22	2.23	2.22	2.22	2.23	2.22	2.21	2.22	2.2	2.2	2.22	2.23	2.19	2.2	2.17	2.18	2.19
933	2.25	2.24	2.24	2.24	2.23	2.25	2.22	2.24	2.24	2.22	2.22	2.22	2.17	2.16	2.17	2.14	2.15	2.15	2.25	2.22	2.23	2.22	2.22	2.23	2.22	2.21	2.22	2.2	2.2	2.22	2.23	2.19	2.2	2.17	2.18	2.19
943	2.25	2.24	2.24	2.24	2.23	2.25	2.22	2.24	2.23	2.22	2.22	2.22	2.17	2.16	2.17	2.13	2.15	2.15	2.25	2.22	2.23	2.22	2.22	2.23	2.22	2.21	2.22	2.2	2.2	2.22	2.23	2.19	2.2	2.17	2.18	2.19
953	2.25	2.24	2.24	2.24	2.23	2.25	2.22	2.24	2.23	2.22	2.22	2.22	2.17	2.16	2.17	2.13	2.14	2.15	2.25	2.22	2.23	2.22	2.22	2.23	2.22	2.21	2.22	2.2	2.2	2.22	2.23	2.19	2.2	2.17	2.18	2.19
963	2.25	2.24	2.24	2.24	2.23	2.25	2.22	2.24	2.23	2.22	2.22	2.22	2.17	2.16	2.17	2.13	2.14	2.15	2.25	2.22	2.23	2.22	2.22	2.23	2.22	2.21	2.22	2.2	2.2	2.22	2.23	2.19	2.2	2.17	2.18	2.19
973	2.25	2.24	2.24	2.24	2.23	2.25	2.22	2.24	2.23	2.22	2.22	2.22	2.17	2.16	2.16	2.13	2.14	2.14	2.25	2.22	2.23	2.22	2.22	2.23	2.22	2.21	2.22	2.2	2.2	2.22	2.23	2.19	2.2	2.17	2.18	2.18
984	2.25	2.24	2.24	2.24	2.23	2.25	2.22	2.24	2.23	2.22	2.22	2.22	2.17	2.16	2.16	2.13	2.14	2.14	2.25	2.22	2.22	2.22	2.22	2.23	2.22	2.21	2.22	2.2	2.2	2.22	2.23	2.19	2.2	2.17	2.17	2.18
994	2.25	2.24	2.24	2.24	2.23	2.25	2.22	2.24	2.23	2.22	2.22	2.21	2.17	2.16	2.16	2.13	2.14	2.14	2.25	2.22	2.22	2.22	2.22	2.23	2.22	2.21	2.21	2.2	2.2	2.22	2.23	2.19	2.2	2.17	2.17	2.18
1004	2.25	2.24	2.24	2.24	2.23	2.25	2.22	2.24	2.23	2.21	2.21	2.21	2.17	2.15	2.16	2.12	2.14	2.14	2.25	2.22	2.22	2.22	2.22	2.23	2.22	2.21	2.21	2.2	2.2	2.22	2.23	2.19	2.2	2.16	2.17	2.18
1014	2.25	2.24	2.24	2.24	2.23	2.25	2.22	2.24	2.23	2.21	2.21	2.21	2.17	2.15	2.16	2.12	2.14	2.14	2.25	2.22	2.22	2.22	2.22	2.23	2.22	2.21	2.21	2.2	2.2	2.22	2.23	2.19	2.2	2.16	2.17	2.18
1024	2.25	2.24	2.24	2.24	2.23	2.25	2.21	2.24	2.23	2.21	2.21	2.21	2.16	2.15	2.16	2.12	2.13	2.14	2.25	2.22	2.22	2.22	2.22	2.23	2.22	2.21	2.21	2.2	2.2	2.22	2.23	2.19	2.2	2.16	2.17	2.18
1034	2.25	2.24	2.24	2.24	2.23	2.25	2.21	2.24	2.23	2.21	2.21	2.21	2.16	2.15	2.16	2.12	2.13	2.14	2.25	2.22	2.22	2.22	2.22	2.23	2.22	2.21	2.21	2.2	2.2	2.22	2.23	2.18	2.2	2.16	2.17	2.18
1044	2.25	2.24	2.24	2.24	2.23	2.25	2.21	2.24	2.23	2.21	2.21	2.21	2.16	2.15	2.16	2.12	2.13	2.13	2.25	2.22	2.22	2.22	2.22	2.23	2.22	2.21	2.21	2.2	2.2	2.22	2.23	2.18	2.2	2.16	2.17	2.17
1055	2.25	2.24	2.24	2.24	2.23	2.25	2.21	2.24	2.23	2.21	2.21	2.21	2.16	2.15	2.16	2.12	2.13	2.13	2.25	2.22	2.22	2.22	2.22	2.23	2.22	2.21	2.21	2.2	2.2	2.22	2.23	2.18	2.2	2.16	2.17	2.17
1065	2.25	2.24	2.24	2.24	2.23	2.25	2.21	2.24	2.23	2.21	2.21	2.21	2.16	2.15	2.15	2.12	2.13	2.13	2.25	2.22	2.22	2.22	2.22	2.22	2.22	2.21	2.21	2.2	2.2	2.22	2.23	2.18	2.19	2.16	2.17	2.17
1075	2.25	2.24	2.24	2.24	2.23	2.25	2.21	2.23	2.23	2.21	2.21	2.21	2.16	2.15	2.15	2.11	2.13	2.13	2.25	2.22	2.22	2.22	2.22	2.22	2.22	2.21	2.21	2.2	2.2	2.22	2.23	2.18	2.19	2.15	2.16	2.17
1085	2.25	2.24	2.24	2.24	2.23	2.25	2.21	2.23	2.23	2.21	2.21	2.21	2.16	2.15	2.15	2.11	2.13	2.13	2.25	2.22	2.22	2.22	2.22	2.22	2.22	2.21	2.21	2.2	2.2	2.22	2.23	2.18	2.19	2.15	2.16	2.17
1095	2.25	2.24	2.24	2.24	2.23	2.25	2.21	2.23	2.23	2.21	2.21	2.21	2.16	2.14	2.15	2.11	2.12	2.13	2.25	2.22	2.22	2.22	2.22	2.22	2.22	2.21	2.21	2.2	2.2	2.22	2.23	2.18	2.19	2.15	2.16	2.17
1105	2.25	2.24	2.24	2.24	2.23	2.25	2.21	2.23	2.23	2.21	2.21	2.21	2.16	2.14	2.15	2.11	2.12	2.13	2.25	2.22	2.22	2.22	2.22	2.22	2.22	2.21	2.21	2.19	2.2	2.22	2.23	2.18	2.19	2.15	2.16	2.17
1115	2.25	2.24	2.24	2.24	2.23	2.25	2.21	2.23	2.23	2.21	2.21	2.2	2.15	2.14	2.15	2.11	2.12	2.13	2.25	2.22	2.22	2.22	2.22	2.22	2.22	2.21	2.21	2.19	2.2	2.22	2.23	2.18	2.19	2.15	2.16	2.16
1126	2.25	2.24	2.24	2.24	2.23	2.25	2.21	2.23	2.23	2.2	2.21	2.2	2.15	2.14	2.15	2.11	2.12	2.12	2.25	2.22	2.22	2.22	2.22	2.22	2.22	2.21	2.21	2.19	2.2	2.22	2.23	2.18	2.19	2.15	2.16	2.16
1136	2.25	2.24	2.24	2.24	2.23	2.25	2.21	2.23	2.23	2.2	2.2	2.2	2.15	2.14	2.15	2.11	2.12	2.12	2.25	2.22	2.22	2.22	2.22	2.22	2.22	2.21	2.21	2.19	2.2	2.22	2.23	2.18	2.19	2.15	2.16	2.16
1146	2.25	2.24	2.24	2.24	2.23	2.25	2.21	2.23	2.23	2.2	2.2	2.2	2.15	2.14	2.15	2.1	2.12	2.12	2.25	2.22	2.22	2.22	2.22	2.22	2.22	2.21	2.21	2.19	2.2	2.22	2.23	2.18	2.19	2.15	2.16	2.16
1156	2.25	2.24	2.24	2.24	2.23	2.25	2.21	2.23	2.23	2.2	2.2	2.2	2.15	2.14	2.14	2.1	2.12	2.12	2.25	2.22	2.22	2.22	2.22	2.22	2.22	2.21	2.21	2.19	2.2	2.22	2.23	2.18	2.19	2.14	2.15	2.16
1166	2.25	2.24	2.24	2.24	2.23	2.25	2.21	2.23	2.23	2.2	2.2	2.2	2.15	2.14	2.14	2.1	2.11	2.12	2.25	2.22	2.22	2.22	2.22	2.22	2.22	2.21	2.21	2.19	2.2	2.22	2.23	2.18	2.19	2.14	2.15	2.16
1176	2.25	2.24	2.24	2.24	2.23	2.25	2.21	2.23	2.23	2.2	2.2	2.2	2.15	2.14	2.14	2.1	2.11	2.12	2.25	2.22	2.22	2.22	2.22	2.22	2.22	2.21	2.21	2.19	2.2	2.22	2.23	2.17	2.19	2.14	2.15	2.16
1186	2.25	2.24	2.24	2.23	2.23	2.25	2.21	2.23	2.23	2.2	2.2	2.2	2.15	2.14	2.14	2.1	2.11	2.12	2.25	2.22	2.22	2.22	2.22	2.22	2.22	2.21	2.21	2.19	2.19	2.22	2.22	2.17	2.19	2.14	2.15	2.15
1197	2.25	2.24	2.24	2.23	2.23	2.25	2.21	2.23	2.22	2.2	2.2	2.2	2.15	2.13	2.14	2.1	2.11	2.12	2.25	2.22	2.22	2.22	2.22	2.22	2.22	2.21	2.21	2.19	2.19	2.21	2.22	2.17	2.19	2.14	2.15	2.15
1207	2.25	2.24	2.24	2.23	2.23	2.25	2.21	2.23	2.22	2.2	2.2	2.2	2.15	2.13	2.14	2.1	2.11	2.11	2.25	2.22	2.22	2.22	2.22	2.22	2.22	2.21	2.21	2.19	2.19	2.21	2.22	2.17	2.19	2.14	2.15	2.15
1217	2.25	2.24	2.24	2.23	2.23	2.25	2.21	2.22	2.22	2.2	2.2	2.2	2.14	2.13	2.14	2.1	2.11	2.11	2.25	2.22	2.22	2.22	2.22	2.22	2.22	2.2	2.21	2.19	2.19	2.21	2.22	2.17	2.18	2.14	2.15	2.15
1227	2.25	2.24	2.24	2.23	2.23	2.25	2.2	2.22	2.22	2.2	2.2	2.2	2.14	2.13	2.14	2.1	2.11	2.11	2.25	2.22	2.22	2.22	2.22	2.22	2.22	2.2	2.21	2.19	2.19	2.21	2.22	2.17	2.18	2.14	2.15	2.15
1237	2.25	2.24	2.24	2.23	2.23	2.25	2.2	2.22	2.22	2.2	2.2	2.2	2.14	2.13	2.14	2.09	2.11	2.11	2.25	2.22	2.22	2.22	2.22	2.22	2.22	2.2	2.21	2.19	2.19	2.21	2.22	2.17	2.18	2.13	2.15	2.15
1247	2.25	2.23	2.24	2.23	2.23	2.25	2.2	2.22	2.22	2.2	2.2	2.2	2.14	2.13	2.14	2.09	2.1	2.11	2.25	2.22	2.22	2.22	2.22	2.22	2.22	2.2	2.21	2.19	2.19	2.21	2.22	2.17	2.18	2.13	2.14	2.14
1257	2.25	2.23	2.24	2.23	2.23	2.25	2.2	2.22	2.22	2.2	2.2	2.2	2.14	2.13	2.14	2.09	2.1	2.11	2.25	2.22	2.22	2.22	2.22	2.22	2.22	2.2	2.21	2.19	2.19	2.21	2.22	2.17	2.18	2.13	2.14	2.14
1268	2.25	2.23	2.24	2.23	2.23	2.25	2.2	2.22	2.22	2.19	2.2	2.19	2.14	2.13	2.13	2.09	2.1	2.11	2.25	2.22	2.22	2.22	2.22	2.22	2.22	2.2	2.21	2.19	2.19	2.21	2.22	2.17	2.18	2.13	2.14	2.14
1278	2.25	2.23	2.24	2.23	2.23	2.24	2.2	2.22	2.22	2.19	2.19	2.19	2.14	2.13	2.13	2.09	2.1	2.11	2.25	2.22	2.22	2.22	2.22	2.22	2.22	2.2	2.21	2.19	2.19	2.21	2.22	2.17	2.18	2.13	2.14	2.14
1288	2.25	2.23	2.24	2.23	2.23	2.24	2.2	2.22	2.22	2.19	2.19	2.19	2.14	2.13	2.13	2.09	2.1	2.11	2.25	2.22	2.22	2.22	2.22	2.22	2.22	2.2	2.21	2.19	2.19	2.21	2.22	2.17	2.18	2.13	2.14	2.14
1298	2.25	2.23	2.24	2.23	2.23	2.24	2.2	2.22	2.22	2.19	2.19	2.19	2.14	2.13	2.13	2.09	2.1	2.11	2.25	2.22	2.22	2.22	2.22	2.22	2.22	2.2	2.21	2.19	2.19	2.21	2.22	2.17	2.18	2.13	2.14	2.14
1308	2.25	2.23	2.24	2.23	2.23	2.24	2.2	2.22	2.22	2.19	2.19	2.19	2.14	2.12	2.13	2.09	2.1	2.1	2.25	2.22	2.22	2.22	2.22	2.22	2.22	2.2	2.21	2.19	2.19	2.21	2.22	2.17	2.18	2.13	2.14	2.14
1318	2.25	2.23	2.24	2.23	2.23	2.24	2.2	2.22	2.22	2.19	2.19	2.19	2.14	2.12	2.13	2.09	2.1	2.1	2.25	2.22	2.22	2.22	2.22	2.22	2.22	2.2	2.21	2.19	2.19	2.21	2.22	2.17	2.18	2.12	2.14	2.13
1329	2.25	2.23	2.24	2.23	2.23	2.24	2.2	2.22	2.22	2.19	2.19	2.19	2.13	2.12	2.13	2.09	2.1	2.1	2.25	2.22	2.22	2.22	2.22	2.22	2.22	2.2	2.21	2.19	2.19	2.21	2.22	2.16	2.18	2.12	2.13	2.13
1339	2.25	2.23	2.24	2.23	2.23	2.24	2.2	2.22	2.22	2.19	2.19	2.19	2.13	2.12	2.13	2.08	2.09	2.1	2.25	2.22	2.22	2.22	2.22	2.22	2.22	2.2	2.21	2.19	2.19	2.21	2.22	2.16	2.18	2.12	2.13	2.13
1349	2.25	2.23	2.24	2.23	2.23	2.24	2.2	2.22	2.22	2.19	2.19	2.19	2.13	2.12	2.13	2.08	2.09	2.1	2.25	2.22	2.22	2.22	2.22	2.22	2.22	2.2	2.21	2.19	2.19	2.21	2.22	2.16	2.18	2.12	2.13	2.13
1359	2.25	2.23	2.24	2.23	2.23	2.24	2.2	2.21	2.22	2.19	2.19	2.19	2.13	2.12	2.13	2.08	2.09	2.1	2.25	2.22	2.22	2.22	2.22	2.22	2.22	2.2	2.21	2.19	2.19	2.21	2.22	2.16	2.18	2.12	2.13	2.13
1369	2.25	2.23	2.24	2.23	2.23	2.24	2.2	2.21	2.22	2.19	2.19	2.19	2.13	2.12	2.13	2.08	2.09	2.1	2.25	2.22	2.22	2.22	2.22	2.22	2.22	2.2	2.21	2.19	2.19	2.21	2.22	2.16	2.17	2.12	2.13	2.13
1379	2.25	2.23	2.24	2.23	2.23	2.24	2.2	2.21	2.22	2.19	2.19	2.19	2.13	2.12	2.12	2.08	2.09	2.1	2.25	2.22	2.22	2.22	2.22	2.22	2.22	2.2	2.21	2.18	2.19	2.21	2.22	2.16	2.17	2.12	2.13	2.13
1390	2.25	2.23	2.24	2.23	2.23	2.24	2.2	2.21	2.22	2.19	2.19	2.19	2.13	2.12	2.12	2.08	2.09	2.1	2.25	2.22	2.22	2.22	2.22	2.22	2.22	2.2	2.21	2.18	2.19	2.21	2.22	2.16	2.17	2.11	2.13	2.12
1400	2.25	2.23	2.24	2.23	2.23	2.24	2.2	2.21	2.22	2.19	2.19	2.19	2.13	2.12	2.12	2.08	2.09	2.1	2.25	2.22	2.22	2.22	2.22	2.22	2.21	2.2	2.21	2.18	2.19	2.21	2.22	2.16	2.17	2.11	2.13	2.12
1410	2.25	2.23	2.24	2.23	2.23	2.24	2.2	2.21	2.22	2.19	2.19	2.19	2.13	2.12	2.12	2.08	2.09	2.09	2.25	2.22	2.22	2.22	2.22	2.22	2.21	2.2	2.21	2.18	2.19	2.21	2.21	2.16	2.17	2.11	2.13	2.12
1420	2.25	2.23	2.24	2.23	2.23	2.24	2.2	2.21	2.22	2.18	2.19	2.18	2.13	2.11	2.12	2.08	2.09	2.09	2.25	2.22	2.22	2.22	2.22	2.22	2.21	2.2	2.21	2.18	2.19	2.21	2.21	2.16	2.17	2.11	2.12	2.12
1430	2.25	2.23	2.24	2.23	2.22	2.24	2.19	2.21	2.22	2.18	2.19	2.18	2.13	2.11	2.12	2.07	2.09	2.09	2.25	2.22	2.22	2.22	2.22	2.22	2.21	2.2	2.21	2.18	2.19	2.21	2.21	2.16	2.17	2.11	2.12	2.12
1440	2.25	2.23	2.24	2.23	2.22	2.24	2.19	2.21	2.22	2.18	2.18	2.18	2.13	2.11	2.12	2.07	2.08	2.09	2.25	2.22	2.22	2.22	2.22	2.22	2.21	2.2	2.21	2.18	2.19	2.21	2.21	2.16	2.17	2.11	2.12	2.12
1450	2.25	2.23	2.24	2.23	2.22	2.24	2.19	2.21	2.21	2.18	2.18	2.18	2.12	2.11	2.12	2.07	2.08	2.09	2.25	2.22	2.22	2.22	2.22	2.22	2.21	2.2	2.21	2.18	2.19	2.21	2.21	2.16	2.17	2.11	2.12	2.12
1461	2.25	2.23	2.24	2.23	2.22	2.24	2.19	2.21	2.21	2.18	2.18	2.18	2.12	2.11	2.12	2.07	2.08	2.09	2.25	2.22	2.22	2.22	2.22	2.22	2.21	2.2	2.21	2.18	2.19	2.21	2.21	2.16	2.17	2.11	2.12	2.11
1471	2.25	2.23	2.24	2.23	2.22	2.24	2.19	2.21	2.21	2.18	2.18	2.18	2.12	2.11	2.12	2.07	2.08	2.09	2.25	2.22	2.22	2.22	2.22	2.22	2.21	2.2	2.21	2.18	2.19	2.21	2.21	2.16	2.17	2.11	2.12	2.11
1481	2.25	2.23	2.24	2.23	2.22	2.24	2.19	2.21	2.21	2.18	2.18	2.18	2.12	2.11	2.12	2.07	2.08	2.09	2.25	2.22	2.22	2.22	2.22	2.22	2.21	2.2	2.21	2.18	2.19	2.21	2.21	2.15	2.17	2.1	2.12	2.11
1491	2.25	2.23	2.24	2.23	2.22	2.24	2.19	2.21	2.21	2.18	2.18	2.18	2.12	2.11	2.12	2.07	2.08	2.09	2.25	2.22	2.22	2.22	2.22	2.22	2.21	2.2	2.21	2.18	2.19	2.21	2.21	2.15	2.17	2.1	2.12	2.11
1501	2.25	2.23	2.24	2.23	2.22	2.24	2.19	2.2	2.21	2.18	2.18	2.18	2.12	2.11	2.12	2.07	2.08	2.09	2.25	2.22	2.22	2.22	2.22	2.22	2.21	2.2	2.21	2.18	2.18	2.21	2.21	2.15	2.17	2.1	2.12	2.11
1511	2.25	2.23	2.24	2.23	2.22	2.24	2.19	2.2	2.21	2.18	2.18	2.18	2.12	2.11	2.11	2.07	2.08	2.09	2.25	2.22	2.22	2.22	2.22	2.22	2.21	2.2	2.21	2.18	2.18	2.21	2.21	2.15	2.17	2.1	2.11	2.11
1521	2.25	2.23	2.24	2.23	2.22	2.24	2.19	2.2	2.21	2.18	2.18	2.18	2.12	2.11	2.11	2.07	2.08	2.08	2.25	2.22	2.22	2.22	2.22	2.22	2.21	2.2	2.21	2.18	2.18	2.21	2.21	2.15	2.16	2.1	2.11	2.11
1532	2.25	2.23	2.24	2.23	2.22	2.24	2.19	2.2	2.21	2.18	2.18	2.18	2.12	2.11	2.11	2.07	2.08	2.08	2.25	2.22	2.22	2.22	2.22	2.22	2.21	2.2	2.21	2.18	2.18	2.21	2.21	2.15	2.16	2.1	2.11	2.11
1542	2.25	2.23	2.24	2.23	2.22	2.24	2.19	2.2	2.21	2.18	2.18	2.18	2.12	2.11	2.11	2.07	2.07	2.08	2.25	2.22	2.22	2.22	2.22	2.22	2.21	2.2	2.2	2.18	2.18	2.21	2.21	2.15	2.16	2.1	2.11	2.1
1552	2.25	2.23	2.24	2.23	2.22	2.24	2.19	2.2	2.21	2.18	2.18	2.18	2.12	2.11	2.11	2.06	2.07	2.08	2.25	2.22	2.22	2.22	2.22	2.22	2.21	2.2	2.2	2.18	2.18	2.21	2.21	2.15	2.16	2.1	2.11	2.1
1562	2.25	2.23	2.24	2.23	2.22	2.24	2.19	2.2	2.21	2.18	2.18	2.18	2.12	2.1	2.11	2.06	2.07	2.08	2.25	2.22	2.22	2.22	2.22	2.22	2.21	2.2	2.2	2.18	2.18	2.21	2.21	2.15	2.16	2.1	2.11	2.1
1572	2.25	2.23	2.24	2.23	2.22	2.24	2.19	2.2	2.21	2.18	2.18	2.18	2.11	2.1	2.11	2.06	2.07	2.08	2.25	2.22	2.22	2.22	2.22	2.22	2.21	2.2	2.2	2.18	2.18	2.21	2.21	2.15	2.16	2.09	2.11	2.1
1582	2.25	2.23	2.24	2.23	2.22	2.24	2.19	2.2	2.21	2.18	2.18	2.18	2.11	2.1	2.11	2.06	2.07	2.08	2.25	2.21	2.22	2.22	2.22	2.22	2.21	2.2	2.2	2.18	2.18	2.21	2.2	2.15	2.16	2.09	2.11	2.1
1593	2.25	2.23	2.24	2.23	2.22	2.24	2.19	2.2	2.21	2.17	2.18	2.17	2.11	2.1	2.11	2.06	2.07	2.08	2.25	2.21	2.22	2.22	2.22	2.22	2.21	2.2	2.2	2.18	2.18	2.21	2.2	2.15	2.16	2.09	2.11	2.1
1603	2.25	2.23	2.24	2.23	2.22	2.24	2.19	2.2	2.21	2.17	2.18	2.17	2.11	2.1	2.11	2.06	2.07	2.08	2.25	2.21	2.22	2.22	2.22	2.22	2.21	2.2	2.2	2.18	2.18	2.21	2.2	2.15	2.16	2.09	2.1	2.1
1613	2.25	2.23	2.24	2.23	2.22	2.24	2.19	2.2	2.21	2.17	2.18	2.17	2.11	2.1	2.11	2.06	2.07	2.08	2.25	2.21	2.22	2.22	2.22	2.22	2.21	2.2	2.2	2.18	2.18	2.21	2.2	2.15	2.16	2.09	2.1	2.09
1623	2.25	2.23	2.24	2.23	2.22	2.24	2.19	2.2	2.21	2.17	2.18	2.17	2.11	2.1	2.11	2.06	2.07	2.08	2.25	2.21	2.22	2.22	2.22	2.22	2.21	2.2	2.2	2.18	2.18	2.21	2.2	2.15	2.16	2.09	2.1	2.09
1633	2.25	2.23	2.24	2.23	2.22	2.24	2.19	2.2	2.21	2.17	2.18	2.17	2.11	2.1	2.11	2.06	2.07	2.08	2.25	2.21	2.22	2.22	2.22	2.22	2.21	2.2	2.2	2.18	2.18	2.21	2.2	2.15	2.16	2.09	2.1	2.09
1643	2.25	2.23	2.24	2.23	2.22	2.24	2.18	2.2	2.21	2.17	2.17	2.17	2.11	2.1	2.11	2.06	2.07	2.07	2.25	2.21	2.22	2.22	2.22	2.22	2.21	2.2	2.2	2.17	2.18	2.21	2.2	2.14	2.16	2.09	2.1	2.09
1653	2.25	2.23	2.24	2.22	2.22	2.24	2.18	2.19	2.21	2.17	2.17	2.17	2.11	2.1	2.11	2.06	2.07	2.07	2.25	2.21	2.22	2.22	2.22	2.22	2.21	2.2	2.2	2.17	2.18	2.21	2.2	2.14	2.16	2.08	2.1	2.09
1664	2.25	2.23	2.24	2.22	2.22	2.24	2.18	2.19	2.21	2.17	2.17	2.17	2.11	2.1	2.1	2.06	2.06	2.07	2.25	2.21	2.22	2.22	2.22	2.22	2.21	2.2	2.2	2.17	2.18	2.21	2.2	2.14	2.16	2.08	2.1	2.09
1674	2.25	2.23	2.24	2.22	2.22	2.23	2.18	2.19	2.21	2.17	2.17	2.17	2.11	2.1	2.1	2.06	2.06	2.07	2.25	2.21	2.22	2.22	2.22	2.22	2.21	2.2	2.2	2.17	2.18	2.21	2.2	2.14	2.16	2.08	2.1	2.09
1684	2.25	2.23	2.24	2.22	2.22	2.23	2.18	2.19	2.21	2.17	2.17	2.17	2.11	2.1	2.1	2.05	2.06	2.07	2.25	2.21	2.22	2.22	2.22	2.22	2.21	2.2	2.2	2.17	2.18	2.21	2.2	2.14	2.16	2.08	2.1	2.09
1694	2.25	2.23	2.24	2.22	2.22	2.23	2.18	2.19	2.21	2.17	2.17	2.17	2.11	2.1	2.1	2.05	2.06	2.07	2.25	2.21	2.22	2.22	2.22	2.22	2.21	2.2	2.2	2.17	2.18	2.21	2.2	2.14	2.16	2.08	2.1	2.09
1704	2.25	2.23	2.24	2.22	2.22	2.23	2.18	2.19	2.21	2.17	2.17	2.17	2.11	2.1	2.1	2.05	2.06	2.07	2.25	2.21	2.22	2.22	2.22	2.22	2.21	2.2	2.2	2.17	2.18	2.21	2.2	2.14	2.16	2.08	2.1	2.08
1714	2.25	2.23	2.24	2.22	2.22	2.23	2.18	2.19	2.21	2.17	2.17	2.17	2.1	2.1	2.1	2.05	2.06	2.07	2.25	2.21	2.22	2.22	2.22	2.22	2.21	2.2	2.2	2.17	2.18	2.21	2.2	2.14	2.15	2.08	2.1	2.08
1724	2.25	2.23	2.24	2.22	2.22	2.23	2.18	2.19	2.2	2.17	2.17	2.17	2.1	2.1	2.1	2.05	2.06	2.07	2.25	2.21	2.22	2.22	2.22	2.22	2.21	2.2	2.2	2.17	2.18	2.21	2.2	2.14	2.15	2.08	2.1	2.08
1735	2.25	2.23	2.24	2.22	2.22	2.23	2.18	2.19	2.2	2.17	2.17	2.17	2.1	2.09	2.1	2.05	2.06	2.07	2.25	2.21	2.22	2.22	2.22	2.22	2.21	2.2	2.2	2.17	2.18	2.21	2.2	2.14	2.15	2.08	2.09	2.08
1745	2.25	2.23	2.24	2.22	2.22	2.23	2.18	2.19	2.2	2.17	2.17	2.17	2.1	2.09	2.1	2.05	2.06	2.07	2.25	2.21	2.22	2.22	2.22	2.22	2.21	2.2	2.2	2.17	2.18	2.21	2.2	2.14	2.15	2.08	2.09	2.08
1755	2.25	2.23	2.24	2.22	2.22	2.23	2.18	2.19	2.2	2.17	2.17	2.17	2.1	2.09	2.1	2.05	2.06	2.07	2.25	2.21	2.22	2.22	2.22	2.22	2.21	2.2	2.2	2.17	2.18	2.21	2.2	2.14	2.15	2.07	2.09	2.08
1765	2.25	2.23	2.24	2.22	2.22	2.23	2.18	2.19	2.2	2.17	2.17	2.17	2.1	2.09	2.1	2.05	2.06	2.07	2.25	2.21	2.22	2.22	2.22	2.22	2.21	2.2	2.2	2.17	2.18	2.21	2.2	2.14	2.15	2.07	2.09	2.08
1775	2.25	2.23	2.24	2.22	2.22	2.23	2.18	2.19	2.2	2.17	2.17	2.17	2.1	2.09	2.1	2.05	2.06	2.07	2.25	2.21	2.22	2.22	2.21	2.22	2.21	2.2	2.2	2.17	2.18	2.21	2.19	2.14	2.15	2.07	2.09	2.08
1785	2.25	2.23	2.24	2.22	2.22	2.23	2.18	2.19	2.2	2.16	2.17	2.17	2.1	2.09	2.1	2.05	2.06	2.06	2.25	2.21	2.22	2.22	2.21	2.22	2.21	2.2	2.2	2.17	2.18	2.21	2.19	2.14	2.15	2.07	2.09	2.07
1795	2.25	2.23	2.23	2.22	2.22	2.23	2.18	2.19	2.2	2.16	2.17	2.17	2.1	2.09	2.1	2.05	2.05	2.06	2.25	2.21	2.22	2.22	2.21	2.22	2.21	2.2	2.2	2.17	2.18	2.21	2.19	2.14	2.15	2.07	2.08	2.07
1806	2.25	2.23	2.23	2.22	2.22	2.23	2.18	2.19	2.2	2.16	2.17	2.17	2.1	2.09	2.1	2.05	2.05	2.06	2.25	2.21	2.22	2.22	2.21	2.22	2.21	2.2	2.2	2.17	2.18	2.21	2.19	2.13	2.15	2.07	2.08	2.07
1816	2.25	2.23	2.23	2.22	2.22	2.23	2.18	2.19	2.2	2.16	2.17	2.17	2.1	2.09	2.1	2.05	2.05	2.06	2.25	2.21	2.22	2.22	2.21	2.22	2.21	2.2	2.2	2.17	2.18	2.21	2.19	2.13	2.15	2.07	2.08	2.07
1826	2.25	2.23	2.23	2.22	2.22	2.23	2.18	2.19	2.2	2.16	2.17	2.16	2.1	2.09	2.1	2.05	2.05	2.06	2.25	2.21	2.22	2.22	2.21	2.22	2.21	2.2	2.2	2.17	2.18	2.21	2.19	2.13	2.15	2.07	2.08	2.07
1836	2.25	2.23	2.23	2.22	2.22	2.23	2.18	2.19	2.2	2.16	2.17	2.16	2.1	2.09	2.1	2.04	2.05	2.06	2.25	2.21	2.22	2.22	2.21	2.22	2.21	2.2	2.2	2.17	2.18	2.21	2.19	2.13	2.15	2.07	2.08	2.07
1846	2.25	2.23	2.23	2.22	2.22	2.23	2.18	2.18	2.2	2.16	2.17	2.16	2.1	2.09	2.1	2.04	2.05	2.06	2.25	2.21	2.22	2.22	2.21	2.22	2.21	2.2	2.2	2.17	2.18	2.21	2.19	2.13	2.15	2.06	2.08	2.07
1856	2.25	2.23	2.23	2.22	2.22	2.23	2.18	2.18	2.2	2.16	2.17	2.16	2.1	2.09	2.09	2.04	2.05	2.06	2.25	2.21	2.22	2.22	2.21	2.22	2.21	2.2	2.2	2.17	2.18	2.21	2.19	2.13	2.15	2.06	2.08	2.07
1866	2.25	2.23	2.23	2.22	2.22	2.23	2.18	2.18	2.2	2.16	2.17	2.16	2.1	2.09	2.09	2.04	2.05	2.06	2.25	2.21	2.22	2.22	2.21	2.22	2.21	2.19	2.2	2.17	2.18	2.21	2.19	2.13	2.15	2.06	2.08	2.07
1877	2.25	2.23	2.23	2.22	2.22	2.23	2.18	2.18	2.2	2.16	2.17	2.16	2.09	2.09	2.09	2.04	2.05	2.06	2.25	2.21	2.22	2.22	2.21	2.22	2.21	2.19	2.2	2.17	2.18	2.21	2.19	2.13	2.15	2.06	2.08	2.06
1887	2.25	2.23	2.23	2.22	2.22	2.23	2.18	2.18	2.2	2.16	2.16	2.16	2.09	2.09	2.09	2.04	2.05	2.06	2.25	2.21	2.22	2.22	2.21	2.22	2.21	2.19	2.2	2.17	2.18	2.21	2.19	2.13	2.14	2.06	2.08	2.06
1897	2.25	2.23	2.23	2.22	2.21	2.23	2.18	2.18	2.2	2.16	2.16	2.16	2.09	2.09	2.09	2.04	2.05	2.06	2.25	2.21	2.22	2.22	2.21	2.22	2.21	2.19	2.2	2.17	2.17	2.21	2.19	2.13	2.14	2.06	2.07	2.06
1907	2.24	2.23	2.23	2.22	2.21	2.23	2.18	2.18	2.2	2.16	2.16	2.16	2.09	2.09	2.09	2.04	2.05	2.06	2.25	2.21	2.22	2.22	2.21	2.22	2.21	2.19	2.2	2.17	2.17	2.21	2.19	2.13	2.14	2.06	2.07	2.06
1917	2.24	2.23	2.23	2.22	2.21	2.23	2.18	2.18	2.2	2.16	2.16	2.16	2.09	2.09	2.09	2.04	2.05	2.06	2.25	2.21	2.22	2.22	2.21	2.22	2.21	2.19	2.2	2.17	2.17	2.21	2.19	2.13	2.14	2.06	2.07	2.06
1927	2.24	2.23	2.23	2.22	2.21	2.23	2.17	2.18	2.2	2.16	2.16	2.16	2.09	2.09	2.09	2.04	2.05	2.06	2.25	2.21	2.22	2.22	2.21	2.22	2.21	2.19	2.2	2.17	2.17	2.21	2.19	2.13	2.14	2.06	2.07	2.06
1937	2.24	2.23	2.23	2.22	2.21	2.23	2.17	2.18	2.2	2.16	2.16	2.16	2.09	2.08	2.09	2.04	2.05	2.06	2.25	2.21	2.22	2.22	2.21	2.22	2.21	2.19	2.2	2.17	2.17	2.21	2.19	2.13	2.14	2.06	2.07	2.06
1948	2.24	2.23	2.23	2.22	2.21	2.23	2.17	2.18	2.2	2.16	2.16	2.16	2.09	2.08	2.09	2.04	2.04	2.05	2.25	2.21	2.22	2.22	2.21	2.22	2.21	2.19	2.2	2.17	2.17	2.21	2.18	2.13	2.14	2.06	2.07	2.06
1958	2.24	2.23	2.23	2.22	2.21	2.23	2.17	2.18	2.2	2.16	2.16	2.16	2.09	2.08	2.09	2.04	2.04	2.05	2.25	2.21	2.22	2.22	2.21	2.22	2.21	2.19	2.2	2.16	2.17	2.21	2.18	2.13	2.14	2.05	2.07	2.06
1968	2.24	2.23	2.23	2.22	2.21	2.22	2.17	2.18	2.2	2.16	2.16	2.16	2.09	2.08	2.09	2.04	2.04	2.05	2.25	2.21	2.22	2.22	2.21	2.22	2.21	2.19	2.2	2.16	2.17	2.21	2.18	2.13	2.14	2.05	2.07	2.06
1978	2.24	2.23	2.23	2.22	2.21	2.22	2.17	2.18	2.2	2.16	2.16	2.16	2.09	2.08	2.09	2.04	2.04	2.05	2.25	2.21	2.22	2.22	2.21	2.22	2.21	2.19	2.2	2.16	2.17	2.21	2.18	2.13	2.14	2.05	2.07	2.05
1988	2.24	2.23	2.23	2.22	2.21	2.22	2.17	2.18	2.2	2.16	2.16	2.16	2.09	2.08	2.09	2.04	2.04	2.05	2.25	2.21	2.22	2.22	2.21	2.22	2.21	2.19	2.2	2.16	2.17	2.21	2.18	2.12	2.14	2.05	2.07	2.05
1998	2.24	2.23	2.23	2.22	2.21	2.22	2.17	2.18	2.2	2.16	2.16	2.16	2.09	2.08	2.09	2.04	2.04	2.05	2.25	2.21	2.22	2.22	2.21	2.22	2.21	2.19	2.2	2.16	2.17	2.21	2.18	2.12	2.14	2.05	2.06	2.05
2008	2.24	2.23	2.23	2.22	2.21	2.22	2.17	2.18	2.2	2.16	2.16	2.16	2.09	2.08	2.09	2.03	2.04	2.05	2.25	2.21	2.22	2.22	2.21	2.22	2.21	2.19	2.2	2.16	2.17	2.21	2.18	2.12	2.14	2.05	2.06	2.05
2019	2.24	2.23	2.23	2.22	2.21	2.22	2.17	2.18	2.2	2.15	2.16	2.16	2.09	2.08	2.09	2.03	2.04	2.05	2.25	2.21	2.22	2.22	2.21	2.22	2.21	2.19	2.2	2.16	2.17	2.21	2.18	2.12	2.14	2.05	2.06	2.05
2029	2.24	2.23	2.23	2.22	2.21	2.22	2.17	2.18	2.2	2.15	2.16	2.16	2.09	2.08	2.09	2.03	2.04	2.05	2.25	2.21	2.22	2.22	2.21	2.22	2.21	2.19	2.2	2.16	2.17	2.21	2.18	2.12	2.14	2.05	2.06	2.05
2039	2.24	2.23	2.23	2.22	2.21	2.22	2.17	2.18	2.2	2.15	2.16	2.16	2.09	2.08	2.09	2.03	2.04	2.05	2.25	2.21	2.22	2.22	2.21	2.22	2.21	2.19	2.2	2.16	2.17	2.21	2.18	2.12	2.14	2.05	2.06	2.05
2049	2.24	2.23	2.23	2.22	2.21	2.22	2.17	2.18	2.2	2.15	2.16	2.16	2.09	2.08	2.09	2.03	2.04	2.05	2.25	2.21	2.22	2.22	2.21	2.22	2.2	2.19	2.2	2.16	2.17	2.21	2.18	2.12	2.14	2.05	2.06	2.05
2059	2.24	2.23	2.23	2.22	2.21	2.22	2.17	2.18	2.2	2.15	2.16	2.16	2.09	2.08	2.09	2.03	2.04	2.05	2.25	2.21	2.22	2.22	2.21	2.22	2.2	2.19	2.2	2.16	2.17	2.21	2.18	2.12	2.14	2.04	2.06	2.05
2069	2.24	2.23	2.23	2.22	2.21	2.22	2.17	2.17	2.19	2.15	2.16	2.16	2.08	2.08	2.08	2.03	2.04	2.05	2.25	2.21	2.22	2.22	2.21	2.22	2.2	2.19	2.2	2.16	2.17	2.2	2.18	2.12	2.14	2.04	2.06	2.04
2080	2.24	2.23	2.23	2.22	2.21	2.22	2.17	2.17	2.19	2.15	2.16	2.16	2.08	2.08	2.08	2.03	2.04	2.05	2.25	2.21	2.22	2.22	2.21	2.22	2.2	2.19	2.2	2.16	2.17	2.2	2.18	2.12	2.13	2.04	2.06	2.04
2090	2.24	2.22	2.23	2.22	2.21	2.22	2.17	2.17	2.19	2.15	2.16	2.15	2.08	2.08	2.08	2.03	2.04	2.05	2.25	2.21	2.22	2.22	2.21	2.22	2.2	2.19	2.2	2.16	2.17	2.2	2.18	2.12	2.13	2.04	2.06	2.04
2100	2.24	2.22	2.23	2.22	2.21	2.22	2.17	2.17	2.19	2.15	2.16	2.15	2.08	2.08	2.08	2.03	2.04	2.05	2.25	2.21	2.22	2.22	2.21	2.22	2.2	2.19	2.2	2.16	2.17	2.2	2.18	2.12	2.13	2.04	2.06	2.04
2110	2.24	2.22	2.23	2.22	2.21	2.22	2.17	2.17	2.19	2.15	2.16	2.15	2.08	2.08	2.08	2.03	2.04	2.05	2.25	2.21	2.22	2.22	2.21	2.22	2.2	2.19	2.2	2.16	2.17	2.2	2.18	2.12	2.13	2.04	2.05	2.04
2120	2.24	2.22	2.23	2.21	2.21	2.22	2.17	2.17	2.19	2.15	2.16	2.15	2.08	2.08	2.08	2.03	2.04	2.05	2.25	2.21	2.21	2.22	2.21	2.22	2.2	2.19	2.2	2.16	2.17	2.2	2.18	2.12	2.13	2.04	2.05	2.04
2130	2.24	2.22	2.23	2.21	2.21	2.22	2.17	2.17	2.19	2.15	2.16	2.15	2.08	2.08	2.08	2.03	2.04	2.04	2.25	2.21	2.21	2.22	2.21	2.22	2.2	2.19	2.2	2.16	2.17	2.2	2.17	2.12	2.13	2.04	2.05	2.04
2140	2.24	2.22	2.23	2.21	2.21	2.22	2.17	2.17	2.19	2.15	2.16	2.15	2.08	2.08	2.08	2.03	2.03	2.04	2.25	2.21	2.21	2.22	2.21	2.22	2.2	2.19	2.2	2.16	2.17	2.2	2.17	2.12	2.13	2.04	2.05	2.04
2151	2.24	2.22	2.23	2.21	2.21	2.22	2.17	2.17	2.19	2.15	2.16	2.15	2.08	2.08	2.08	2.03	2.03	2.04	2.25	2.21	2.21	2.22	2.21	2.22	2.2	2.19	2.2	2.16	2.17	2.2	2.17	2.12	2.13	2.04	2.05	2.04
2161	2.24	2.22	2.23	2.21	2.21	2.22	2.17	2.17	2.19	2.15	2.15	2.15	2.08	2.08	2.08	2.03	2.03	2.04	2.25	2.21	2.21	2.22	2.21	2.22	2.2	2.19	2.2	2.16	2.17	2.2	2.17	2.12	2.13	2.04	2.05	2.04
2171	2.24	2.22	2.23	2.21	2.21	2.22	2.17	2.17	2.19	2.15	2.15	2.15	2.08	2.07	2.08	2.03	2.03	2.04	2.25	2.21	2.21	2.22	2.21	2.22	2.2	2.19	2.2	2.16	2.17	2.2	2.17	2.12	2.13	2.03	2.05	2.04
2181	2.24	2.22	2.23	2.21	2.21	2.22	2.17	2.17	2.19	2.15	2.15	2.15	2.08	2.07	2.08	2.03	2.03	2.04	2.25	2.21	2.21	2.22	2.21	2.22	2.2	2.19	2.2	2.16	2.17	2.2	2.17	2.12	2.13	2.03	2.05	2.03
2191	2.24	2.22	2.23	2.21	2.21	2.22	2.17	2.17	2.19	2.15	2.15	2.15	2.08	2.07	2.08	2.03	2.03	2.04	2.25	2.21	2.21	2.22	2.21	2.22	2.2	2.19	2.2	2.16	2.17	2.2	2.17	2.11	2.13	2.03	2.05	2.03
2201	2.24	2.22	2.23	2.21	2.21	2.22	2.17	2.17	2.19	2.15	2.15	2.15	2.08	2.07	2.08	2.02	2.03	2.04	2.25	2.21	2.21	2.22	2.21	2.22	2.2	2.19	2.2	2.16	2.17	2.2	2.17	2.11	2.13	2.03	2.05	2.03
2211	2.24	2.22	2.23	2.21	2.21	2.22	2.17	2.17	2.19	2.15	2.15	2.15	2.08	2.07	2.08	2.02	2.03	2.04	2.25	2.21	2.21	2.22	2.21	2.22	2.2	2.19	2.2	2.16	2.17	2.2	2.17	2.11	2.13	2.03	2.05	2.03
2222	2.24	2.22	2.23	2.21	2.21	2.22	2.16	2.17	2.19	2.15	2.15	2.15	2.08	2.07	2.08	2.02	2.03	2.04	2.25	2.21	2.21	2.22	2.21	2.22	2.2	2.19	2.2	2.16	2.17	2.2	2.17	2.11	2.13	2.03	2.04	2.03
2232	2.24	2.22	2.23	2.21	2.21	2.22	2.16	2.17	2.19	2.15	2.15	2.15	2.08	2.07	2.08	2.02	2.03	2.04	2.25	2.21	2.21	2.22	2.21	2.22	2.2	2.19	2.2	2.16	2.17	2.2	2.17	2.11	2.13	2.03	2.04	2.03
2242	2.24	2.22	2.23	2.21	2.21	2.22	2.16	2.17	2.19	2.15	2.15	2.15	2.08	2.07	2.08	2.02	2.03	2.04	2.25	2.21	2.21	2.22	2.21	2.22	2.2	2.19	2.2	2.16	2.17	2.2	2.17	2.11	2.13	2.03	2.04	2.03
2252	2.24	2.22	2.23	2.21	2.21	2.22	2.16	2.17	2.19	2.15	2.15	2.15	2.08	2.07	2.08	2.02	2.03	2.04	2.25	2.21	2.21	2.22	2.21	2.22	2.2	2.19	2.2	2.16	2.17	2.2	2.17	2.11	2.13	2.03	2.04	2.03
2262	2.24	2.22	2.23	2.21	2.21	2.22	2.16	2.17	2.19	2.15	2.15	2.15	2.08	2.07	2.08	2.02	2.03	2.04	2.24	2.21	2.21	2.22	2.21	2.22	2.2	2.19	2.2	2.16	2.17	2.2	2.17	2.11	2.13	2.03	2.04	2.03
2272	2.24	2.22	2.23	2.21	2.21	2.21	2.16	2.17	2.19	2.15	2.15	2.15	2.07	2.07	2.08	2.02	2.03	2.04	2.24	2.21	2.21	2.22	2.21	2.22	2.2	2.19	2.2	2.16	2.17	2.2	2.17	2.11	2.13	2.03	2.04	2.03
2282	2.24	2.22	2.23	2.21	2.21	2.21	2.16	2.17	2.19	2.15	2.15	2.15	2.07	2.07	2.08	2.02	2.03	2.04	2.24	2.21	2.21	2.22	2.21	2.22	2.2	2.19	2.19	2.16	2.17	2.2	2.17	2.11	2.12	2.03	2.04	2.03
2293	2.24	2.22	2.23	2.21	2.21	2.21	2.16	2.17	2.19	2.15	2.15	2.15	2.07	2.07	2.08	2.02	2.03	2.04	2.24	2.21	2.21	2.22	2.21	2.22	2.2	2.19	2.19	2.16	2.17	2.2	2.17	2.11	2.12	2.02	2.04	2.02
2303	2.24	2.22	2.23	2.21	2.21	2.21	2.16	2.17	2.19	2.14	2.15	2.15	2.07	2.07	2.08	2.02	2.03	2.04	2.24	2.21	2.21	2.22	2.21	2.22	2.2	2.19	2.19	2.16	2.17	2.2	2.16	2.11	2.12	2.02	2.04	2.02
2313	2.24	2.22	2.23	2.21	2.21	2.21	2.16	2.17	2.19	2.14	2.15	2.15	2.07	2.07	2.08	2.02	2.03	2.04	2.24	2.21	2.21	2.22	2.21	2.22	2.2	2.19	2.19	2.16	2.17	2.2	2.16	2.11	2.12	2.02	2.04	2.02
2323	2.24	2.22	2.23	2.21	2.21	2.21	2.16	2.17	2.19	2.14	2.15	2.15	2.07	2.07	2.08	2.02	2.03	2.03	2.24	2.21	2.21	2.22	2.21	2.22	2.2	2.19	2.19	2.16	2.17	2.2	2.16	2.11	2.12	2.02	2.04	2.02
2333	2.24	2.22	2.23	2.21	2.21	2.21	2.16	2.17	2.19	2.14	2.15	2.15	2.07	2.07	2.08	2.02	2.03	2.03	2.24	2.21	2.21	2.22	2.21	2.22	2.2	2.19	2.19	2.16	2.17	2.2	2.16	2.11	2.12	2.02	2.03	2.02
2343	2.24	2.22	2.23	2.21	2.21	2.21	2.16	2.16	2.19	2.14	2.15	2.15	2.07	2.07	2.07	2.02	2.03	2.03	2.24	2.21	2.21	2.22	2.21	2.22	2.2	2.19	2.19	2.16	2.17	2.2	2.16	2.11	2.12	2.02	2.03	2.02
2353	2.24	2.22	2.23	2.21	2.21	2.21	2.16	2.16	2.19	2.14	2.15	2.15	2.07	2.07	2.07	2.02	2.02	2.03	2.24	2.21	2.21	2.22	2.21	2.22	2.2	2.19	2.19	2.15	2.17	2.2	2.16	2.11	2.12	2.02	2.03	2.02
2364	2.24	2.22	2.23	2.21	2.21	2.21	2.16	2.16	2.19	2.14	2.15	2.15	2.07	2.07	2.07	2.02	2.02	2.03	2.24	2.21	2.21	2.22	2.21	2.22	2.2	2.19	2.19	2.15	2.17	2.2	2.16	2.11	2.12	2.02	2.03	2.02
2374	2.24	2.22	2.23	2.21	2.21	2.21	2.16	2.16	2.19	2.14	2.15	2.15	2.07	2.07	2.07	2.02	2.02	2.03	2.24	2.21	2.21	2.22	2.21	2.22	2.2	2.19	2.19	2.15	2.17	2.2	2.16	2.11	2.12	2.02	2.03	2.02
2384	2.24	2.22	2.23	2.21	2.21	2.21	2.16	2.16	2.19	2.14	2.15	2.15	2.07	2.07	2.07	2.02	2.02	2.03	2.24	2.21	2.21	2.22	2.21	2.22	2.2	2.19	2.19	2.15	2.17	2.2	2.16	2.11	2.12	2.02	2.03	2.02
2394	2.24	2.22	2.23	2.21	2.21	2.21	2.16	2.16	2.19	2.14	2.15	2.15	2.07	2.07	2.07	2.02	2.02	2.03	2.24	2.21	2.21	2.22	2.21	2.22	2.2	2.19	2.19	2.15	2.17	2.2	2.16	2.11	2.12	2.02	2.03	2.02
2404	2.24	2.22	2.23	2.21	2.21	2.21	2.16	2.16	2.19	2.14	2.15	2.15	2.07	2.07	2.07	2.02	2.02	2.03	2.24	2.21	2.21	2.22	2.21	2.22	2.2	2.19	2.19	2.15	2.17	2.2	2.16	2.1	2.12	2.02	2.03	2.02
2414	2.24	2.22	2.23	2.21	2.21	2.21	2.16	2.16	2.19	2.14	2.15	2.15	2.07	2.07	2.07	2.02	2.02	2.03	2.24	2.21	2.21	2.22	2.21	2.22	2.2	2.19	2.19	2.15	2.17	2.2	2.16	2.1	2.12	2.01	2.03	2.01
2424	2.24	2.22	2.23	2.21	2.21	2.21	2.16	2.16	2.19	2.14	2.15	2.15	2.07	2.07	2.07	2.01	2.02	2.03	2.24	2.21	2.21	2.22	2.21	2.22	2.2	2.19	2.19	2.15	2.16	2.2	2.16	2.1	2.12	2.01	2.03	2.01
2435	2.24	2.22	2.23	2.21	2.21	2.21	2.16	2.16	2.19	2.14	2.15	2.15	2.07	2.07	2.07	2.01	2.02	2.03	2.24	2.21	2.21	2.22	2.21	2.22	2.2	2.19	2.19	2.15	2.16	2.2	2.16	2.1	2.12	2.01	2.03	2.01
2445	2.24	2.22	2.23	2.21	2.21	2.21	2.16	2.16	2.19	2.14	2.15	2.15	2.07	2.07	2.07	2.01	2.02	2.03	2.24	2.21	2.21	2.22	2.21	2.22	2.2	2.19	2.19	2.15	2.16	2.2	2.16	2.1	2.12	2.01	2.02	2.01
2455	2.23	2.22	2.23	2.21	2.21	2.21	2.16	2.16	2.19	2.14	2.15	2.15	2.07	2.07	2.07	2.01	2.02	2.03	2.24	2.21	2.21	2.22	2.21	2.22	2.2	2.19	2.19	2.15	2.16	2.2	2.16	2.1	2.12	2.01	2.02	2.01
2465	2.23	2.22	2.23	2.21	2.21	2.21	2.16	2.16	2.19	2.14	2.15	2.15	2.07	2.06	2.07	2.01	2.02	2.03	2.24	2.21	2.21	2.22	2.21	2.22	2.2	2.19	2.19	2.15	2.16	2.2	2.16	2.1	2.12	2.01	2.02	2.01
2475	2.23	2.22	2.23	2.21	2.21	2.21	2.16	2.16	2.19	2.14	2.15	2.14	2.07	2.06	2.07	2.01	2.02	2.03	2.24	2.21	2.21	2.22	2.21	2.22	2.2	2.19	2.19	2.15	2.16	2.2	2.16	2.1	2.12	2.01	2.02	2.01
2485	2.23	2.22	2.23	2.21	2.21	2.21	2.16	2.16	2.19	2.14	2.15	2.14	2.07	2.06	2.07	2.01	2.02	2.03	2.24	2.21	2.21	2.22	2.21	2.22	2.2	2.19	2.19	2.15	2.16	2.2	2.16	2.1	2.12	2.01	2.02	2.01
2495	2.23	2.22	2.23	2.21	2.21	2.21	2.16	2.16	2.19	2.14	2.15	2.14	2.07	2.06	2.07	2.01	2.02	2.03	2.24	2.21	2.21	2.22	2.21	2.22	2.2	2.19	2.19	2.15	2.16	2.2	2.16	2.1	2.12	2.01	2.02	2.01
2506	2.23	2.22	2.23	2.21	2.21	2.21	2.16	2.16	2.19	2.14	2.15	2.14	2.06	2.06	2.07	2.01	2.02	2.03	2.24	2.21	2.21	2.22	2.21	2.22	2.2	2.19	2.19	2.15	2.16	2.2	2.15	2.1	2.11	2.01	2.02	2.01
2516	2.23	2.22	2.23	2.21	2.21	2.21	2.16	2.16	2.19	2.14	2.14	2.14	2.06	2.06	2.07	2.01	2.02	2.03	2.24	2.21	2.21	2.22	2.21	2.22	2.2	2.19	2.19	2.15	2.16	2.2	2.15	2.1	2.11	2.01	2.02	2.01
2526	2.23	2.22	2.23	2.21	2.2	2.21	2.16	2.16	2.19	2.14	2.14	2.14	2.06	2.06	2.07	2.01	2.02	2.03	2.24	2.21	2.21	2.22	2.21	2.22	2.2	2.19	2.19	2.15	2.16	2.2	2.15	2.1	2.11	2.01	2.02	2.01
2536	2.23	2.22	2.23	2.21	2.2	2.21	2.16	2.16	2.18	2.14	2.14	2.14	2.06	2.06	2.07	2.01	2.02	2.03	2.24	2.21	2.21	2.22	2.21	2.22	2.2	2.19	2.19	2.15	2.16	2.2	2.15	2.1	2.11	2.01	2.02	2
2546	2.23	2.22	2.23	2.21	2.2	2.21	2.16	2.16	2.18	2.14	2.14	2.14	2.06	2.06	2.07	2.01	2.02	2.03	2.24	2.21	2.21	2.22	2.21	2.22	2.2	2.19	2.19	2.15	2.16	2.2	2.15	2.1	2.11	2	2.02	2
2556	2.23	2.22	2.23	2.21	2.2	2.2	2.16	2.16	2.18	2.14	2.14	2.14	2.06	2.06	2.07	2.01	2.02	2.03	2.24	2.21	2.21	2.22	2.21	2.22	2.2	2.19	2.19	2.15	2.16	2.2	2.15	2.1	2.11	2	2.02	2
2566	2.23	2.22	2.23	2.21	2.2	2.2	2.16	2.16	2.18	2.14	2.14	2.14	2.06	2.06	2.07	2.01	2.02	2.03	2.24	2.21	2.21	2.22	2.21	2.22	2.2	2.19	2.19	2.15	2.16	2.2	2.15	2.1	2.11	2	2.01	2
2577	2.23	2.22	2.23	2.21	2.2	2.2	2.16	2.16	2.18	2.14	2.14	2.14	2.06	2.06	2.07	2.01	2.01	2.02	2.24	2.21	2.21	2.22	2.21	2.22	2.2	2.19	2.19	2.15	2.16	2.2	2.15	2.1	2.11	2	2.01	2
2587	2.23	2.22	2.23	2.21	2.2	2.2	2.16	2.16	2.18	2.14	2.14	2.14	2.06	2.06	2.07	2.01	2.01	2.02	2.24	2.21	2.21	2.22	2.21	2.22	2.2	2.19	2.19	2.15	2.16	2.2	2.15	2.1	2.11	2	2.01	2
2597	2.23	2.22	2.23	2.21	2.2	2.2	2.16	2.16	2.18	2.14	2.14	2.14	2.06	2.06	2.07	2.01	2.01	2.02	2.24	2.21	2.21	2.22	2.21	2.22	2.2	2.19	2.19	2.15	2.16	2.2	2.15	2.1	2.11	2	2.01	2
2607	2.23	2.22	2.23	2.21	2.2	2.2	2.15	2.16	2.18	2.14	2.14	2.14	2.06	2.06	2.07	2.01	2.01	2.02	2.24	2.21	2.21	2.22	2.21	2.22	2.2	2.19	2.19	2.15	2.16	2.2	2.15	2.1	2.11	2	2.01	2
2617	2.23	2.22	2.23	2.21	2.2	2.2	2.15	2.16	2.18	2.14	2.14	2.14	2.06	2.06	2.07	2.01	2.01	2.02	2.24	2.21	2.21	2.22	2.21	2.22	2.2	2.19	2.19	2.15	2.16	2.2	2.15	2.1	2.11	2	2.01	2
2627	2.23	2.22	2.23	2.21	2.2	2.2	2.15	2.16	2.18	2.14	2.14	2.14	2.06	2.06	2.07	2.01	2.01	2.02	2.24	2.21	2.21	2.22	2.21	2.22	2.2	2.19	2.19	2.15	2.16	2.2	2.15	2.09	2.11	2	2.01	2
2637	2.23	2.22	2.23	2.21	2.2	2.2	2.15	2.16	2.18	2.14	2.14	2.14	2.06	2.06	2.07	2.01	2.01	2.02	2.24	2.21	2.21	2.22	2.21	2.22	2.2	2.19	2.19	2.15	2.16	2.2	2.15	2.09	2.11	2	2.01	2
2648	2.23	2.22	2.23	2.21	2.2	2.2	2.15	2.16	2.18	2.14	2.14	2.14	2.06	2.06	2.07	2.01	2.01	2.02	2.24	2.21	2.21	2.22	2.21	2.22	2.2	2.19	2.19	2.15	2.16	2.2	2.15	2.09	2.11	2	2.01	2
2658	2.23	2.22	2.23	2.21	2.2	2.2	2.15	2.16	2.18	2.14	2.14	2.14	2.06	2.06	2.07	2.01	2.01	2.02	2.24	2.21	2.21	2.22	2.21	2.22	2.2	2.19	2.19	2.15	2.16	2.2	2.15	2.09	2.11	2	2.01	2
2668	2.23	2.22	2.23	2.21	2.2	2.2	2.15	2.16	2.18	2.14	2.14	2.14	2.06	2.06	2.07	2.01	2.01	2.02	2.24	2.21	2.21	2.22	2.21	2.22	2.2	2.19	2.19	2.15	2.16	2.2	2.15	2.09	2.11	2	2.01	1.99
2678	2.23	2.22	2.23	2.21	2.2	2.2	2.15	2.16	2.18	2.14	2.14	2.14	2.06	2.06	2.06	2.01	2.01	2.02	2.24	2.21	2.21	2.22	2.21	2.22	2.2	2.19	2.19	2.15	2.16	2.2	2.15	2.09	2.11	2	2	1.99
2688	2.23	2.22	2.23	2.21	2.2	2.2	2.15	2.16	2.18	2.14	2.14	2.14	2.06	2.06	2.06	2	2.01	2.02	2.24	2.21	2.21	2.22	2.21	2.22	2.2	2.19	2.19	2.15	2.16	2.2	2.14	2.09	2.11	1.99	2	1.99
2698	2.23	2.22	2.23	2.21	2.2	2.2	2.15	2.16	2.18	2.14	2.14	2.14	2.06	2.06	2.06	2	2.01	2.02	2.24	2.21	2.21	2.22	2.21	2.22	2.2	2.19	2.19	2.15	2.16	2.2	2.14	2.09	2.11	1.99	2	1.99
2708	2.23	2.22	2.23	2.21	2.2	2.2	2.15	2.16	2.18	2.13	2.14	2.14	2.06	2.06	2.06	2	2.01	2.02	2.24	2.21	2.21	2.22	2.21	2.22	2.2	2.19	2.19	2.15	2.16	2.2	2.14	2.09	2.11	1.99	2	1.99
2719	2.23	2.22	2.23	2.21	2.2	2.2	2.15	2.15	2.18	2.13	2.14	2.14	2.06	2.06	2.06	2	2.01	2.02	2.24	2.21	2.21	2.22	2.21	2.22	2.2	2.19	2.19	2.15	2.16	2.2	2.14	2.09	2.11	1.99	2	1.99
2729	2.23	2.22	2.23	2.21	2.2	2.2	2.15	2.15	2.18	2.13	2.14	2.14	2.06	2.06	2.06	2	2.01	2.02	2.24	2.21	2.21	2.22	2.21	2.22	2.2	2.19	2.19	2.15	2.16	2.2	2.14	2.09	2.11	1.99	2	1.99
2739	2.23	2.22	2.23	2.21	2.2	2.2	2.15	2.15	2.18	2.13	2.14	2.14	2.06	2.06	2.06	2	2.01	2.02	2.24	2.21	2.21	2.22	2.21	2.22	2.2	2.19	2.19	2.15	2.16	2.2	2.14	2.09	2.11	1.99	2	1.99
2749	2.23	2.22	2.23	2.21	2.2	2.2	2.15	2.15	2.18	2.13	2.14	2.14	2.06	2.06	2.06	2	2.01	2.02	2.24	2.21	2.21	2.22	2.21	2.22	2.2	2.19	2.19	2.14	2.16	2.2	2.14	2.09	2.11	1.99	2	1.99
2759	2.23	2.22	2.23	2.21	2.2	2.2	2.15	2.15	2.18	2.13	2.14	2.14	2.06	2.06	2.06	2	2.01	2.02	2.24	2.21	2.21	2.22	2.21	2.22	2.2	2.19	2.19	2.14	2.16	2.2	2.14	2.09	2.1	1.99	2	1.99
2769	2.23	2.22	2.23	2.21	2.2	2.2	2.15	2.15	2.18	2.13	2.14	2.14	2.06	2.06	2.06	2	2.01	2.02	2.24	2.21	2.21	2.22	2.21	2.22	2.2	2.19	2.19	2.14	2.16	2.2	2.14	2.09	2.1	1.99	2	1.99
2780	2.23	2.22	2.23	2.21	2.2	2.2	2.15	2.15	2.18	2.13	2.14	2.14	2.05	2.06	2.06	2	2.01	2.02	2.24	2.21	2.21	2.22	2.21	2.22	2.2	2.19	2.19	2.14	2.16	2.2	2.14	2.09	2.1	1.99	2	1.99
2790	2.23	2.22	2.23	2.2	2.2	2.2	2.15	2.15	2.18	2.13	2.14	2.14	2.05	2.06	2.06	2	2.01	2.02	2.24	2.21	2.21	2.22	2.21	2.22	2.2	2.19	2.19	2.14	2.16	2.2	2.14	2.09	2.1	1.99	2	1.99
2800	2.23	2.22	2.23	2.2	2.2	2.2	2.15	2.15	2.18	2.13	2.14	2.14	2.05	2.06	2.06	2	2.01	2.02	2.24	2.21	2.21	2.22	2.21	2.22	2.2	2.19	2.19	2.14	2.16	2.2	2.14	2.09	2.1	1.99	2	1.99
2810	2.23	2.22	2.23	2.2	2.2	2.2	2.15	2.15	2.18	2.13	2.14	2.14	2.05	2.05	2.06	2	2.01	2.02	2.24	2.21	2.21	2.22	2.21	2.22	2.2	2.19	2.19	2.14	2.16	2.2	2.14	2.09	2.1	1.99	1.99	1.98
2820	2.23	2.22	2.23	2.2	2.2	2.2	2.15	2.15	2.18	2.13	2.14	2.14	2.05	2.05	2.06	2	2.01	2.01	2.24	2.21	2.21	2.22	2.21	2.22	2.2	2.19	2.19	2.14	2.16	2.2	2.14	2.09	2.1	1.98	1.99	1.98
2830	2.23	2.22	2.23	2.2	2.2	2.2	2.15	2.15	2.18	2.13	2.14	2.14	2.05	2.05	2.06	2	2.01	2.01	2.24	2.21	2.21	2.22	2.21	2.22	2.2	2.19	2.19	2.14	2.16	2.2	2.14	2.09	2.1	1.98	1.99	1.98
2840	2.23	2.22	2.23	2.2	2.2	2.2	2.15	2.15	2.18	2.13	2.14	2.14	2.05	2.05	2.06	2	2.01	2.01	2.24	2.21	2.21	2.22	2.21	2.22	2.2	2.19	2.19	2.14	2.16	2.2	2.14	2.09	2.1	1.98	1.99	1.98
2850	2.23	2.22	2.23	2.2	2.2	2.2	2.15	2.15	2.18	2.13	2.14	2.14	2.05	2.05	2.06	2	2.01	2.01	2.24	2.21	2.21	2.22	2.21	2.22	2.2	2.19	2.19	2.14	2.16	2.2	2.14	2.09	2.1	1.98	1.99	1.98
2861	2.23	2.22	2.23	2.2	2.2	2.2	2.15	2.15	2.18	2.13	2.14	2.14	2.05	2.05	2.06	2	2	2.01	2.24	2.21	2.21	2.22	2.21	2.22	2.2	2.19	2.19	2.14	2.16	2.2	2.14	2.09	2.1	1.98	1.99	1.98
2871	2.23	2.22	2.23	2.2	2.2	2.19	2.15	2.15	2.18	2.13	2.14	2.14	2.05	2.05	2.06	2	2	2.01	2.24	2.21	2.21	2.22	2.21	2.22	2.2	2.19	2.19	2.14	2.16	2.2	2.14	2.09	2.1	1.98	1.99	1.98
2881	2.23	2.22	2.23	2.2	2.2	2.19	2.15	2.15	2.18	2.13	2.14	2.14	2.05	2.05	2.06	2	2	2.01	2.24	2.21	2.21	2.22	2.21	2.22	2.2	2.19	2.19	2.14	2.16	2.2	2.14	2.09	2.1	1.98	1.99	1.98
2891	2.23	2.22	2.23	2.2	2.2	2.19	2.15	2.15	2.18	2.13	2.14	2.14	2.05	2.05	2.06	2	2	2.01	2.24	2.21	2.21	2.22	2.21	2.22	2.2	2.19	2.19	2.14	2.16	2.2	2.13	2.08	2.1	1.98	1.99	1.98
2901	2.23	2.22	2.23	2.2	2.2	2.19	2.15	2.15	2.18	2.13	2.14	2.14	2.05	2.05	2.06	2	2	2.01	2.24	2.21	2.21	2.22	2.21	2.22	2.2	2.19	2.19	2.14	2.16	2.2	2.13	2.08	2.1	1.98	1.99	1.98
2911	2.23	2.22	2.23	2.2	2.2	2.19	2.15	2.15	2.18	2.13	2.14	2.14	2.05	2.05	2.06	2	2	2.01	2.24	2.21	2.21	2.22	2.21	2.22	2.19	2.19	2.19	2.14	2.16	2.2	2.13	2.08	2.1	1.98	1.99	1.98
2921	2.23	2.22	2.23	2.2	2.2	2.19	2.15	2.15	2.18	2.13	2.14	2.14	2.05	2.05	2.06	2	2	2.01	2.24	2.21	2.21	2.22	2.21	2.22	2.19	2.19	2.19	2.14	2.16	2.2	2.13	2.08	2.1	1.98	1.99	1.98
2932	2.23	2.22	2.23	2.2	2.2	2.19	2.15	2.15	2.18	2.13	2.14	2.14	2.05	2.05	2.06	2	2	2.01	2.24	2.21	2.21	2.22	2.21	2.22	2.19	2.19	2.19	2.14	2.16	2.2	2.13	2.08	2.1	1.98	1.99	1.98
2942	2.23	2.22	2.23	2.2	2.2	2.19	2.15	2.15	2.18	2.13	2.14	2.14	2.05	2.05	2.06	2	2	2.01	2.24	2.21	2.21	2.22	2.21	2.22	2.19	2.19	2.19	2.14	2.16	2.2	2.13	2.08	2.1	1.98	1.99	1.97
2952	2.23	2.22	2.22	2.2	2.2	2.19	2.15	2.15	2.18	2.13	2.14	2.14	2.05	2.05	2.06	2	2	2.01	2.24	2.21	2.21	2.22	2.21	2.22	2.19	2.19	2.19	2.14	2.16	2.2	2.13	2.08	2.1	1.98	1.99	1.97
2962	2.23	2.22	2.22	2.2	2.2	2.19	2.15	2.15	2.18	2.13	2.13	2.14	2.05	2.05	2.06	2	2	2.01	2.24	2.21	2.21	2.22	2.21	2.22	2.19	2.19	2.19	2.14	2.16	2.2	2.13	2.08	2.1	1.98	1.98	1.97
2972	2.23	2.22	2.22	2.2	2.2	2.19	2.15	2.15	2.18	2.13	2.13	2.14	2.05	2.05	2.06	2	2	2.01	2.24	2.21	2.21	2.22	2.21	2.22	2.19	2.19	2.19	2.14	2.16	2.2	2.13	2.08	2.1	1.97	1.98	1.97
2982	2.23	2.22	2.22	2.2	2.2	2.19	2.15	2.15	2.18	2.13	2.13	2.14	2.05	2.05	2.06	2	2	2.01	2.24	2.21	2.21	2.22	2.21	2.22	2.19	2.18	2.19	2.14	2.16	2.2	2.13	2.08	2.1	1.97	1.98	1.97
2993	2.23	2.21	2.22	2.2	2.2	2.19	2.15	2.15	2.18	2.13	2.13	2.14	2.05	2.05	2.06	1.99	2	2.01	2.24	2.21	2.21	2.22	2.21	2.22	2.19	2.18	2.19	2.14	2.16	2.2	2.13	2.08	2.1	1.97	1.98	1.97
3003	2.23	2.21	2.22	2.2	2.2	2.19	2.15	2.15	2.18	2.13	2.13	2.14	2.05	2.05	2.06	1.99	2	2.01	2.24	2.21	2.21	2.22	2.21	2.22	2.19	2.18	2.19	2.14	2.16	2.2	2.13	2.08	2.1	1.97	1.98	1.97
3013	2.23	2.21	2.22	2.2	2.2	2.19	2.15	2.15	2.18	2.13	2.13	2.14	2.05	2.05	2.06	1.99	2	2.01	2.24	2.21	2.21	2.22	2.21	2.22	2.19	2.18	2.19	2.14	2.16	2.2	2.13	2.08	2.1	1.97	1.98	1.97
3023	2.22	2.21	2.22	2.2	2.2	2.19	2.14	2.15	2.18	2.13	2.13	2.13	2.05	2.05	2.06	1.99	2	2.01	2.24	2.21	2.21	2.22	2.21	2.22	2.19	2.18	2.19	2.14	2.16	2.2	2.13	2.08	2.09	1.97	1.98	1.97
3033	2.22	2.21	2.22	2.2	2.2	2.19	2.14	2.15	2.18	2.13	2.13	2.13	2.05	2.05	2.06	1.99	2	2.01	2.24	2.21	2.21	2.22	2.21	2.22	2.19	2.18	2.19	2.14	2.16	2.2	2.13	2.08	2.09	1.97	1.98	1.97
3043	2.22	2.21	2.22	2.2	2.2	2.19	2.14	2.15	2.18	2.13	2.13	2.13	2.05	2.05	2.06	1.99	2	2.01	2.24	2.21	2.21	2.22	2.21	2.22	2.19	2.18	2.19	2.14	2.16	2.2	2.13	2.08	2.09	1.97	1.98	1.97
3053	2.22	2.21	2.22	2.2	2.2	2.19	2.14	2.15	2.18	2.13	2.13	2.13	2.05	2.05	2.06	1.99	2	2.01	2.24	2.21	2.21	2.22	2.21	2.22	2.19	2.18	2.19	2.14	2.16	2.2	2.13	2.08	2.09	1.97	1.98	1.97
3064	2.22	2.21	2.22	2.2	2.2	2.19	2.14	2.15	2.18	2.13	2.13	2.13	2.05	2.05	2.06	1.99	2	2.01	2.24	2.21	2.21	2.22	2.21	2.22	2.19	2.18	2.19	2.14	2.16	2.2	2.13	2.08	2.09	1.97	1.98	1.97
3074	2.22	2.21	2.22	2.2	2.2	2.19	2.14	2.15	2.18	2.13	2.13	2.13	2.05	2.05	2.06	1.99	2	2.01	2.24	2.21	2.21	2.22	2.21	2.22	2.19	2.18	2.19	2.14	2.16	2.2	2.13	2.08	2.09	1.97	1.98	1.97
3084	2.22	2.21	2.22	2.2	2.2	2.19	2.14	2.15	2.18	2.13	2.13	2.13	2.05	2.05	2.06	1.99	2	2.01	2.24	2.21	2.21	2.22	2.21	2.22	2.19	2.18	2.19	2.14	2.16	2.2	2.13	2.08	2.09	1.97	1.98	1.97
3094	2.22	2.21	2.22	2.2	2.2	2.19	2.14	2.15	2.18	2.13	2.13	2.13	2.04	2.05	2.05	1.99	2	2.01	2.24	2.21	2.21	2.22	2.21	2.22	2.19	2.18	2.19	2.14	2.16	2.2	2.12	2.08	2.09	1.97	1.98	1.96
3104	2.22	2.21	2.22	2.2	2.2	2.19	2.14	2.15	2.18	2.13	2.13	2.13	2.04	2.05	2.05	1.99	2	2.01	2.24	2.21	2.21	2.22	2.21	2.22	2.19	2.18	2.19	2.14	2.16	2.2	2.12	2.08	2.09	1.97	1.98	1.96
3114	2.22	2.21	2.22	2.2	2.2	2.19	2.14	2.15	2.18	2.13	2.13	2.13	2.04	2.05	2.05	1.99	2	2.01	2.24	2.21	2.21	2.22	2.21	2.22	2.19	2.18	2.19	2.14	2.16	2.2	2.12	2.08	2.09	1.97	1.97	1.96
3124	2.22	2.21	2.22	2.2	2.2	2.19	2.14	2.15	2.18	2.13	2.13	2.13	2.04	2.05	2.05	1.99	2	2.01	2.24	2.21	2.21	2.22	2.21	2.22	2.19	2.18	2.19	2.14	2.16	2.2	2.12	2.08	2.09	1.97	1.97	1.96
3135	2.22	2.21	2.22	2.2	2.2	2.19	2.14	2.15	2.18	2.13	2.13	2.13	2.04	2.05	2.05	1.99	2	2	2.24	2.21	2.21	2.22	2.21	2.22	2.19	2.18	2.19	2.14	2.16	2.2	2.12	2.08	2.09	1.96	1.97	1.96
3145	2.22	2.21	2.22	2.2	2.2	2.19	2.14	2.15	2.18	2.13	2.13	2.13	2.04	2.05	2.05	1.99	2	2	2.24	2.21	2.21	2.22	2.21	2.22	2.19	2.18	2.19	2.14	2.16	2.2	2.12	2.07	2.09	1.96	1.97	1.96
3155	2.22	2.21	2.22	2.2	2.2	2.19	2.14	2.15	2.18	2.13	2.13	2.13	2.04	2.05	2.05	1.99	2	2	2.24	2.21	2.21	2.22	2.21	2.22	2.19	2.18	2.19	2.14	2.16	2.2	2.12	2.07	2.09	1.96	1.97	1.96
3165	2.22	2.21	2.22	2.2	2.2	2.19	2.14	2.15	2.18	2.13	2.13	2.13	2.04	2.05	2.05	1.99	1.99	2	2.24	2.21	2.21	2.22	2.21	2.22	2.19	2.18	2.19	2.14	2.16	2.2	2.12	2.07	2.09	1.96	1.97	1.96
3175	2.22	2.21	2.22	2.2	2.2	2.19	2.14	2.15	2.17	2.13	2.13	2.13	2.04	2.05	2.05	1.99	1.99	2	2.24	2.21	2.21	2.22	2.21	2.22	2.19	2.18	2.19	2.14	2.16	2.2	2.12	2.07	2.09	1.96	1.97	1.96
3185	2.22	2.21	2.22	2.2	2.2	2.19	2.14	2.15	2.17	2.13	2.13	2.13	2.04	2.05	2.05	1.99	1.99	2	2.24	2.21	2.21	2.22	2.21	2.22	2.19	2.18	2.19	2.14	2.16	2.2	2.12	2.07	2.09	1.96	1.97	1.96
3195	2.22	2.21	2.22	2.2	2.2	2.18	2.14	2.15	2.17	2.13	2.13	2.13	2.04	2.05	2.05	1.99	1.99	2	2.24	2.21	2.21	2.22	2.21	2.22	2.19	2.18	2.19	2.14	2.16	2.2	2.12	2.07	2.09	1.96	1.97	1.96
3206	2.22	2.21	2.22	2.2	2.2	2.18	2.14	2.15	2.17	2.13	2.13	2.13	2.04	2.05	2.05	1.99	1.99	2	2.24	2.21	2.21	2.22	2.21	2.22	2.19	2.18	2.19	2.14	2.16	2.2	2.12	2.07	2.09	1.96	1.97	1.96
3216	2.22	2.21	2.22	2.2	2.2	2.18	2.14	2.15	2.17	2.13	2.13	2.13	2.04	2.05	2.05	1.99	1.99	2	2.24	2.21	2.21	2.22	2.21	2.22	2.19	2.18	2.19	2.14	2.16	2.2	2.12	2.07	2.09	1.96	1.97	1.96
3226	2.22	2.21	2.22	2.2	2.2	2.18	2.14	2.15	2.17	2.13	2.13	2.13	2.04	2.04	2.05	1.99	1.99	2	2.24	2.21	2.21	2.22	2.21	2.22	2.19	2.18	2.19	2.14	2.16	2.2	2.12	2.07	2.09	1.96	1.97	1.96
3236	2.22	2.21	2.22	2.2	2.2	2.18	2.14	2.14	2.17	2.12	2.13	2.13	2.04	2.04	2.05	1.99	1.99	2	2.24	2.21	2.21	2.22	2.21	2.22	2.19	2.18	2.19	2.13	2.16	2.2	2.12	2.07	2.09	1.96	1.97	1.96
3246	2.22	2.21	2.22	2.2	2.2	2.18	2.14	2.14	2.17	2.12	2.13	2.13	2.04	2.04	2.05	1.99	1.99	2	2.24	2.21	2.21	2.22	2.21	2.22	2.19	2.18	2.19	2.13	2.16	2.2	2.12	2.07	2.09	1.96	1.97	1.96
3256	2.22	2.21	2.22	2.2	2.2	2.18	2.14	2.14	2.17	2.12	2.13	2.13	2.04	2.04	2.05	1.99	1.99	2	2.24	2.21	2.21	2.22	2.21	2.22	2.19	2.18	2.19	2.13	2.16	2.2	2.12	2.07	2.09	1.96	1.97	1.95
3266	2.22	2.21	2.22	2.2	2.2	2.18	2.14	2.14	2.17	2.12	2.13	2.13	2.04	2.04	2.05	1.99	1.99	2	2.24	2.21	2.21	2.22	2.21	2.22	2.19	2.18	2.19	2.13	2.16	2.2	2.12	2.07	2.09	1.96	1.97	1.95
3277	2.22	2.21	2.22	2.2	2.2	2.18	2.14	2.14	2.17	2.12	2.13	2.13	2.04	2.04	2.05	1.99	1.99	2	2.24	2.21	2.21	2.22	2.21	2.22	2.19	2.18	2.19	2.13	2.16	2.2	2.12	2.07	2.09	1.96	1.97	1.95
3287	2.22	2.21	2.22	2.2	2.2	2.18	2.14	2.14	2.17	2.12	2.13	2.13	2.04	2.04	2.05	1.99	1.99	2	2.24	2.21	2.21	2.22	2.21	2.22	2.19	2.18	2.19	2.13	2.16	2.2	2.12	2.07	2.09	1.96	1.96	1.95
3297	2.22	2.21	2.22	2.2	2.2	2.18	2.14	2.14	2.17	2.12	2.13	2.13	2.04	2.04	2.05	1.99	1.99	2	2.24	2.21	2.21	2.22	2.21	2.22	2.19	2.18	2.19	2.13	2.16	2.2	2.12	2.07	2.09	1.95	1.96	1.95
3307	2.22	2.21	2.22	2.2	2.2	2.18	2.14	2.14	2.17	2.12	2.13	2.13	2.04	2.04	2.05	1.99	1.99	2	2.24	2.21	2.21	2.22	2.21	2.22	2.19	2.18	2.19	2.13	2.16	2.2	2.12	2.07	2.08	1.95	1.96	1.95
3317	2.22	2.21	2.22	2.2	2.2	2.18	2.14	2.14	2.17	2.12	2.13	2.13	2.04	2.04	2.05	1.99	1.99	2	2.24	2.21	2.21	2.22	2.21	2.22	2.19	2.18	2.19	2.13	2.16	2.2	2.12	2.07	2.08	1.95	1.96	1.95
3327	2.22	2.21	2.22	2.2	2.2	2.18	2.14	2.14	2.17	2.12	2.13	2.13	2.04	2.04	2.05	1.99	1.99	2	2.24	2.21	2.21	2.22	2.21	2.22	2.19	2.18	2.19	2.13	2.16	2.2	2.11	2.07	2.08	1.95	1.96	1.95
3337	2.22	2.21	2.22	2.2	2.2	2.18	2.14	2.14	2.17	2.12	2.13	2.13	2.04	2.04	2.05	1.99	1.99	2	2.24	2.21	2.21	2.22	2.21	2.22	2.19	2.18	2.19	2.13	2.16	2.2	2.11	2.07	2.08	1.95	1.96	1.95
3348	2.22	2.21	2.22	2.2	2.2	2.18	2.14	2.14	2.17	2.12	2.13	2.13	2.04	2.04	2.05	1.99	1.99	2	2.24	2.21	2.21	2.22	2.21	2.22	2.19	2.18	2.19	2.13	2.16	2.2	2.11	2.07	2.08	1.95	1.96	1.95
3358	2.22	2.21	2.22	2.2	2.2	2.18	2.14	2.14	2.17	2.12	2.13	2.13	2.04	2.04	2.05	1.99	1.99	2	2.24	2.21	2.21	2.22	2.21	2.22	2.19	2.18	2.19	2.13	2.16	2.2	2.11	2.07	2.08	1.95	1.96	1.95
3368	2.22	2.21	2.22	2.2	2.2	2.18	2.14	2.14	2.17	2.12	2.13	2.13	2.04	2.04	2.05	1.98	1.99	2	2.24	2.21	2.21	2.22	2.21	2.22	2.19	2.18	2.19	2.13	2.16	2.2	2.11	2.07	2.08	1.95	1.96	1.95
3378	2.22	2.21	2.22	2.2	2.2	2.18	2.14	2.14	2.17	2.12	2.13	2.13	2.04	2.04	2.05	1.98	1.99	2	2.23	2.21	2.21	2.22	2.21	2.22	2.19	2.18	2.18	2.13	2.16	2.2	2.11	2.07	2.08	1.95	1.96	1.95
3388	2.22	2.21	2.22	2.2	2.2	2.18	2.14	2.14	2.17	2.12	2.13	2.13	2.04	2.04	2.05	1.98	1.99	2	2.23	2.21	2.21	2.22	2.21	2.22	2.19	2.18	2.18	2.13	2.16	2.2	2.11	2.07	2.08	1.95	1.96	1.95
3398	2.22	2.21	2.22	2.2	2.2	2.18	2.14	2.14	2.17	2.12	2.13	2.13	2.04	2.04	2.05	1.98	1.99	2	2.23	2.21	2.21	2.22	2.21	2.22	2.19	2.18	2.18	2.13	2.16	2.2	2.11	2.07	2.08	1.95	1.96	1.95
3408	2.22	2.21	2.22	2.2	2.2	2.18	2.14	2.14	2.17	2.12	2.13	2.13	2.04	2.04	2.05	1.98	1.99	2	2.23	2.21	2.21	2.22	2.21	2.22	2.19	2.18	2.18	2.13	2.16	2.2	2.11	2.07	2.08	1.95	1.96	1.95
3419	2.22	2.21	2.22	2.2	2.2	2.18	2.14	2.14	2.17	2.12	2.13	2.13	2.04	2.04	2.05	1.98	1.99	2	2.23	2.2	2.21	2.22	2.21	2.22	2.19	2.18	2.18	2.13	2.16	2.2	2.11	2.06	2.08	1.95	1.96	1.94
3429	2.22	2.21	2.22	2.2	2.2	2.18	2.14	2.14	2.17	2.12	2.13	2.13	2.04	2.04	2.05	1.98	1.99	2	2.23	2.2	2.21	2.22	2.21	2.22	2.19	2.18	2.18	2.13	2.16	2.2	2.11	2.06	2.08	1.95	1.96	1.94
3439	2.22	2.21	2.22	2.2	2.2	2.18	2.14	2.14	2.17	2.12	2.13	2.13	2.04	2.04	2.05	1.98	1.99	2	2.23	2.2	2.21	2.21	2.21	2.22	2.19	2.18	2.18	2.13	2.16	2.2	2.11	2.06	2.08	1.95	1.96	1.94
3449	2.22	2.21	2.22	2.2	2.2	2.18	2.14	2.14	2.17	2.12	2.13	2.13	2.03	2.04	2.05	1.98	1.99	2	2.23	2.2	2.21	2.21	2.21	2.22	2.19	2.18	2.18	2.13	2.16	2.2	2.11	2.06	2.08	1.95	1.96	1.94
3459	2.22	2.21	2.22	2.2	2.2	2.18	2.14	2.14	2.17	2.12	2.13	2.13	2.03	2.04	2.05	1.98	1.99	1.99	2.23	2.2	2.21	2.21	2.21	2.22	2.19	2.18	2.18	2.13	2.16	2.2	2.11	2.06	2.08	1.95	1.96	1.94
3469	2.22	2.21	2.22	2.2	2.2	2.18	2.14	2.14	2.17	2.12	2.13	2.13	2.03	2.04	2.05	1.98	1.99	1.99	2.23	2.2	2.21	2.21	2.21	2.22	2.19	2.18	2.18	2.13	2.16	2.2	2.11	2.06	2.08	1.95	1.95	1.94
3480	2.22	2.21	2.22	2.2	2.2	2.18	2.14	2.14	2.17	2.12	2.13	2.13	2.03	2.04	2.05	1.98	1.99	1.99	2.23	2.2	2.21	2.21	2.21	2.22	2.19	2.18	2.18	2.13	2.16	2.2	2.11	2.06	2.08	1.94	1.95	1.94
3490	2.22	2.21	2.22	2.2	2.2	2.18	2.14	2.14	2.17	2.12	2.13	2.13	2.03	2.04	2.05	1.98	1.99	1.99	2.23	2.2	2.21	2.21	2.21	2.22	2.19	2.18	2.18	2.13	2.16	2.2	2.11	2.06	2.08	1.94	1.95	1.94
3500	2.22	2.21	2.22	2.2	2.2	2.18	2.14	2.14	2.17	2.12	2.13	2.13	2.03	2.04	2.05	1.98	1.99	1.99	2.23	2.2	2.21	2.21	2.21	2.22	2.19	2.18	2.18	2.13	2.16	2.2	2.11	2.06	2.08	1.94	1.95	1.94
3510	2.22	2.21	2.22	2.2	2.2	2.18	2.14	2.14	2.17	2.12	2.13	2.13	2.03	2.04	2.05	1.98	1.98	1.99	2.23	2.2	2.21	2.21	2.21	2.22	2.19	2.18	2.18	2.13	2.16	2.2	2.11	2.06	2.08	1.94	1.95	1.94
3520	2.22	2.21	2.22	2.2	2.2	2.18	2.13	2.14	2.17	2.12	2.13	2.13	2.03	2.04	2.05	1.98	1.98	1.99	2.23	2.2	2.21	2.21	2.21	2.22	2.19	2.18	2.18	2.13	2.16	2.2	2.11	2.06	2.08	1.94	1.95	1.94
3530	2.22	2.21	2.22	2.2	2.2	2.18	2.13	2.14	2.17	2.12	2.13	2.13	2.03	2.04	2.05	1.98	1.98	1.99	2.23	2.2	2.21	2.21	2.21	2.22	2.19	2.18	2.18	2.13	2.16	2.2	2.11	2.06	2.08	1.94	1.95	1.94
3540	2.22	2.21	2.22	2.2	2.2	2.18	2.13	2.14	2.17	2.12	2.13	2.13	2.03	2.04	2.05	1.98	1.98	1.99	2.23	2.2	2.21	2.21	2.21	2.22	2.19	2.18	2.18	2.13	2.16	2.2	2.11	2.06	2.08	1.94	1.95	1.94
3551	2.22	2.21	2.22	2.2	2.2	2.17	2.13	2.14	2.17	2.12	2.13	2.13	2.03	2.04	2.05	1.98	1.98	1.99	2.23	2.2	2.21	2.21	2.21	2.22	2.19	2.18	2.18	2.13	2.16	2.2	2.1	2.06	2.08	1.94	1.95	1.94
3561	2.22	2.21	2.22	2.2	2.2	2.17	2.13	2.14	2.17	2.12	2.13	2.13	2.03	2.04	2.05	1.98	1.98	1.99	2.23	2.2	2.21	2.21	2.21	2.22	2.19	2.18	2.18	2.13	2.16	2.19	2.1	2.06	2.08	1.94	1.95	1.94
3571	2.22	2.21	2.22	2.2	2.2	2.17	2.13	2.14	2.17	2.12	2.12	2.13	2.03	2.04	2.05	1.98	1.98	1.99	2.23	2.2	2.21	2.21	2.21	2.22	2.19	2.18	2.18	2.13	2.16	2.19	2.1	2.06	2.08	1.94	1.95	1.94
3581	2.22	2.21	2.22	2.2	2.2	2.17	2.13	2.14	2.17	2.12	2.12	2.13	2.03	2.04	2.05	1.98	1.98	1.99	2.23	2.2	2.21	2.21	2.21	2.22	2.19	2.18	2.18	2.13	2.16	2.19	2.1	2.06	2.08	1.94	1.95	1.94
3591	2.22	2.21	2.22	2.2	2.2	2.17	2.13	2.14	2.17	2.12	2.12	2.13	2.03	2.04	2.05	1.98	1.98	1.99	2.23	2.2	2.21	2.21	2.21	2.22	2.19	2.18	2.18	2.13	2.16	2.19	2.1	2.06	2.08	1.94	1.95	1.94
3601	2.22	2.21	2.22	2.2	2.2	2.17	2.13	2.14	2.17	2.12	2.12	2.13	2.03	2.04	2.05	1.98	1.98	1.99	2.23	2.2	2.21	2.21	2.21	2.22	2.19	2.18	2.18	2.13	2.16	2.19	2.1	2.06	2.08	1.94	1.95	1.94

## Sheet: TGA - non-isothermal condition
The table presents the results of a thermogravimetric analysis performed in non-isothermal conditions. The materials sample 2.25 g was placed into a reactor which was heated form 20 °C to 850 °C. Analysis has been done in three replications.
Time, s	Temperature, °C	Sewage sludge			Digestate
0	24.5	2.25	2.25	2.25	2.25	2.25	2.25
10	26.3056	2.25	2.25	2.25	2.25	2.25	2.25
20	28.1111	2.25	2.25	2.25	2.25	2.25	2.25
30	29.9167	2.25	2.25	2.25	2.25	2.25	2.25
40	31.7222	2.25	2.25	2.25	2.25	2.25	2.25
51	33.7083	2.25	2.25	2.25	2.25	2.25	2.25
61	35.5139	2.25	2.25	2.25	2.25	2.25	2.25
71	37.3194	2.25	2.25	2.25	2.25	2.25	2.25
81	39.125	2.25	2.25	2.25	2.25	2.25	2.25
91	40.9306	2.25	2.25	2.25	2.25	2.25	2.25
101	42.7361	2.25	2.25	2.25	2.25	2.25	2.25
111	44.5417	2.25	2.25	2.25	2.25	2.25	2.25
122	46.5278	2.25	2.25	2.25	2.25	2.25	2.25
132	48.3333	2.25	2.25	2.25	2.25	2.25	2.25
142	50.1389	2.25	2.25	2.25	2.25	2.25	2.25
152	51.9444	2.25	2.25	2.25	2.25	2.25	2.25
162	53.75	2.25	2.25	2.25	2.25	2.25	2.25
172	55.5556	2.25	2.25	2.25	2.25	2.25	2.25
182	57.3611	2.25	2.25	2.25	2.25	2.25	2.25
193	59.3472	2.25	2.25	2.25	2.25	2.25	2.25
203	61.1528	2.25	2.25	2.25	2.25	2.25	2.25
213	62.9583	2.25	2.25	2.25	2.25	2.25	2.25
223	64.7639	2.25	2.25	2.25	2.25	2.25	2.25
233	66.5694	2.25	2.25	2.25	2.25	2.25	2.25
243	68.375	2.25	2.25	2.25	2.25	2.25	2.25
253	70.1806	2.25	2.25	2.25	2.25	2.25	2.25
264	72.1667	2.25	2.25	2.25	2.25	2.25	2.25
274	73.9722	2.25	2.25	2.25	2.25	2.25	2.25
284	75.7778	2.25	2.25	2.25	2.25	2.25	2.25
294	77.5833	2.25	2.25	2.25	2.25	2.25	2.25
304	79.3889	2.25	2.25	2.25	2.25	2.25	2.25
314	81.1944	2.25	2.25	2.25	2.25	2.25	2.25
325	83	2.25	2.25	2.25	2.25	2.25	2.25
335	84.9861	2.25	2.25	2.25	2.25	2.25	2.25
345	86.7917	2.25	2.25	2.25	2.25	2.25	2.25
355	88.5972	2.25	2.25	2.25	2.25	2.25	2.25
365	90.4028	2.25	2.25	2.25	2.25	2.25	2.25
375	92.2083	2.25	2.25	2.25	2.25	2.25	2.25
385	94.0139	2.25	2.25	2.25	2.25	2.25	2.25
395	95.8194	2.25	2.25	2.25	2.25	2.25	2.25
406	97.8056	2.25	2.25	2.25	2.25	2.25	2.25
416	99.6111	2.25	2.25	2.25	2.25	2.25	2.25
426	101.417	2.25	2.25	2.25	2.25	2.25	2.25
436	103.222	2.25	2.25	2.25	2.25	2.25	2.25
446	105.028	2.25	2.25	2.25	2.25	2.25	2.25
456	106.833	2.25	2.25	2.25	2.25	2.25	2.25
466	108.639	2.25	2.25	2.25	2.25	2.25	2.25
477	110.625	2.25	2.25	2.25	2.25	2.25	2.25
487	112.431	2.25	2.25	2.25	2.25	2.25	2.25
497	114.236	2.25	2.25	2.25	2.25	2.25	2.25
507	116.042	2.25	2.25	2.25	2.25	2.25	2.25
517	117.847	2.25	2.25	2.25	2.25	2.25	2.25
527	119.653	2.25	2.25	2.25	2.25	2.25	2.25
537	121.458	2.25	2.25	2.25	2.25	2.25	2.25
548	123.444	2.25	2.25	2.25	2.25	2.25	2.25
558	125.25	2.25	2.25	2.25	2.25	2.25	2.25
568	127.056	2.25	2.25	2.25	2.25	2.25	2.25
578	128.861	2.25	2.25	2.25	2.25	2.25	2.25
588	130.667	2.25	2.25	2.25	2.25	2.25	2.25
598	132.472	2.25	2.25	2.25	2.25	2.25	2.25
608	134.458	2.25	2.25	2.25	2.25	2.25	2.25
619	136.264	2.25	2.25	2.25	2.25	2.25	2.25
629	138.069	2.25	2.25	2.25	2.25	2.25	2.25
639	139.875	2.25	2.25	2.25	2.25	2.25	2.25
649	141.681	2.25	2.25	2.25	2.25	2.25	2.25
659	143.486	2.25	2.25	2.25	2.25	2.25	2.25
669	145.292	2.25	2.25	2.25	2.25	2.25	2.25
679	147.278	2.25	2.25	2.25	2.25	2.25	2.25
690	149.083	2.25	2.25	2.25	2.25	2.25	2.25
700	150.889	2.25	2.25	2.25	2.25	2.25	2.25
710	152.694	2.25	2.25	2.25	2.25	2.25	2.25
720	154.5	2.25	2.25	2.25	2.25	2.25	2.25
730	156.306	2.25	2.25	2.25	2.25	2.25	2.25
740	158.111	2.25	2.25	2.25	2.25	2.25	2.25
751	160.097	2.25	2.25	2.25	2.25	2.25	2.25
761	161.903	2.25	2.25	2.25	2.25	2.25	2.25
771	163.708	2.25	2.25	2.25	2.25	2.25	2.25
781	165.514	2.25	2.25	2.25	2.25	2.25	2.25
791	167.319	2.25	2.25	2.25	2.25	2.25	2.25
801	169.125	2.25	2.25	2.25	2.25	2.25	2.25
811	170.931	2.25	2.25	2.25	2.25	2.25	2.25
822	172.917	2.25	2.25	2.25	2.25	2.25	2.25
832	174.722	2.25	2.25	2.25	2.25	2.25	2.25
842	176.528	2.25	2.25	2.25	2.25	2.25	2.25
852	178.333	2.25	2.25	2.25	2.25	2.25	2.25
862	180.139	2.25	2.25	2.25	2.25	2.25	2.25
872	181.944	2.25	2.25	2.25	2.25	2.25	2.25
882	183.75	2.25	2.25	2.25	2.25	2.25	2.25
893	185.556	2.25	2.25	2.25	2.25	2.25	2.25
903	187.542	2.25	2.25	2.25	2.25	2.25	2.25
913	189.347	2.25	2.25	2.25	2.25	2.25	2.25
923	191.153	2.25	2.25	2.25	2.25	2.25	2.25
933	192.958	2.25	2.25	2.25	2.25	2.25	2.25
943	194.764	2.25	2.25	2.25	2.25	2.25	2.25
953	196.569	2.25	2.25	2.25	2.25	2.25	2.25
964	198.556	2.25	2.25	2.25	2.25	2.25	2.25
974	200.361	2.25	2.25	2.25	2.25	2.25	2.25
984	202.167	2.25	2.25	2.25	2.25	2.25	2.25
994	203.972	2.25	2.25	2.25	2.25	2.25	2.25
1004	205.778	2.25	2.25	2.25	2.25	2.25	2.25
1014	207.583	2.25	2.25	2.25	2.25	2.25	2.25
1024	209.389	2.25	2.25	2.25	2.25	2.25	2.25
1035	211.375	2.25	2.25	2.25	2.25	2.25	2.25
1045	213.181	2.25	2.25	2.25	2.25	2.25	2.25
1055	214.986	2.25	2.25	2.25	2.25	2.25	2.25
1065	216.792	2.25	2.25	2.25	2.25	2.25	2.25
1075	218.597	2.25	2.25	2.25	2.25	2.25	2.25
1085	220.403	2.25	2.25	2.25	2.25	2.25	2.25
1095	222.208	2.25	2.25	2.25	2.25	2.25	2.25
1106	224.194	2.25	2.25	2.24	2.25	2.25	2.25
1116	226	2.25	2.25	2.24	2.25	2.25	2.25
1126	227.806	2.25	2.25	2.24	2.25	2.25	2.25
1136	229.611	2.25	2.25	2.24	2.25	2.25	2.25
1146	231.417	2.25	2.25	2.24	2.25	2.25	2.25
1156	233.222	2.25	2.25	2.24	2.25	2.25	2.25
1167	235.028	2.25	2.25	2.24	2.25	2.25	2.25
1177	237.014	2.25	2.25	2.24	2.25	2.25	2.25
1187	238.819	2.25	2.25	2.24	2.25	2.25	2.25
1197	240.625	2.25	2.25	2.24	2.25	2.25	2.25
1207	242.431	2.25	2.25	2.24	2.25	2.25	2.25
1217	244.236	2.25	2.25	2.24	2.25	2.25	2.25
1227	246.042	2.25	2.25	2.24	2.25	2.25	2.25
1238	247.847	2.25	2.25	2.24	2.25	2.25	2.25
1248	249.833	2.25	2.25	2.24	2.25	2.25	2.25
1258	251.639	2.25	2.25	2.24	2.25	2.25	2.25
1268	253.444	2.25	2.25	2.24	2.25	2.25	2.25
1278	255.25	2.25	2.25	2.24	2.25	2.25	2.25
1288	257.056	2.25	2.25	2.24	2.25	2.25	2.25
1298	258.861	2.25	2.25	2.24	2.25	2.25	2.25
1309	260.667	2.25	2.25	2.24	2.25	2.25	2.25
1319	262.653	2.25	2.25	2.24	2.25	2.25	2.25
1329	264.458	2.25	2.25	2.24	2.25	2.25	2.25
1339	266.264	2.25	2.25	2.24	2.25	2.25	2.25
1349	268.069	2.25	2.25	2.24	2.25	2.25	2.24
1359	269.875	2.25	2.24	2.24	2.25	2.25	2.24
1369	271.681	2.25	2.24	2.24	2.25	2.25	2.24
1380	273.486	2.25	2.24	2.24	2.25	2.25	2.24
1390	275.472	2.25	2.24	2.24	2.25	2.25	2.24
1400	277.278	2.25	2.24	2.24	2.25	2.25	2.24
1410	279.083	2.25	2.24	2.24	2.25	2.25	2.24
1420	280.889	2.25	2.24	2.24	2.25	2.25	2.24
1430	282.694	2.25	2.24	2.24	2.25	2.25	2.24
1440	284.5	2.25	2.24	2.24	2.25	2.25	2.24
1451	286.306	2.25	2.24	2.24	2.25	2.25	2.24
1461	288.292	2.25	2.24	2.24	2.25	2.25	2.24
1471	290.097	2.25	2.24	2.24	2.25	2.25	2.24
1481	291.903	2.25	2.23	2.24	2.25	2.24	2.24
1491	293.708	2.25	2.23	2.24	2.25	2.24	2.24
1501	295.514	2.25	2.23	2.24	2.25	2.24	2.24
1511	297.319	2.25	2.23	2.24	2.25	2.24	2.24
1522	299.125	2.25	2.23	2.24	2.25	2.24	2.24
1532	301.111	2.25	2.23	2.24	2.25	2.24	2.24
1542	302.917	2.25	2.23	2.24	2.25	2.24	2.24
1552	304.722	2.25	2.23	2.24	2.25	2.24	2.24
1562	306.528	2.25	2.23	2.23	2.25	2.24	2.24
1572	308.333	2.25	2.22	2.23	2.25	2.24	2.24
1582	310.139	2.25	2.22	2.23	2.25	2.24	2.24
1593	311.944	2.24	2.22	2.23	2.25	2.24	2.24
1603	313.931	2.24	2.22	2.23	2.25	2.24	2.24
1613	315.736	2.24	2.22	2.23	2.25	2.24	2.24
1623	317.542	2.24	2.22	2.23	2.25	2.24	2.24
1633	319.347	2.24	2.21	2.23	2.25	2.24	2.24
1643	321.153	2.24	2.21	2.23	2.24	2.24	2.24
1654	322.958	2.24	2.21	2.23	2.24	2.24	2.24
1664	324.764	2.24	2.21	2.23	2.24	2.24	2.24
1674	326.75	2.24	2.21	2.22	2.24	2.24	2.24
1684	328.556	2.24	2.21	2.22	2.24	2.24	2.24
1694	330.361	2.24	2.2	2.22	2.24	2.24	2.24
1704	332.167	2.24	2.2	2.22	2.24	2.24	2.24
1714	333.972	2.24	2.2	2.22	2.24	2.24	2.24
1725	335.778	2.24	2.2	2.22	2.24	2.24	2.23
1735	337.583	2.24	2.2	2.21	2.24	2.24	2.23
1745	339.569	2.23	2.2	2.21	2.24	2.24	2.23
1755	341.375	2.23	2.19	2.21	2.24	2.24	2.23
1765	343.181	2.23	2.19	2.21	2.24	2.24	2.23
1775	344.986	2.23	2.19	2.21	2.24	2.24	2.23
1785	346.792	2.23	2.19	2.21	2.24	2.24	2.23
1796	348.597	2.23	2.19	2.2	2.24	2.24	2.23
1806	350.403	2.23	2.18	2.2	2.24	2.24	2.23
1816	352.389	2.23	2.18	2.2	2.24	2.24	2.23
1826	354.194	2.22	2.18	2.2	2.24	2.24	2.23
1836	356	2.22	2.18	2.19	2.24	2.23	2.23
1846	357.806	2.22	2.18	2.19	2.24	2.23	2.23
1856	359.611	2.22	2.17	2.19	2.23	2.23	2.23
1867	361.417	2.22	2.17	2.19	2.23	2.23	2.22
1877	363.222	2.21	2.17	2.18	2.23	2.23	2.22
1887	365.208	2.21	2.17	2.18	2.23	2.23	2.22
1897	367.014	2.21	2.16	2.18	2.23	2.23	2.22
1907	368.819	2.21	2.16	2.18	2.23	2.23	2.22
1917	370.625	2.21	2.16	2.17	2.23	2.23	2.22
1928	372.431	2.2	2.16	2.17	2.23	2.23	2.22
1938	374.236	2.2	2.15	2.17	2.23	2.23	2.22
1948	376.042	2.2	2.15	2.17	2.23	2.23	2.21
1958	378.028	2.2	2.15	2.16	2.22	2.22	2.21
1968	379.833	2.2	2.15	2.16	2.22	2.22	2.21
1978	381.639	2.19	2.14	2.16	2.22	2.22	2.21
1988	383.444	2.19	2.14	2.15	2.22	2.22	2.21
1999	385.25	2.19	2.14	2.15	2.22	2.22	2.2
2009	387.056	2.18	2.13	2.15	2.22	2.22	2.2
2019	389.042	2.18	2.13	2.14	2.22	2.21	2.2
2029	390.847	2.18	2.13	2.14	2.21	2.21	2.2
2039	392.653	2.18	2.12	2.14	2.21	2.21	2.19
2049	394.458	2.17	2.12	2.13	2.21	2.21	2.19
2059	396.264	2.17	2.12	2.13	2.21	2.21	2.19
2070	398.069	2.17	2.11	2.13	2.2	2.2	2.18
2080	399.875	2.16	2.11	2.12	2.2	2.2	2.18
2090	401.861	2.16	2.11	2.12	2.2	2.2	2.18
2100	403.667	2.16	2.1	2.11	2.19	2.19	2.17
2110	405.472	2.15	2.1	2.11	2.19	2.19	2.17
2120	407.278	2.15	2.1	2.11	2.19	2.19	2.16
2130	409.083	2.14	2.09	2.1	2.18	2.18	2.16
2141	410.889	2.14	2.09	2.1	2.18	2.18	2.15
2151	412.694	2.14	2.09	2.09	2.17	2.18	2.15
2161	414.681	2.13	2.08	2.09	2.17	2.17	2.14
2171	416.486	2.13	2.08	2.09	2.16	2.17	2.13
2181	418.292	2.13	2.07	2.08	2.16	2.16	2.13
2191	420.097	2.12	2.07	2.08	2.15	2.16	2.12
2201	421.903	2.12	2.07	2.07	2.15	2.15	2.11
2212	423.708	2.11	2.06	2.07	2.14	2.14	2.11
2222	425.514	2.11	2.06	2.06	2.13	2.14	2.1
2232	427.5	2.1	2.05	2.06	2.13	2.13	2.09
2242	429.306	2.1	2.05	2.05	2.12	2.12	2.08
2252	431.111	2.09	2.04	2.05	2.11	2.12	2.07
2262	432.917	2.09	2.04	2.04	2.1	2.11	2.06
2272	434.722	2.08	2.03	2.03	2.09	2.1	2.05
2283	436.528	2.08	2.03	2.03	2.08	2.09	2.04
2293	438.333	2.07	2.02	2.02	2.07	2.08	2.03
2303	440.319	2.07	2.02	2.01	2.06	2.07	2.02
2313	442.125	2.06	2.01	2.01	2.05	2.06	2
2323	443.931	2.05	2.01	2	2.04	2.05	1.99
2333	445.736	2.05	2	1.99	2.03	2.03	1.97
2343	447.542	2.04	2	1.99	2.01	2.02	1.96
2354	449.347	2.04	1.99	1.98	2	2.01	1.94
2364	451.153	2.03	1.98	1.97	1.98	1.99	1.93
2374	453.139	2.02	1.98	1.97	1.97	1.98	1.91
2384	454.944	2.02	1.97	1.96	1.95	1.96	1.89
2394	456.75	2.01	1.96	1.95	1.93	1.95	1.87
2404	458.556	2	1.96	1.94	1.92	1.93	1.85
2414	460.361	1.99	1.95	1.94	1.9	1.91	1.84
2425	462.167	1.99	1.94	1.93	1.88	1.89	1.81
2435	463.972	1.98	1.94	1.92	1.86	1.88	1.79
2445	465.958	1.97	1.93	1.91	1.84	1.86	1.77
2455	467.764	1.96	1.92	1.91	1.82	1.84	1.75
2465	469.569	1.96	1.92	1.9	1.79	1.82	1.73
2475	471.375	1.95	1.91	1.89	1.77	1.79	1.7
2485	473.181	1.94	1.9	1.88	1.75	1.77	1.68
2496	474.986	1.93	1.89	1.88	1.72	1.75	1.66
2506	476.792	1.92	1.89	1.87	1.7	1.73	1.63
2516	478.778	1.92	1.88	1.86	1.68	1.7	1.61
2526	480.583	1.91	1.87	1.85	1.65	1.68	1.59
2536	482.389	1.9	1.86	1.85	1.63	1.65	1.57
2546	484.194	1.89	1.85	1.84	1.6	1.63	1.54
2556	486	1.88	1.84	1.83	1.58	1.61	1.52
2567	487.806	1.88	1.84	1.83	1.55	1.58	1.5
2577	489.611	1.87	1.83	1.82	1.53	1.56	1.48
2587	491.597	1.86	1.82	1.81	1.51	1.54	1.46
2597	493.403	1.85	1.81	1.81	1.48	1.52	1.44
2607	495.208	1.85	1.8	1.8	1.46	1.5	1.42
2617	497.014	1.84	1.79	1.79	1.44	1.48	1.4
2627	498.819	1.83	1.79	1.78	1.42	1.46	1.39
2638	500.625	1.82	1.78	1.78	1.4	1.44	1.37
2648	502.431	1.82	1.77	1.77	1.38	1.42	1.36
2658	504.417	1.81	1.76	1.76	1.37	1.4	1.34
2668	506.222	1.8	1.75	1.76	1.35	1.39	1.33
2678	508.028	1.79	1.74	1.75	1.33	1.37	1.32
2688	509.833	1.79	1.74	1.74	1.32	1.36	1.3
2698	511.639	1.78	1.73	1.74	1.31	1.35	1.29
2709	513.444	1.77	1.72	1.73	1.29	1.33	1.28
2719	515.25	1.76	1.71	1.72	1.28	1.32	1.27
2729	517.236	1.76	1.7	1.72	1.27	1.31	1.26
2739	519.042	1.75	1.69	1.71	1.26	1.3	1.25
2749	520.847	1.74	1.69	1.7	1.25	1.29	1.24
2759	522.653	1.74	1.68	1.7	1.24	1.28	1.24
2769	524.458	1.73	1.67	1.69	1.23	1.27	1.23
2780	526.264	1.72	1.66	1.68	1.22	1.26	1.22
2790	528.069	1.71	1.65	1.68	1.21	1.26	1.22
2800	530.056	1.71	1.65	1.67	1.2	1.25	1.21
2810	531.861	1.7	1.64	1.66	1.2	1.24	1.2
2820	533.667	1.69	1.63	1.66	1.19	1.24	1.2
2830	535.472	1.68	1.62	1.65	1.18	1.23	1.19
2840	537.278	1.68	1.62	1.64	1.18	1.23	1.19
2851	539.083	1.67	1.61	1.64	1.17	1.22	1.18
2861	540.889	1.66	1.6	1.63	1.17	1.22	1.18
2871	542.875	1.66	1.59	1.63	1.16	1.21	1.17
2881	544.681	1.65	1.59	1.62	1.16	1.21	1.17
2891	546.486	1.64	1.58	1.61	1.15	1.2	1.17
2901	548.292	1.63	1.57	1.61	1.15	1.2	1.16
2912	550.097	1.63	1.56	1.6	1.15	1.19	1.16
2922	551.903	1.62	1.56	1.59	1.14	1.19	1.15
2932	553.708	1.61	1.55	1.59	1.14	1.19	1.15
2942	555.694	1.61	1.54	1.58	1.13	1.18	1.15
2952	557.5	1.6	1.54	1.58	1.13	1.18	1.14
2962	559.306	1.59	1.53	1.57	1.13	1.18	1.14
2973	561.111	1.59	1.52	1.57	1.12	1.17	1.14
2983	562.917	1.58	1.52	1.56	1.12	1.17	1.13
2993	564.722	1.57	1.51	1.55	1.12	1.17	1.13
3003	566.528	1.57	1.5	1.55	1.11	1.17	1.13
3013	568.514	1.56	1.5	1.54	1.11	1.16	1.12
3023	570.319	1.55	1.49	1.54	1.11	1.16	1.12
3033	572.125	1.55	1.48	1.53	1.1	1.16	1.12
3043	573.931	1.54	1.48	1.53	1.1	1.15	1.11
3054	575.736	1.54	1.47	1.52	1.1	1.15	1.11
3064	577.542	1.53	1.46	1.52	1.09	1.15	1.11
3074	579.347	1.52	1.46	1.51	1.09	1.14	1.1
3084	581.333	1.52	1.45	1.51	1.09	1.14	1.1
3094	583.139	1.51	1.44	1.5	1.08	1.14	1.1
3104	584.944	1.51	1.44	1.5	1.08	1.13	1.09
3114	586.75	1.5	1.43	1.49	1.08	1.13	1.09
3125	588.556	1.5	1.43	1.49	1.07	1.13	1.09
3135	590.361	1.49	1.42	1.49	1.07	1.12	1.08
3145	592.347	1.49	1.42	1.48	1.06	1.12	1.08
3155	594.153	1.48	1.41	1.48	1.06	1.11	1.08
3165	595.958	1.48	1.41	1.47	1.06	1.11	1.07
3175	597.764	1.47	1.4	1.47	1.06	1.11	1.07
3185	599.569	1.47	1.4	1.46	1.05	1.1	1.06
3196	601.375	1.46	1.39	1.46	1.05	1.1	1.06
3206	603.181	1.46	1.39	1.46	1.04	1.1	1.06
3216	605.167	1.45	1.38	1.45	1.04	1.1	1.05
3226	606.972	1.45	1.38	1.45	1.04	1.09	1.05
3236	608.778	1.44	1.37	1.44	1.03	1.09	1.05
3246	610.583	1.44	1.36	1.44	1.03	1.08	1.04
3256	612.389	1.43	1.36	1.44	1.03	1.08	1.04
3267	614.194	1.43	1.36	1.43	1.02	1.08	1.04
3277	616	1.42	1.35	1.43	1.02	1.08	1.03
3287	617.986	1.42	1.35	1.42	1.02	1.07	1.03
3297	619.792	1.41	1.34	1.42	1.01	1.07	1.03
3307	621.597	1.41	1.34	1.41	1.01	1.07	1.02
3317	623.403	1.4	1.33	1.41	1.01	1.06	1.02
3328	625.208	1.4	1.33	1.41	1	1.06	1.02
3338	627.014	1.4	1.32	1.4	1	1.06	1.01
3348	628.819	1.39	1.32	1.4	1	1.05	1.01
3358	630.806	1.39	1.31	1.39	0.99	1.05	1.01
3368	632.611	1.38	1.31	1.39	0.99	1.05	1.01
3378	634.417	1.38	1.3	1.39	0.99	1.04	1
3389	636.222	1.37	1.3	1.38	0.99	1.04	1
3399	638.028	1.37	1.29	1.38	0.98	1.04	1
3409	639.833	1.36	1.29	1.38	0.98	1.04	0.99
3419	641.639	1.36	1.29	1.37	0.98	1.03	0.99
3429	643.625	1.36	1.28	1.37	0.97	1.03	0.99
3439	645.431	1.35	1.28	1.37	0.97	1.03	0.99
3449	647.236	1.35	1.27	1.36	0.97	1.02	0.98
3460	649.042	1.34	1.27	1.36	0.96	1.02	0.98
3470	650.847	1.34	1.26	1.36	0.96	1.02	0.98
3480	652.653	1.34	1.26	1.35	0.96	1.02	0.98
3490	654.458	1.33	1.26	1.35	0.96	1.01	0.97
3500	656.444	1.33	1.25	1.35	0.95	1.01	0.97
3510	658.25	1.32	1.25	1.34	0.95	1.01	0.97
3521	660.056	1.32	1.24	1.34	0.95	1	0.96
3531	661.861	1.32	1.24	1.34	0.94	1	0.96
3541	663.667	1.31	1.24	1.33	0.94	1	0.96
3551	665.472	1.31	1.23	1.33	0.94	1	0.96
3561	667.278	1.31	1.23	1.33	0.94	0.99	0.95
3571	669.264	1.3	1.22	1.32	0.93	0.99	0.95
3581	671.069	1.3	1.22	1.32	0.93	0.99	0.95
3592	672.875	1.29	1.22	1.32	0.93	0.99	0.95
3602	674.681	1.29	1.21	1.31	0.93	0.99	0.95
3612	676.486	1.29	1.21	1.31	0.92	0.98	0.94
3622	678.292	1.28	1.21	1.31	0.92	0.98	0.94
3632	680.097	1.28	1.2	1.31	0.92	0.98	0.94
3642	682.083	1.28	1.2	1.3	0.92	0.98	0.94
3652	683.889	1.27	1.2	1.3	0.92	0.97	0.93
3663	685.694	1.27	1.19	1.3	0.91	0.97	0.93
3673	687.5	1.27	1.19	1.3	0.91	0.97	0.93
3683	689.306	1.27	1.19	1.29	0.91	0.97	0.93
3693	691.111	1.26	1.18	1.29	0.91	0.97	0.93
3703	692.917	1.26	1.18	1.29	0.91	0.96	0.92
3713	694.903	1.26	1.18	1.29	0.9	0.96	0.92
3723	696.708	1.25	1.18	1.28	0.9	0.96	0.92
3734	698.514	1.25	1.17	1.28	0.9	0.96	0.92
3744	700.319	1.25	1.17	1.28	0.9	0.96	0.92
3754	702.125	1.25	1.17	1.28	0.9	0.95	0.92
3764	703.931	1.24	1.17	1.27	0.89	0.95	0.91
3774	705.736	1.24	1.16	1.27	0.89	0.95	0.91
3784	707.722	1.24	1.16	1.27	0.89	0.95	0.91
3794	709.528	1.24	1.16	1.27	0.89	0.95	0.91
3805	711.333	1.24	1.16	1.27	0.89	0.95	0.91
3815	713.139	1.23	1.15	1.27	0.89	0.94	0.91
3825	714.944	1.23	1.15	1.26	0.88	0.94	0.9
3835	716.75	1.23	1.15	1.26	0.88	0.94	0.9
3845	718.556	1.23	1.15	1.26	0.88	0.94	0.9
3855	720.542	1.23	1.15	1.26	0.88	0.94	0.9
3865	722.347	1.22	1.14	1.26	0.88	0.94	0.9
3876	724.153	1.22	1.14	1.25	0.88	0.93	0.9
3886	725.958	1.22	1.14	1.25	0.88	0.93	0.9
3896	727.764	1.22	1.14	1.25	0.87	0.93	0.89
3906	729.569	1.22	1.14	1.25	0.87	0.93	0.89
3916	731.375	1.21	1.14	1.25	0.87	0.93	0.89
3926	733.361	1.21	1.13	1.25	0.87	0.93	0.89
3936	735.167	1.21	1.13	1.25	0.87	0.93	0.89
3947	736.972	1.21	1.13	1.25	0.87	0.92	0.89
3957	738.778	1.21	1.13	1.24	0.87	0.92	0.89
3967	740.583	1.21	1.13	1.24	0.86	0.92	0.89
3977	742.389	1.2	1.12	1.24	0.86	0.92	0.88
3987	744.194	1.2	1.12	1.24	0.86	0.92	0.88
3997	746.181	1.2	1.12	1.24	0.86	0.92	0.88
4007	747.986	1.2	1.12	1.24	0.86	0.92	0.88
4018	749.792	1.2	1.12	1.24	0.86	0.92	0.88
4028	751.597	1.2	1.12	1.24	0.86	0.91	0.88
4038	753.403	1.2	1.12	1.24	0.86	0.91	0.88
4048	755.208	1.2	1.12	1.23	0.85	0.91	0.88
4058	757.014	1.2	1.12	1.23	0.85	0.91	0.87
4068	759	1.19	1.11	1.23	0.85	0.91	0.87
4078	760.806	1.19	1.11	1.23	0.85	0.91	0.87
4089	762.611	1.19	1.11	1.23	0.85	0.91	0.87
4099	764.417	1.19	1.11	1.23	0.85	0.91	0.87
4109	766.222	1.19	1.11	1.23	0.85	0.91	0.87
4119	768.028	1.19	1.11	1.23	0.85	0.9	0.87
4129	769.833	1.19	1.11	1.23	0.85	0.9	0.87
4139	771.819	1.19	1.11	1.23	0.85	0.9	0.87
4149	773.625	1.19	1.1	1.22	0.84	0.9	0.86
4160	775.431	1.18	1.1	1.22	0.84	0.9	0.86
4170	777.236	1.18	1.1	1.22	0.84	0.9	0.86
4180	779.042	1.18	1.1	1.22	0.84	0.9	0.86
4190	780.847	1.18	1.1	1.22	0.84	0.9	0.86
4200	782.653	1.18	1.1	1.22	0.84	0.9	0.86
4210	784.639	1.18	1.1	1.22	0.84	0.9	0.86
4221	786.444	1.18	1.1	1.22	0.84	0.89	0.86
4231	788.25	1.18	1.1	1.22	0.84	0.89	0.86
4241	790.056	1.18	1.09	1.22	0.84	0.89	0.86
4251	791.861	1.18	1.09	1.22	0.83	0.89	0.86
4261	793.667	1.18	1.09	1.21	0.83	0.89	0.85
4271	795.472	1.18	1.09	1.21	0.83	0.89	0.85
4281	797.458	1.17	1.09	1.21	0.83	0.89	0.85
4292	799.264	1.17	1.09	1.21	0.83	0.89	0.85
4302	801.069	1.17	1.09	1.21	0.83	0.89	0.85
4312	802.875	1.17	1.09	1.21	0.83	0.89	0.85
4322	804.681	1.17	1.09	1.21	0.83	0.88	0.85
4332	806.486	1.17	1.09	1.21	0.83	0.88	0.85
4342	808.292	1.17	1.08	1.21	0.83	0.88	0.85
4352	810.278	1.17	1.08	1.21	0.83	0.88	0.85
4363	812.083	1.17	1.08	1.21	0.83	0.88	0.85
4373	813.889	1.17	1.08	1.21	0.82	0.88	0.84
4383	815.694	1.17	1.08	1.21	0.82	0.88	0.84
4393	817.5	1.17	1.08	1.2	0.82	0.88	0.84
4403	819.306	1.17	1.08	1.2	0.82	0.88	0.84
4413	821.111	1.16	1.08	1.2	0.82	0.88	0.84
4423	823.097	1.16	1.08	1.2	0.82	0.87	0.84
4434	824.903	1.16	1.08	1.2	0.82	0.87	0.84
4444	826.708	1.16	1.07	1.2	0.82	0.87	0.84
4454	828.514	1.16	1.07	1.2	0.82	0.87	0.84
4464	830.319	1.16	1.07	1.2	0.82	0.87	0.84
4474	832.125	1.16	1.07	1.2	0.82	0.87	0.84
4484	834.111	1.16	1.07	1.2	0.81	0.87	0.84
4494	835.917	1.16	1.07	1.2	0.81	0.87	0.83
4505	837.722	1.16	1.07	1.2	0.81	0.87	0.83
4515	839.528	1.16	1.07	1.2	0.81	0.87	0.83
4525	841.333	1.16	1.07	1.2	0.81	0.87	0.83
4535	843.139	1.16	1.07	1.19	0.81	0.86	0.83
4545	844.944	1.15	1.07	1.19	0.81	0.86	0.83
4555	846.744	1.15	1.06	1.19	0.81	0.86	0.83
4565	848.544	1.15	1.06	1.19	0.81	0.86	0.83
4576	850.344	1.15	1.06	1.19	0.81	0.86	0.83

## Sheet: DSC
The table below presents results from differential scanning calorimetry (DSC) analysis. Data about each material is summarized into three tables. The first table has the substrate name, second – the conditions of measurements, third – the data used to baseline calculation, and fourth – main results of analysis (heat flux of the sample, and enthalpy of particular peaks).
Sewage sludge									Digestate
Sample mass		5.42	mg						Sample mass		6.24	mg
Range		20-550	°C						Range		20-550	°C
Heating		10	°C/min						Heating		10	°C/min
Data for the main baseline:	x1	20.01							Data for the main baseline:	x1	20.01
	y1	-0.148								y1	-0.211
	x2	548.7								x2	548.65
	y2	-0.213								y2	-0.057
	y0 (b)	-0.14554								y0 (b)	-0.216829
	a	-0.000122945								a	0.000291314
Temperature, °C	Heat flux for the sample, mW	Time, s	Enthalpy of the sample (without normalization), J/ g	Heat flux of main baseline, mW	Enthalpy of the sample (normalized), J/g	Heat fluxes of baselines for peak 1 , mW	Enthalpy of the peak 1, J/g		Temperature, °C	Heat flux for the sample, mW	Time, s	Enthalpy of the sample (without normalization), J/ g	Heat flux of main baseline, mW	Enthalpy of the sample (normalized), J/g	Heat fluxes of baselines for peak 1 and 2, mW	Enthalpy of the peak 1, J/g	Enthalpy of the peak 2, J/g
20	-0.147999	60		-0.147999					20	-0.211003	60		-0.211003
21	-0.842	73.8	-2.14384	-0.148122	-1.7667				21	-1.009	73.8	-2.23144	-0.210712	-1.76545
22	-1.083	80.5	-1.33876	-0.148245	-1.15551				22	-1.278	80.5	-1.37221	-0.21042	-1.14628
23	-1.18	86.7	-1.34982	-0.148368	-1.1801				23	-1.373	86.7	-1.3642	-0.210129	-1.15542
24	-1.217	92.8	-1.36969	-0.148491	-1.20257				24	-1.417	92.8	-1.38521	-0.209838	-1.18008
25	-1.238	98.8	-1.37048	-0.148613	-1.20596				25	-1.444	98.8	-1.38846	-0.209546	-1.18697
26	-1.251	104.8	-1.38487	-0.148736	-1.22022				26	-1.463	104.9	-1.43018	-0.209255	-1.22562
27	-1.264	110.8	-1.39926	-0.148859	-1.23447				27	-1.482	110.9	-1.425	-0.208964	-1.22407
28	-1.28	116.9	-1.44059	-0.148982	-1.27292				28	-1.501	116.9	-1.44327	-0.208672	-1.24262
29	-1.295	122.9	-1.43358	-0.149105	-1.26852				29	-1.52	122.9	-1.46154	-0.208381	-1.26117
30	-1.311	128.9	-1.45129	-0.149228	-1.28609				30	-1.541	129	-1.50643	-0.20809	-1.30301
31	-1.33	134.9	-1.47232	-0.149351	-1.30699				31	-1.569	135	-1.50865	-0.207798	-1.30885
32	-1.346	140.9	-1.49004	-0.149474	-1.32457				32	-1.596	141	-1.53462	-0.207507	-1.33509
33	-1.365	146.9	-1.51107	-0.149597	-1.34546				33	-1.619	147	-1.55673	-0.207216	-1.35748
34	-1.383	152.9	-1.531	-0.14972	-1.36525				34	-1.647	153	-1.58365	-0.206925	-1.38469
35	-1.403	158.9	-1.55314	-0.149843	-1.38726				35	-1.676	159	-1.61154	-0.206633	-1.41285
36	-1.421	164.9	-1.57306	-0.149966	-1.40705				36	-1.705	165	-1.63942	-0.206342	-1.44102	-1.728	0.0221154
37	-1.445	170.9	-1.59963	-0.150089	-1.43348				37	-1.74	171	-1.67308	-0.206051	-1.47495	-1.728	-0.0115385
38	-1.466	177	-1.64993	-0.150212	-1.48087				38	-1.769	177	-1.70096	-0.205759	-1.50312	-1.728	-0.0394231
39	-1.492	183	-1.65166	-0.150335	-1.48524				39	-1.801	183	-1.73173	-0.205468	-1.53417	-1.728	-0.0701923
40	-1.515	189	-1.67712	-0.150458	-1.51056				40	-1.832	189.1	-1.7909	-0.205177	-1.59032	-1.728	-0.101667
41	-1.537	195	-1.70148	-0.150581	-1.53478				41	-1.869	195.1	-1.79712	-0.204885	-1.60011	-1.728	-0.135577
42	-1.558	201	-1.72472	-0.150704	-1.55789				42	-1.908	201.1	-1.83462	-0.204594	-1.63789	-1.728	-0.173077
43	-1.59	207	-1.76015	-0.150827	-1.59318				43	-1.948	207.1	-1.87308	-0.204303	-1.67663	-1.728	-0.211538
44	-1.616	213	-1.78893	-0.150949	-1.62183				44	-1.987	213.1	-1.91058	-0.204011	-1.71441	-1.728	-0.249038
45	-1.642	219	-1.81771	-0.151072	-1.65047				45	-2.025	219.1	-1.94712	-0.20372	-1.75123	-1.728	-0.285577
46	-1.671	225	-1.84982	-0.151195	-1.68244				46	-2.063	225.1	-1.98365	-0.203429	-1.78805	-1.728	-0.322115
47	-1.699	231	-1.88081	-0.151318	-1.7133				47	-2.106	231.1	-2.025	-0.203137	-1.82968	-1.728	-0.363462
48	-1.732	237	-1.91734	-0.151441	-1.7497				48	-2.152	237.1	-2.06923	-0.202846	-1.87419	-1.728	-0.407692
49	-1.763	243	-1.95166	-0.151564	-1.78388				49	-2.198	243.2	-2.14869	-0.202555	-1.95068	-1.728	-0.459455
50	-1.796	249	-1.98819	-0.151687	-1.82027				50	-2.248	249.2	-2.16154	-0.202264	-1.96705	-1.728	-0.5
51	-1.827	255	-2.02251	-0.15181	-1.85445				51	-2.294	255.2	-2.20577	-0.201972	-2.01157	-1.728	-0.544231
52	-1.859	261	-2.05793	-0.151933	-1.88974				52	-2.344	261.2	-2.25385	-0.201681	-2.05992	-1.728	-0.592308
53	-1.894	267.1	-2.13162	-0.152056	-1.96049				53	-2.396	267.2	-2.30385	-0.20139	-2.1102	-1.728	-0.642308
54	-1.931	273.1	-2.13764	-0.152179	-1.96917				54	-2.443	273.2	-2.34904	-0.201098	-2.15567	-1.728	-0.6875
55	-1.964	279.1	-2.17417	-0.152302	-2.00557				55	-2.497	279.2	-2.40096	-0.200807	-2.20788	-1.728	-0.739423
56	-2	285.1	-2.21402	-0.152425	-2.04529				56	-2.555	285.3	-2.49768	-0.200516	-2.30166	-1.728	-0.808446
57	-2.04	291.1	-2.2583	-0.152548	-2.08943				57	-2.605	291.3	-2.50481	-0.200224	-2.31228	-1.728	-0.843269
58	-2.071	297.1	-2.29262	-0.152671	-2.12361				58	-2.66	297.3	-2.55769	-0.199933	-2.36545	-1.728	-0.896154
59	-2.109	303.1	-2.33469	-0.152794	-2.16554				59	-2.716	303.3	-2.61154	-0.199642	-2.41958	-1.728	-0.95
60	-2.148	309.1	-2.37786	-0.152917	-2.20858				60	-2.774	309.3	-2.66731	-0.19935	-2.47562	-1.728	-1.00577
61	-2.184	315.1	-2.41771	-0.15304	-2.2483				61	-2.829	315.3	-2.72019	-0.199059	-2.52879	-1.728	-1.05865
62	-2.217	321.1	-2.45424	-0.153162	-2.28469				62	-2.884	321.4	-2.81929	-0.198768	-2.62499	-1.728	-1.13006
63	-2.254	327.1	-2.4952	-0.153285	-2.32551				63	-2.937	327.4	-2.82404	-0.198476	-2.6332	-1.728	-1.1625
64	-2.289	333.1	-2.53395	-0.153408	-2.36412				64	-2.997	333.4	-2.88173	-0.198185	-2.69117	-1.728	-1.22019
65	-2.322	339.2	-2.61332	-0.153531	-2.44053				65	-3.051	339.4	-2.93365	-0.197894	-2.74337	-1.728	-1.27212
66	-2.356	345.2	-2.60812	-0.153654	-2.43802				66	-3.106	345.4	-2.98654	-0.197602	-2.79654	-1.728	-1.325
67	-2.389	351.2	-2.64465	-0.153777	-2.47442				67	-3.156	351.4	-3.03462	-0.197311	-2.84489	-1.728	-1.37308
68	-2.42	357.2	-2.67897	-0.1539	-2.5086				68	-3.206	357.5	-3.13407	-0.19702	-2.94147	-1.728	-1.44484
69	-2.455	363.2	-2.71771	-0.154023	-2.54721				69	-3.257	363.5	-3.13173	-0.196729	-2.94257	-1.728	-1.47019
70	-2.485	369.2	-2.75092	-0.154146	-2.58028				70	-3.308	369.5	-3.18077	-0.196437	-2.99189	-1.728	-1.51923
71	-2.521	375.2	-2.79077	-0.154269	-2.62				71	-3.348	375.5	-3.21923	-0.196146	-3.03063	-1.728	-1.55769
72	-2.549	381.2	-2.82177	-0.154392	-2.65086	-2.554	0.00553506		72	-3.393	381.5	-3.2625	-0.195855	-3.07418	-1.728	-1.60096
73	-2.578	387.2	-2.85387	-0.154515	-2.68282	-2.554	-0.0265683		73	-3.432	387.5	-3.3	-0.195563	-3.11196	-1.728	-1.63846
74	-2.602	393.2	-2.88044	-0.154638	-2.70926	-2.554	-0.0531365		74	-3.471	393.5	-3.3375	-0.195272	-3.14974	-1.728	-1.67596
75	-2.63	399.2	-2.91144	-0.154761	-2.74012	-2.554	-0.0841328		75	-3.507	399.5	-3.37212	-0.194981	-3.18463	-1.728	-1.71058
76	-2.656	405.2	-2.94022	-0.154884	-2.76876	-2.554	-0.112915		76	-3.54	405.6	-3.46058	-0.194689	-3.27026	-1.728	-1.77135
77	-2.682	411.2	-2.969	-0.155007	-2.79741	-2.554	-0.141697		77	-3.571	411.6	-3.43365	-0.194398	-3.24673	-1.728	-1.77212
78	-2.7	417.2	-2.98893	-0.15513	-2.8172	-2.554	-0.161624		78	-3.596	417.6	-3.45769	-0.194107	-3.27105	-1.728	-1.79615
79	-2.72	423.2	-3.01107	-0.155253	-2.8392	-2.554	-0.183764		79	-3.619	423.6	-3.47981	-0.193815	-3.29345	-1.728	-1.81827
80	-2.738	429.2	-3.031	-0.155375	-2.85899	-2.554	-0.20369		80	-3.64	429.6	-3.5	-0.193524	-3.31392	-1.728	-1.83846
81	-2.754	435.2	-3.04871	-0.155498	-2.87657	-2.554	-0.221402		81	-3.658	435.6	-3.51731	-0.193233	-3.33151	-1.728	-1.85577
82	-2.772	441.2	-3.06863	-0.155621	-2.89636	-2.554	-0.241328		82	-3.674	441.6	-3.53269	-0.192941	-3.34717	-1.728	-1.87115
83	-2.79	447.2	-3.08856	-0.155744	-2.91615	-2.554	-0.261255		83	-3.687	447.6	-3.54519	-0.19265	-3.35995	-1.728	-1.88365
84	-2.804	453.2	-3.10406	-0.155867	-2.93151	-2.554	-0.276753		84	-3.697	453.6	-3.55481	-0.192359	-3.36985	-1.728	-1.89327
85	-2.818	459.2	-3.11956	-0.15599	-2.94687	-2.554	-0.292251		85	-3.705	459.6	-3.5625	-0.192068	-3.37782	-1.728	-1.90096
86	-2.829	465.2	-3.13173	-0.156113	-2.95892	-2.554	-0.304428		86	-3.711	465.5	-3.5088	-0.191776	-3.32747	-1.728	-1.87495
87	-2.841	471.2	-3.14502	-0.156236	-2.97206	-2.554	-0.317712		87	-3.715	471.5	-3.57212	-0.191485	-3.388	-1.728	-1.91058
88	-2.856	477.2	-3.16162	-0.156359	-2.98853	-2.554	-0.334317		88	-3.715	477.5	-3.57212	-0.191194	-3.38828	-1.728	-1.91058
89	-2.865	483.2	-3.17159	-0.156482	-2.99836	-2.554	-0.34428		89	-3.712	483.5	-3.56923	-0.190902	-3.38567	-1.728	-1.90769
90	-2.873	489.2	-3.18044	-0.156605	-3.00708	-2.554	-0.353137		90	-3.706	489.5	-3.56346	-0.190611	-3.38018	-1.728	-1.90192
91	-2.881	495.2	-3.1893	-0.156728	-3.0158	-2.554	-0.361993		91	-3.695	495.5	-3.55288	-0.19032	-3.36988	-1.728	-1.89135
92	-2.887	501.2	-3.19594	-0.156851	-3.02231	-2.554	-0.368635		92	-3.682	501.5	-3.54038	-0.190028	-3.35767	-1.728	-1.87885
93	-2.893	507.2	-3.20258	-0.156974	-3.02881	-2.554	-0.375277		93	-3.665	507.5	-3.52404	-0.189737	-3.3416	-1.728	-1.8625
94	-2.898	513.2	-3.20812	-0.157097	-3.03421	-2.554	-0.380812		94	-3.646	513.5	-3.50577	-0.189446	-3.32361	-1.728	-1.84423
95	-2.902	519.2	-3.21255	-0.15722	-3.0385	-2.554	-0.38524		95	-3.628	519.4	-3.43032	-0.189154	-3.25147	-1.728	-1.79647
96	-2.907	525.2	-3.21808	-0.157343	-3.0439	-2.554	-0.390775		96	-3.606	525.4	-3.46731	-0.188863	-3.28571	-1.728	-1.80577
97	-2.91	531.2	-3.2214	-0.157466	-3.04709	-2.554	-0.394096		97	-3.575	531.4	-3.4375	-0.188572	-3.25618	-1.728	-1.77596
98	-2.914	537.2	-3.22583	-0.157589	-3.05138	-2.554	-0.398524		98	-3.548	537.4	-3.41154	-0.18828	-3.2305	-1.728	-1.75
99	-2.918	543.2	-3.23026	-0.157711	-3.05567	-2.554	-0.402952		99	-3.52	543.4	-3.38462	-0.187989	-3.20386	-1.728	-1.72308
100	-2.921	549.2	-3.23358	-0.157834	-3.05885	-2.554	-0.406273		100	-3.491	549.4	-3.35673	-0.187698	-3.17625	-1.728	-1.69519
101	-2.923	555.2	-3.23579	-0.157957	-3.06093	-2.554	-0.408487		101	-3.46	555.3	-3.27147	-0.187407	-3.09428	-1.728	-1.63763
102	-2.925	561.1	-3.18404	-0.15808	-3.01196	-2.554	-0.403856		102	-3.421	561.3	-3.28942	-0.187115	-3.1095	-1.728	-1.62788
103	-2.925	567.1	-3.23801	-0.158203	-3.06287	-2.554	-0.410701		103	-3.377	567.3	-3.24712	-0.186824	-3.06748	-1.728	-1.58558
104	-2.925	573.1	-3.23801	-0.158326	-3.06274	-2.554	-0.410701		104	-3.336	573.3	-3.20769	-0.186533	-3.02833	-1.728	-1.54615
105	-2.922	579.1	-3.23469	-0.158449	-3.05928	-2.554	-0.40738		105	-3.29	579.3	-3.16346	-0.186241	-2.98438	-1.728	-1.50192
106	-2.918	585.1	-3.23026	-0.158572	-3.05472	-2.554	-0.402952		106	-3.245	585.2	-3.06819	-0.18595	-2.89237	-1.728	-1.43434
107	-2.912	591.1	-3.22362	-0.158695	-3.04794	-2.554	-0.39631		107	-3.2	591.2	-3.07692	-0.185659	-2.89841	-1.728	-1.41538
108	-2.904	597.1	-3.21476	-0.158818	-3.03895	-2.554	-0.387454		108	-3.154	597.2	-3.03269	-0.185367	-2.85445	-1.728	-1.37115
109	-2.894	603.1	-3.20369	-0.158941	-3.02774	-2.554	-0.376384		109	-3.103	603.2	-2.98365	-0.185076	-2.8057	-1.728	-1.32212
110	-2.881	609.1	-3.1893	-0.159064	-3.01321	-2.554	-0.361993		110	-3.053	609.1	-2.88665	-0.184785	-2.71193	-1.728	-1.2528
111	-2.866	615.1	-3.17269	-0.159187	-2.99647	-2.554	-0.345387		111	-3.008	615.1	-2.89231	-0.184493	-2.71491	-1.728	-1.23077
112	-2.85	621.1	-3.15498	-0.15931	-2.97862	-2.554	-0.327675		112	-2.951	621.1	-2.8375	-0.184202	-2.66038	-1.728	-1.17596
113	-2.837	627	-3.08825	-0.159433	-2.9147	-2.554	-0.308063		113	-2.906	627.1	-2.79423	-0.183911	-2.61739	-1.728	-1.13269
114	-2.824	633	-3.1262	-0.159556	-2.94957	-2.554	-0.298893		114	-2.853	633	-2.69755	-0.183619	-2.52393	-1.728	-1.0637
115	-2.809	639	-3.10959	-0.159679	-2.93283	-2.554	-0.282288		115	-2.805	639	-2.69712	-0.183328	-2.52084	-1.728	-1.03558
116	-2.796	645	-3.0952	-0.159802	-2.9183	-2.554	-0.267897		116	-2.762	645	-2.65577	-0.183037	-2.47977	-1.728	-0.994231
117	-2.779	651	-3.07638	-0.159924	-2.89935	-2.554	-0.249077		117	-2.72	651	-2.61538	-0.182745	-2.43967	-1.728	-0.953846
118	-2.767	657	-3.0631	-0.160047	-2.88593	-2.554	-0.235793		118	-2.673	657	-2.57019	-0.182454	-2.39476	-1.728	-0.908654
119	-2.754	663	-3.04871	-0.16017	-2.8714	-2.554	-0.221402		119	-2.631	662.9	-2.48764	-0.182163	-2.31541	-1.728	-0.853798
120	-2.741	669	-3.03432	-0.160293	-2.85687	-2.554	-0.207011		120	-2.591	668.9	-2.49135	-0.181872	-2.31647	-1.728	-0.829808
121	-2.728	675	-3.01993	-0.160416	-2.84234	-2.554	-0.19262		121	-2.549	674.9	-2.45096	-0.18158	-2.27637	-1.728	-0.789423
122	-2.715	681	-3.00554	-0.160539	-2.82782	-2.554	-0.178229		122	-2.512	680.9	-2.41538	-0.181289	-2.24107	-1.728	-0.753846
123	-2.7	686.9	-2.93911	-0.160662	-2.76422	-2.554	-0.15893		123	-2.465	686.9	-2.37019	-0.180998	-2.19616	-1.728	-0.708654
124	-2.687	692.9	-2.97454	-0.160785	-2.79655	-2.554	-0.147232		124	-2.433	692.9	-2.33942	-0.180706	-2.16567	-1.728	-0.677885
125	-2.675	698.9	-2.96125	-0.160908	-2.78313	-2.554	-0.133948		125	-2.394	698.8	-2.26356	-0.180415	-2.09297	-1.728	-0.629712
126	-2.662	704.9	-2.94686	-0.161031	-2.7686	-2.554	-0.119557		126	-2.36	704.8	-2.26923	-0.180124	-2.09603	-1.728	-0.607692
127	-2.647	710.9	-2.93026	-0.161154	-2.75186	-2.554	-0.102952		127	-2.323	710.8	-2.23365	-0.179832	-2.06074	-1.728	-0.572115
128	-2.636	716.9	-2.91808	-0.161277	-2.73955	-2.554	-0.0907749		128	-2.293	716.8	-2.20481	-0.179541	-2.03217	-1.728	-0.543269
129	-2.624	722.9	-2.9048	-0.1614	-2.72613	-2.554	-0.0774908		129	-2.255	722.8	-2.16827	-0.17925	-1.99591	-1.728	-0.506731
130	-2.614	728.9	-2.89373	-0.161523	-2.71492	-2.554	-0.0664207		130	-2.23	728.7	-2.10849	-0.178958	-1.93929	-1.728	-0.474647
131	-2.604	734.9	-2.88266	-0.161646	-2.70371	-2.554	-0.0553506		131	-2.2	734.7	-2.11538	-0.178667	-1.94359	-1.728	-0.453846
132	-2.595	740.9	-2.87269	-0.161769	-2.69361	-2.554	-0.0453875		132	-2.173	740.7	-2.08942	-0.178376	-1.91791	-1.728	-0.427885
133	-2.587	746.9	-2.86384	-0.161892	-2.68462	-2.554	-0.0365314		133	-2.146	746.7	-2.06346	-0.178084	-1.89223	-1.728	-0.401923
134	-2.581	752.8	-2.80958	-0.162015	-2.63321	-2.554	-0.0293911		134	-2.121	752.7	-2.03942	-0.177793	-1.86847	-1.728	-0.377885
135	-2.577	758.9	-2.90031	-0.162137	-2.71783	-2.554	-0.0258856		135	-2.097	758.7	-2.01635	-0.177502	-1.84567	-1.728	-0.354808
136	-2.573	764.8	-2.80087	-0.16226	-2.62424	-2.554	-0.0206827		136	-2.074	764.7	-1.99423	-0.177211	-1.82384	-1.728	-0.332692
137	-2.569	770.8	-2.84391	-0.162383	-2.66415	-2.554	-0.0166052		137	-2.05	770.6	-1.9383	-0.176919	-1.77102	-1.728	-0.304455
138	-2.567	776.8	-2.8417	-0.162506	-2.6618	-2.554	-0.0143911		138	-2.03	776.6	-1.95192	-0.176628	-1.78209	-1.728	-0.290385
139	-2.564	782.8	-2.83838	-0.162629	-2.65834	-2.554	-0.0110701		139	-2.007	782.6	-1.92981	-0.176337	-1.76025	-1.728	-0.268269
140	-2.562	788.8	-2.83616	-0.162752	-2.65599	-2.554	-0.00885609		140	-1.991	788.6	-1.91442	-0.176045	-1.74515	-1.728	-0.252885
141	-2.56	794.8	-2.83395	-0.162875	-2.65364	-2.554	-0.00664207		141	-1.975	794.6	-1.89904	-0.175754	-1.73004	-1.728	-0.2375
142	-2.558	800.8	-2.83173	-0.162998	-2.65129	-2.554	-0.00442804		142	-1.96	800.6	-1.88462	-0.175463	-1.7159	-1.728	-0.223077
143	-2.557	806.8	-2.83063	-0.163121	-2.65005	-2.554	-0.00332103		143	-1.944	806.6	-1.86923	-0.175171	-1.7008	-1.728	-0.207692
144	-2.56	812.8	-2.83395	-0.163244	-2.65324	-2.554	-0.00664207		144	-1.929	812.6	-1.85481	-0.17488	-1.68665	-1.728	-0.193269
145	-2.566	818.8	-2.84059	-0.163367	-2.65974	-2.554	-0.0132841		145	-1.915	818.6	-1.84135	-0.174589	-1.67347	-1.728	-0.179808
146	-2.582	824.8	-2.8583	-0.16349	-2.67732	-2.554	-0.0309963		146	-1.9	824.5	-1.79647	-0.174297	-1.63167	-1.728	-0.162628
147	-2.616	830.8	-2.89594	-0.163613	-2.71482	-2.554	-0.0686347		147	-1.886	830.5	-1.81346	-0.174006	-1.64615	-1.728	-0.151923
148	-2.669	836.8	-2.95461	-0.163736	-2.77336	-2.554	-0.127306		148	-1.873	836.5	-1.80096	-0.173715	-1.63393	-1.728	-0.139423
149	-2.724	842.8	-3.0155	-0.163859	-2.8341	-2.554	-0.188192		149	-1.861	842.5	-1.78942	-0.173423	-1.62267	-1.728	-0.127885
150	-2.786	848.9	-3.13554	-0.163982	-2.95098	-2.554	-0.261107		150	-1.85	848.5	-1.77885	-0.173132	-1.61237	-1.728	-0.117308
151	-2.843	854.9	-3.14723	-0.164105	-2.96557	-2.554	-0.319926		151	-1.84	854.5	-1.76923	-0.172841	-1.60304	-1.728	-0.107692
152	-2.89	860.9	-3.19926	-0.164228	-3.01746	-2.554	-0.371956		152	-1.83	860.5	-1.75962	-0.17255	-1.5937	-1.728	-0.0980769
153	-2.921	866.9	-3.23358	-0.164351	-3.05164	-2.554	-0.406273		153	-1.82	866.5	-1.75	-0.172258	-1.58437	-1.728	-0.0884615
154	-2.94	872.9	-3.25461	-0.164473	-3.07254	-2.554	-0.427306		154	-1.811	872.5	-1.74135	-0.171967	-1.57599	-1.728	-0.0798077
155	-2.95	878.9	-3.26568	-0.164596	-3.08347	-2.554	-0.438376		155	-1.801	878.5	-1.73173	-0.171676	-1.56666	-1.728	-0.0701923
156	-2.95	884.9	-3.26568	-0.164719	-3.08334	-2.554	-0.438376		156	-1.792	884.5	-1.72308	-0.171384	-1.55828	-1.728	-0.0615385
157	-2.933	890.9	-3.24686	-0.164842	-3.06438	-2.554	-0.419557		157	-1.781	890.5	-1.7125	-0.171093	-1.54799	-1.728	-0.0509615
158	-2.895	896.9	-3.2048	-0.164965	-3.02218	-2.554	-0.377491		158	-1.773	896.5	-1.70481	-0.170802	-1.54058	-1.728	-0.0432692
159	-2.856	902.9	-3.16162	-0.165088	-2.97887	-2.554	-0.334317		159	-1.765	902.5	-1.69712	-0.17051	-1.53316	-1.728	-0.0355769
160	-2.813	908.8	-3.06212	-0.165211	-2.88228	-2.554	-0.281937		160	-1.758	908.5	-1.69038	-0.170219	-1.52671	-1.728	-0.0288462
161	-2.765	914.8	-3.06089	-0.165334	-2.87786	-2.554	-0.233579		161	-1.752	914.5	-1.68462	-0.169928	-1.52122	-1.728	-0.0230769
162	-2.726	920.8	-3.01771	-0.165457	-2.83455	-2.554	-0.190406		162	-1.747	920.5	-1.67981	-0.169636	-1.5167	-1.728	-0.0182692
163	-2.698	926.8	-2.98672	-0.16558	-2.80342	-2.554	-0.15941		163	-1.742	926.4	-1.64708	-0.169345	-1.48697	-1.728	-0.0132372
164	-2.671	932.8	-2.95683	-0.165703	-2.77339	-2.554	-0.12952		164	-1.738	932.4	-1.67115	-0.169054	-1.5086	-1.728	-0.00961538
165	-2.644	938.7	-2.87815	-0.165826	-2.69764	-2.554	-0.0979705		165	-1.735	938.4	-1.66827	-0.168762	-1.506	-1.728	-0.00673077
166	-2.625	944.7	-2.9059	-0.165949	-2.7222	-2.554	-0.0785978		166	-1.731	944.4	-1.66442	-0.168471	-1.50243	-1.728	-0.00288462
167	-2.606	950.7	-2.88487	-0.166072	-2.70103	-2.554	-0.0575646		167	-1.729	950.4	-1.6625	-0.16818	-1.50079	-1.728	-0.000961538
168	-2.585	956.7	-2.86162	-0.166195	-2.67764	-2.554	-0.0343173		168	-1.728	956.4	-1.66154	-0.167889	-1.50011	-1.728	0
169	-2.567	962.7	-2.8417	-0.166318	-2.65758	-2.554	-0.0143911		169	-1.727	962.4	-1.66058	-0.167597	-1.49943
170	-2.55	968.7	-2.82288	-0.166441	-2.63863	-2.554	0.00442804		170	-1.726	968.4	-1.65962	-0.167306	-1.49874
171	-2.533	974.7	-2.80406	-0.166564	-2.61967				171	-1.726	974.4	-1.65962	-0.167015	-1.49902
172	-2.519	980.7	-2.78856	-0.166686	-2.60404				172	-1.727	980.4	-1.66058	-0.166723	-1.50027
173	-2.505	986.7	-2.77306	-0.166809	-2.5884				173	-1.727	986.4	-1.66058	-0.166432	-1.50055
174	-2.493	992.6	-2.71378	-0.166932	-2.53207				174	-1.729	992.4	-1.6625	-0.166141	-1.50275
175	-2.481	998.6	-2.74649	-0.167055	-2.56156				175	-1.731	998.4	-1.66442	-0.165849	-1.50495
176	-2.469	1004.6	-2.73321	-0.167178	-2.54814				176	-1.732	1004.4	-1.66538	-0.165558	-1.50619
177	-2.46	1010.6	-2.72325	-0.167301	-2.53804				177	-1.734	1010.4	-1.66731	-0.165267	-1.5084
178	-2.451	1016.6	-2.71328	-0.167424	-2.52794				178	-1.736	1016.4	-1.66923	-0.164975	-1.5106
179	-2.441	1022.6	-2.70221	-0.167547	-2.51674				179	-1.739	1022.4	-1.67212	-0.164684	-1.51377
180	-2.433	1028.6	-2.69336	-0.16767	-2.50775				180	-1.741	1028.4	-1.67404	-0.164393	-1.51597
181	-2.426	1034.6	-2.68561	-0.167793	-2.49986				181	-1.743	1034.4	-1.67596	-0.164101	-1.51817
182	-2.419	1040.6	-2.67786	-0.167916	-2.49197				182	-1.745	1040.4	-1.67788	-0.16381	-1.52037
183	-2.413	1046.6	-2.67122	-0.168039	-2.4852				183	-1.748	1046.4	-1.68077	-0.163519	-1.52354
184	-2.405	1052.6	-2.66236	-0.168162	-2.4762				184	-1.749	1052.4	-1.68173	-0.163227	-1.52478
185	-2.399	1058.6	-2.65572	-0.168285	-2.46943				185	-1.752	1058.4	-1.68462	-0.162936	-1.52795
186	-2.393	1064.6	-2.64908	-0.168408	-2.46265				186	-1.754	1064.4	-1.68654	-0.162645	-1.53015
187	-2.388	1070.6	-2.64354	-0.168531	-2.45698				187	-1.755	1070.4	-1.6875	-0.162354	-1.53139
188	-2.383	1076.6	-2.63801	-0.168654	-2.45131				188	-1.757	1076.4	-1.68942	-0.162062	-1.53359
189	-2.379	1082.5	-2.58969	-0.168777	-2.40596				189	-1.759	1082.4	-1.69135	-0.161771	-1.5358
190	-2.374	1088.5	-2.62804	-0.168899	-2.44107				190	-1.762	1088.4	-1.69423	-0.16148	-1.53896
191	-2.37	1094.5	-2.62362	-0.169022	-2.43651				191	-1.763	1094.4	-1.69519	-0.161188	-1.5402
192	-2.367	1100.5	-2.6203	-0.169145	-2.43305				192	-1.765	1100.4	-1.69712	-0.160897	-1.54241
193	-2.363	1106.5	-2.61587	-0.169268	-2.42849				193	-1.767	1106.4	-1.69904	-0.160606	-1.54461
194	-2.359	1112.5	-2.61144	-0.169391	-2.42392				194	-1.769	1112.4	-1.70096	-0.160314	-1.54681
195	-2.355	1118.5	-2.60701	-0.169514	-2.41936				195	-1.772	1118.3	-1.67545	-0.160023	-1.52414
196	-2.352	1124.5	-2.60369	-0.169637	-2.4159				196	-1.774	1124.3	-1.70577	-0.159732	-1.55218
197	-2.348	1130.5	-2.59926	-0.16976	-2.41134				197	-1.776	1130.3	-1.70769	-0.15944	-1.55438
198	-2.344	1136.5	-2.59483	-0.169883	-2.40677				198	-1.779	1136.3	-1.71058	-0.159149	-1.55755
199	-2.34	1142.5	-2.59041	-0.170006	-2.40221				199	-1.782	1142.3	-1.71346	-0.158858	-1.56071
200	-2.337	1148.5	-2.58708	-0.170129	-2.39875				200	-1.786	1148.3	-1.71731	-0.158566	-1.56484
201	-2.334	1154.5	-2.58376	-0.170252	-2.39529				201	-1.79	1154.3	-1.72115	-0.158275	-1.56897
202	-2.33	1160.5	-2.57934	-0.170375	-2.39073				202	-1.793	1160.3	-1.72404	-0.157984	-1.57213
203	-2.326	1166.5	-2.57491	-0.170498	-2.38616				203	-1.797	1166.3	-1.72788	-0.157693	-1.57626
204	-2.323	1172.5	-2.57159	-0.170621	-2.38271				204	-1.802	1172.3	-1.73269	-0.157401	-1.58134
205	-2.319	1178.5	-2.56716	-0.170744	-2.37814				205	-1.807	1178.3	-1.7375	-0.15711	-1.58643
206	-2.315	1184.5	-2.56273	-0.170867	-2.37358				206	-1.813	1184.3	-1.74327	-0.156819	-1.59248
207	-2.312	1190.5	-2.55941	-0.17099	-2.37012				207	-1.818	1190.3	-1.74808	-0.156527	-1.59757
208	-2.308	1196.5	-2.55498	-0.171113	-2.36556				208	-1.824	1196.3	-1.75385	-0.156236	-1.60362
209	-2.304	1202.5	-2.55055	-0.171235	-2.36099				209	-1.831	1202.3	-1.76058	-0.155945	-1.61063
210	-2.301	1208.4	-2.50478	-0.171358	-2.31824				210	-1.837	1208.3	-1.76635	-0.155653	-1.61668
211	-2.298	1214.4	-2.54391	-0.171481	-2.35408				211	-1.844	1214.3	-1.77308	-0.155362	-1.62369
212	-2.294	1220.4	-2.53948	-0.171604	-2.34952				212	-1.852	1220.3	-1.78077	-0.155071	-1.63166
213	-2.29	1226.4	-2.53506	-0.171727	-2.34495				213	-1.858	1226.3	-1.78654	-0.154779	-1.63771
214	-2.287	1232.4	-2.53173	-0.17185	-2.34149				214	-1.865	1232.3	-1.79327	-0.154488	-1.64472
215	-2.283	1238.4	-2.52731	-0.171973	-2.33693				215	-1.869	1238.3	-1.79712	-0.154197	-1.64885
216	-2.28	1244.4	-2.52399	-0.172096	-2.33347				216	-1.873	1244.3	-1.80096	-0.153905	-1.65298
217	-2.277	1250.4	-2.52066	-0.172219	-2.33002				217	-1.873	1250.3	-1.80096	-0.153614	-1.65326
218	-2.273	1256.4	-2.51624	-0.172342	-2.32545				218	-1.869	1256.3	-1.79712	-0.153323	-1.64969
219	-2.267	1262.4	-2.50959	-0.172465	-2.31867				219	-1.861	1262.3	-1.78942	-0.153032	-1.64228
220	-2.258	1268.4	-2.49963	-0.172588	-2.30857				220	-1.848	1268.3	-1.77692	-0.15274	-1.63006
221	-2.247	1274.4	-2.48745	-0.172711	-2.29626				221	-1.83	1274.3	-1.75962	-0.152449	-1.61303
222	-2.235	1280.4	-2.47417	-0.172834	-2.28284				222	-1.813	1280.3	-1.74327	-0.152158	-1.59696
223	-2.223	1286.4	-2.46089	-0.172957	-2.26942				223	-1.796	1286.3	-1.72692	-0.151866	-1.5809
224	-2.21	1292.3	-2.40572	-0.17308	-2.21731				224	-1.78	1292.3	-1.71154	-0.151575	-1.56579
225	-2.198	1298.3	-2.43321	-0.173203	-2.24147				225	-1.765	1298.3	-1.69712	-0.151284	-1.55165
226	-2.187	1304.3	-2.42103	-0.173326	-2.22916				226	-1.753	1304.3	-1.68558	-0.150992	-1.54039
227	-2.177	1310.3	-2.40996	-0.173448	-2.21795				227	-1.743	1310.3	-1.67596	-0.150701	-1.53106
228	-2.167	1316.3	-2.39889	-0.173571	-2.20675				228	-1.735	1316.2	-1.64046	-0.15041	-1.49825
229	-2.156	1322.3	-2.38672	-0.173694	-2.19443				229	-1.728	1322.2	-1.66154	-0.150118	-1.51719
230	-2.148	1328.3	-2.37786	-0.173817	-2.18544				230	-1.721	1328.2	-1.65481	-0.149827	-1.51074
231	-2.14	1334.3	-2.369	-0.17394	-2.17645				231	-1.716	1334.2	-1.65	-0.149536	-1.50622
232	-2.133	1340.3	-2.36125	-0.174063	-2.16856				232	-1.713	1340.2	-1.64712	-0.149244	-1.50361
233	-2.125	1346.3	-2.3524	-0.174186	-2.15957				233	-1.711	1346.2	-1.64519	-0.148953	-1.50197
234	-2.118	1352.3	-2.34465	-0.174309	-2.15169				234	-1.71	1352.3	-1.67163	-0.148662	-1.52631
235	-2.109	1358.3	-2.33469	-0.174432	-2.14159				235	-1.71	1358.3	-1.64423	-0.14837	-1.50157
236	-2.099	1364.3	-2.32362	-0.174555	-2.13038				236	-1.71	1364.3	-1.64423	-0.148079	-1.50185
237	-2.089	1370.3	-2.31255	-0.174678	-2.11918				237	-1.715	1370.2	-1.62155	-0.147788	-1.48182
238	-2.081	1376.3	-2.30369	-0.174801	-2.11018				238	-1.719	1376.2	-1.65288	-0.147497	-1.51106
239	-2.071	1382.3	-2.29262	-0.174924	-2.09898				239	-1.719	1382.2	-1.65288	-0.147205	-1.51134
240	-2.062	1388.3	-2.28266	-0.175047	-2.08888				240	-1.717	1388.2	-1.65096	-0.146914	-1.5097
241	-2.052	1394.3	-2.27159	-0.17517	-2.07767				241	-1.715	1394.2	-1.64904	-0.146623	-1.50806
242	-2.043	1400.3	-2.26162	-0.175293	-2.06757				242	-1.71	1400.2	-1.64423	-0.146331	-1.50353
243	-2.034	1406.3	-2.25166	-0.175416	-2.05747				243	-1.706	1406.2	-1.64038	-0.14604	-1.49996
244	-2.022	1412.3	-2.23838	-0.175539	-2.04405				244	-1.703	1412.2	-1.6375	-0.145749	-1.49736
245	-2.013	1418.2	-2.19127	-0.175661	-2.00005				245	-1.743	1418.2	-1.67596	-0.145457	-1.5361
246	-2.003	1424.2	-2.21734	-0.175784	-2.02275				246	-1.727	1424.2	-1.66058	-0.145166	-1.52099
247	-1.991	1430.2	-2.20406	-0.175907	-2.00933				247	-1.681	1430.2	-1.61635	-0.144875	-1.47704
248	-1.982	1436.2	-2.1941	-0.17603	-1.99923				248	-1.685	1436.2	-1.62019	-0.144583	-1.48117
249	-1.973	1442.2	-2.18413	-0.176153	-1.98913				249	-1.673	1442.2	-1.60865	-0.144292	-1.46991
250	-1.962	1448.2	-2.17196	-0.176276	-1.97682				250	-1.663	1448.2	-1.59904	-0.144001	-1.46058
251	-1.952	1454.2	-2.16089	-0.176399	-1.96561				251	-1.656	1454.1	-1.56577	-0.143709	-1.42989
252	-1.942	1460.2	-2.14982	-0.176522	-1.9544				252	-1.647	1460.1	-1.58365	-0.143418	-1.44575
253	-1.931	1466.2	-2.13764	-0.176645	-1.94209				253	-1.632	1466.1	-1.56923	-0.143127	-1.43161
254	-1.92	1472.2	-2.12546	-0.176768	-1.92978				254	-1.612	1472.1	-1.55	-0.142836	-1.41266
255	-1.907	1478.2	-2.11107	-0.176891	-1.91525				255	-1.588	1478.1	-1.52692	-0.142544	-1.38986
256	-1.895	1484.2	-2.09779	-0.177014	-1.90183				256	-1.57	1484.1	-1.50962	-0.142253	-1.37283
257	-1.884	1490.2	-2.08561	-0.177137	-1.88952				257	-1.543	1490.1	-1.48365	-0.141962	-1.34715
258	-1.871	1496.1	-2.0367	-0.17726	-1.84374				258	-1.515	1496.1	-1.45673	-0.14167	-1.32051
259	-1.857	1502.1	-2.05572	-0.177383	-1.85935				259	-1.492	1502.1	-1.43462	-0.141379	-1.29867
260	-1.844	1508.1	-2.04133	-0.177506	-1.84483				260	-1.458	1508.1	-1.40192	-0.141088	-1.26626
261	-1.831	1514.1	-2.02694	-0.177629	-1.8303				261	-1.429	1514	-1.35114	-0.140796	-1.21801
262	-1.82	1520.1	-2.01476	-0.177752	-1.81799				262	-1.401	1520	-1.34712	-0.140505	-1.21201
263	-1.807	1526.1	-2.00037	-0.177875	-1.80346				263	-1.376	1526	-1.32308	-0.140214	-1.18826
264	-1.794	1532.1	-1.98598	-0.177997	-1.78893				264	-1.337	1532	-1.28558	-0.139922	-1.15104
265	-1.78	1538.1	-1.97048	-0.17812	-1.7733				265	-1.31	1538	-1.25962	-0.139631	-1.12535
266	-1.767	1544.1	-1.95609	-0.178243	-1.75877				266	-1.266	1544	-1.21731	-0.13934	-1.08333
267	-1.756	1550.1	-1.94391	-0.178366	-1.74646				267	-1.233	1550	-1.18558	-0.139048	-1.05188
268	-1.744	1556.1	-1.93063	-0.178489	-1.73304				268	-1.197	1556	-1.15096	-0.138757	-1.01754
269	-1.732	1562.1	-1.91734	-0.178612	-1.71962				269	-1.159	1561.9	-1.09585	-0.138466	-0.964928
270	-1.72	1568.1	-1.90406	-0.178735	-1.7062				270	-1.118	1567.9	-1.075	-0.138175	-0.94214
271	-1.709	1574.1	-1.89188	-0.178858	-1.69388				271	-1.076	1573.9	-1.03462	-0.137883	-0.902035
272	-1.697	1580.1	-1.8786	-0.178981	-1.68046				272	-1.036	1579.9	-0.996154	-0.137592	-0.863854
273	-1.685	1586.1	-1.86531	-0.179104	-1.66704				273	-0.998	1585.9	-0.959615	-0.137301	-0.827596
274	-1.674	1592.1	-1.85314	-0.179227	-1.65473				274	-0.952	1591.9	-0.915385	-0.137009	-0.783645
275	-1.663	1598.1	-1.84096	-0.17935	-1.64242				275	-0.906	1597.9	-0.871154	-0.136718	-0.739694
276	-1.652	1604.1	-1.82878	-0.179473	-1.6301				276	-0.866	1603.9	-0.832692	-0.136427	-0.701513
277	-1.642	1610	-1.78742	-0.179596	-1.59192				277	-0.817	1609.8	-0.772484	-0.136135	-0.643766
278	-1.631	1616	-1.80554	-0.179719	-1.60658				278	-0.762	1615.8	-0.732692	-0.135844	-0.602073
279	-1.619	1622	-1.79225	-0.179842	-1.59316				279	-0.713	1621.8	-0.685577	-0.135553	-0.555238
280	-1.609	1628	-1.78118	-0.179965	-1.58196				280	-0.664	1627.8	-0.638462	-0.135261	-0.508403
281	-1.599	1634	-1.77011	-0.180088	-1.57075				281	-0.615	1633.8	-0.591346	-0.13497	-0.461567
282	-1.589	1640	-1.75904	-0.18021	-1.55955				282	-0.567	1639.8	-0.545192	-0.134679	-0.415693
283	-1.58	1646	-1.74908	-0.180333	-1.54945				283	-0.506	1645.7	-0.478429	-0.134387	-0.351364
284	-1.572	1652	-1.74022	-0.180456	-1.54045				284	-0.457	1651.7	-0.439423	-0.134096	-0.310484
285	-1.563	1658	-1.73026	-0.180579	-1.53036				285	-0.403	1657.7	-0.3875	-0.133805	-0.258842	-0.36		-0.0413462
286	-1.553	1664	-1.71919	-0.180702	-1.51915				286	-0.35	1663.7	-0.336538	-0.133514	-0.20816	-0.36		0.00961538
287	-1.545	1670	-1.71033	-0.180825	-1.51016				287	-0.3	1669.7	-0.288462	-0.133222	-0.160363	-0.36		0.0576923
288	-1.538	1676	-1.70258	-0.180948	-1.50227				288	-0.255	1675.7	-0.245192	-0.132931	-0.117374	-0.36		0.100962
289	-1.53	1682	-1.69373	-0.181071	-1.49328				289	-0.21	1681.7	-0.201923	-0.13264	-0.074385	-0.36		0.144231
290	-1.523	1688	-1.68598	-0.181194	-1.48539				290	-0.167	1687.6	-0.157901	-0.132348	-0.0327637	-0.36		0.182484
291	-1.516	1694	-1.67823	-0.181317	-1.47751				291	-0.13	1693.6	-0.125	-0.132057	0.00197783	-0.36		0.221154
292	-1.509	1700	-1.67048	-0.18144	-1.46962				292	-0.103	1699.6	-0.0990385	-0.131766	0.0276593	-0.36		0.247115
293	-1.502	1706	-1.66273	-0.181563	-1.46174				293	-0.076	1705.6	-0.0730769	-0.131474	0.0533407	-0.36		0.273077
294	-1.495	1712	-1.65498	-0.181686	-1.45385				294	-0.042	1711.6	-0.0403846	-0.131183	0.0857529	-0.36		0.305769
295	-1.488	1718	-1.64723	-0.181809	-1.44597				295	-0.014	1717.6	-0.0134615	-0.130892	0.112396	-0.36		0.332692
296	-1.482	1724	-1.64059	-0.181932	-1.43919				296	0.004	1723.6	0.00384615	-0.1306	0.129423	-0.36		0.35
297	-1.476	1730	-1.63395	-0.182055	-1.43241				297	0.03	1729.6	0.0288462	-0.130309	0.154143	-0.36		0.375
298	-1.47	1736	-1.62731	-0.182178	-1.42563				298	0.059	1735.6	0.0567308	-0.130018	0.181748	-0.36		0.402885
299	-1.465	1742	-1.62177	-0.182301	-1.41996				299	0.078	1741.6	0.075	-0.129726	0.199737	-0.36		0.421154
300	-1.46	1747.9	-1.5893	-0.182423	-1.39072				300	0.103	1747.5	0.0973878	-0.129435	0.21977	-0.36		0.437772
301	-1.456	1753.9	-1.61181	-0.182546	-1.40973				301	0.13	1753.5	0.125	-0.129144	0.249177	-0.36		0.471154
302	-1.451	1759.9	-1.60627	-0.182669	-1.40406				302	0.152	1759.5	0.146154	-0.128852	0.27005	-0.36		0.492308
303	-1.446	1765.9	-1.60074	-0.182792	-1.39838				303	0.177	1765.5	0.170192	-0.128561	0.293809	-0.36		0.516346
304	-1.442	1771.9	-1.59631	-0.182915	-1.39382				304	0.207	1771.5	0.199038	-0.12827	0.322375	-0.36		0.545192
305	-1.438	1777.9	-1.59188	-0.183038	-1.38926				305	0.235	1777.5	0.225962	-0.127979	0.349018	-0.36		0.572115
306	-1.433	1783.9	-1.58635	-0.183161	-1.38359				306	0.261	1783.5	0.250962	-0.127687	0.373738	-0.36		0.597115
307	-1.428	1789.9	-1.58081	-0.183284	-1.37791				307	0.289	1789.5	0.277885	-0.127396	0.400381	-0.36		0.624038
308	-1.423	1795.9	-1.57528	-0.183407	-1.37224				308	0.323	1795.5	0.310577	-0.127105	0.432793	-0.36		0.656731
309	-1.416	1801.9	-1.56753	-0.18353	-1.36436				309	0.361	1801.5	0.347115	-0.126813	0.469051	-0.36		0.693269
310	-1.411	1807.9	-1.56199	-0.183653	-1.35869				310	0.396	1807.5	0.380769	-0.126522	0.502425	-0.36		0.726923
311	-1.405	1813.9	-1.55535	-0.183776	-1.35191				311	0.43	1813.5	0.413462	-0.126231	0.534837	-0.36		0.759615
312	-1.399	1819.9	-1.54871	-0.183899	-1.34513				312	0.469	1819.4	0.443446	-0.125939	0.562523	-0.36		0.78383
313	-1.393	1825.9	-1.54207	-0.184022	-1.33835				313	0.517	1825.4	0.497115	-0.125648	0.617931	-0.36		0.843269
314	-1.389	1831.9	-1.53764	-0.184145	-1.33379				314	0.557	1831.4	0.535577	-0.125357	0.656112	-0.36		0.881731
315	-1.385	1837.9	-1.53321	-0.184268	-1.32922				315	0.6	1837.4	0.576923	-0.125065	0.697178	-0.36		0.923077
316	-1.38	1843.9	-1.52768	-0.184391	-1.32355				316	0.642	1843.4	0.617308	-0.124774	0.737283	-0.36		0.963462
317	-1.377	1849.9	-1.52435	-0.184514	-1.3201				317	0.688	1849.4	0.661538	-0.124483	0.781233	-0.36		1.00769
318	-1.374	1855.9	-1.52103	-0.184636	-1.31664				318	0.726	1855.4	0.698077	-0.124191	0.817492	-0.36		1.04423
319	-1.373	1861.9	-1.51993	-0.184759	-1.3154				319	0.77	1861.4	0.740385	-0.1239	0.859519	-0.36		1.08654
320	-1.372	1867.9	-1.51882	-0.184882	-1.31415				320	0.807	1867.4	0.775962	-0.123609	0.894816	-0.36		1.12212
321	-1.371	1873.9	-1.51771	-0.185005	-1.31291				321	0.846	1873.3	0.799904	-0.123318	0.916502	-0.36		1.14029
322	-1.371	1879.9	-1.51771	-0.185128	-1.31277				322	0.873	1879.3	0.839423	-0.123026	0.957718	-0.36		1.18558
323	-1.371	1885.9	-1.51771	-0.185251	-1.31264				323	0.897	1885.3	0.8625	-0.122735	0.980514	-0.36		1.20865
324	-1.371	1891.9	-1.51771	-0.185374	-1.3125				324	0.921	1891.3	0.885577	-0.122444	1.00331	-0.36		1.23173
325	-1.37	1897.9	-1.51661	-0.185497	-1.31126				325	0.935	1897.3	0.899038	-0.122152	1.01649	-0.36		1.24519
326	-1.369	1903.9	-1.5155	-0.18562	-1.31001				326	0.946	1903.3	0.909615	-0.121861	1.02679	-0.36		1.25577
327	-1.366	1909.9	-1.51218	-0.185743	-1.30656				327	0.951	1909.3	0.914423	-0.12157	1.03132	-0.36		1.26058
328	-1.362	1915.9	-1.50775	-0.185866	-1.30199				328	0.949	1915.3	0.9125	-0.121278	1.02911	-0.36		1.25865
329	-1.359	1921.9	-1.50443	-0.185989	-1.29854				329	0.926	1921.3	0.890385	-0.120987	1.00672	-0.36		1.23654
330	-1.354	1927.9	-1.49889	-0.186112	-1.29287				330	0.881	1927.3	0.847115	-0.120696	0.963169	-0.36		1.19327
331	-1.349	1933.9	-1.49336	-0.186235	-1.28719				331	0.813	1933.4	0.79476	-0.120404	0.912463	-0.36		1.14668
332	-1.342	1939.9	-1.48561	-0.186358	-1.27931				332	0.737	1939.4	0.708654	-0.120113	0.824147	-0.36		1.05481
333	-1.337	1945.9	-1.48007	-0.186481	-1.27364				333	0.644	1945.4	0.619231	-0.119822	0.734444	-0.36		0.965385
334	-1.33	1951.9	-1.47232	-0.186604	-1.26575				334	0.552	1951.4	0.530769	-0.11953	0.645702	-0.36		0.876923
335	-1.323	1957.9	-1.46458	-0.186727	-1.25787				335	0.458	1957.5	0.447724	-0.119239	0.564288	-0.36		0.799647
336	-1.316	1963.9	-1.45683	-0.18685	-1.24998				336	0.36	1963.5	0.346154	-0.118948	0.460527	-0.36		0.692308
337	-1.307	1969.9	-1.44686	-0.186972	-1.23988				337	0.258	1969.5	0.248077	-0.118657	0.36217	-0.36		0.594231
338	-1.3	1975.9	-1.43911	-0.187095	-1.232				338	0.168	1975.5	0.161538	-0.118365	0.275351	-0.36		0.507692
339	-1.292	1981.9	-1.43026	-0.187218	-1.22301				339	0.081	1981.6	0.0791827	-0.118074	0.194607	-0.36		0.431106
340	-1.284	1987.9	-1.4214	-0.187341	-1.21401				340	0.002	1987.6	0.00192308	-0.117783	0.115176	-0.36		0.348077
341	-1.274	1993.9	-1.41033	-0.187464	-1.20281				341	-0.062	1993.6	-0.0596154	-0.117491	0.053357	-0.36		0.286538
342	-1.266	1999.9	-1.40148	-0.187587	-1.19381				342	-0.125	1999.6	-0.120192	-0.1172	-0.00750005	-0.36		0.225962
343	-1.258	2005.9	-1.39262	-0.18771	-1.18482				343	-0.18	2005.6	-0.173077	-0.116909	-0.0606648	-0.36		0.173077
344	-1.249	2011.9	-1.38266	-0.187833	-1.17472				344	-0.222	2011.7	-0.217019	-0.116617	-0.103018	-0.36		0.134904
345	-1.241	2017.9	-1.3738	-0.187956	-1.16573				345	-0.257	2017.7	-0.247115	-0.116326	-0.135263	-0.36		0.0990385
346	-1.232	2023.9	-1.36384	-0.188079	-1.15563				346	-0.285	2023.7	-0.274038	-0.116035	-0.162467	-0.36		0.0721154
347	-1.223	2029.9	-1.35387	-0.188202	-1.14553				347	-0.305	2029.7	-0.293269	-0.115743	-0.181978	-0.36		0.0528846
348	-1.213	2035.9	-1.3428	-0.188325	-1.13433				348	-0.32	2035.7	-0.307692	-0.115452	-0.196681	-0.36		0.0384615
349	-1.204	2041.8	-1.31063	-0.188448	-1.10549				349	-0.336	2041.7	-0.323077	-0.115161	-0.212345	-0.36		0.0230769
350	-1.193	2047.8	-1.32066	-0.188571	-1.11191				350	-0.347	2047.7	-0.333654	-0.114869	-0.223202	-0.36		0.0125
351	-1.184	2053.8	-1.3107	-0.188694	-1.10182				351	-0.356	2053.7	-0.342308	-0.114578	-0.232136	-0.36		0.00384615
352	-1.175	2059.8	-1.30074	-0.188817	-1.09172				352	-0.363	2059.7	-0.349038	-0.114287	-0.239147	-0.36		-0.00288462
353	-1.165	2065.8	-1.28967	-0.18894	-1.08051				353	-0.367	2065.7	-0.352885	-0.113995	-0.243274
354	-1.155	2071.8	-1.2786	-0.189063	-1.0693				354	-0.369	2071.7	-0.354808	-0.113704	-0.245477
355	-1.146	2077.8	-1.26863	-0.189185	-1.0592				355	-0.369	2077.7	-0.354808	-0.113413	-0.245757
356	-1.136	2083.8	-1.25756	-0.189308	-1.048				356	-0.366	2083.7	-0.351923	-0.113122	-0.243152
357	-1.125	2089.8	-1.24539	-0.189431	-1.03568				357	-0.362	2089.7	-0.348077	-0.11283	-0.239586
358	-1.115	2095.8	-1.23432	-0.189554	-1.02448				358	-0.358	2095.7	-0.344231	-0.112539	-0.23602
359	-1.104	2101.8	-1.22214	-0.189677	-1.01217				359	-0.352	2101.7	-0.338462	-0.112248	-0.230531
360	-1.095	2107.8	-1.21218	-0.1898	-1.00207				360	-0.345	2107.7	-0.331731	-0.111956	-0.22408
361	-1.083	2113.8	-1.19889	-0.189923	-0.988646				361	-0.338	2113.7	-0.325	-0.111665	-0.21763
362	-1.075	2119.8	-1.19004	-0.190046	-0.979654				362	-0.329	2119.7	-0.316346	-0.111374	-0.209256
363	-1.066	2125.8	-1.18007	-0.190169	-0.969555				363	-0.32	2125.7	-0.307692	-0.111082	-0.200882
364	-1.059	2131.8	-1.17232	-0.190292	-0.961669				364	-0.312	2131.7	-0.3	-0.110791	-0.19347
365	-1.05	2137.8	-1.16236	-0.190415	-0.95157				365	-0.303	2137.7	-0.291346	-0.1105	-0.185096
366	-1.043	2143.8	-1.15461	-0.190538	-0.943685				366	-0.295	2143.7	-0.283654	-0.110208	-0.177684
367	-1.036	2149.8	-1.14686	-0.190661	-0.9358				367	-0.285	2149.7	-0.274038	-0.109917	-0.168349
368	-1.03	2155.8	-1.14022	-0.190784	-0.929022				368	-0.278	2155.7	-0.267308	-0.109626	-0.161898
369	-1.024	2161.8	-1.13358	-0.190907	-0.922243				369	-0.269	2161.7	-0.258654	-0.109334	-0.153525
370	-1.02	2167.8	-1.12915	-0.19103	-0.917679				370	-0.262	2167.7	-0.251923	-0.109043	-0.147074
371	-1.017	2173.8	-1.12583	-0.191153	-0.914222				371	-0.255	2173.7	-0.245192	-0.108752	-0.140623
372	-1.012	2179.8	-1.1203	-0.191276	-0.908551				372	-0.247	2179.7	-0.2375	-0.108461	-0.133211
373	-1.009	2185.8	-1.11697	-0.191398	-0.905094				373	-0.24	2185.7	-0.230769	-0.108169	-0.12676
374	-1.007	2191.8	-1.11476	-0.191521	-0.902744				374	-0.232	2191.7	-0.223077	-0.107878	-0.119348
375	-1.004	2197.8	-1.11144	-0.191644	-0.899287				375	-0.224	2197.7	-0.215385	-0.107587	-0.111936
376	-1.002	2203.8	-1.10923	-0.191767	-0.896937				376	-0.217	2203.7	-0.208654	-0.107295	-0.105485
377	-1	2209.8	-1.10701	-0.19189	-0.894586				377	-0.208	2209.7	-0.2	-0.107004	-0.0971116
378	-0.999	2215.8	-1.1059	-0.192013	-0.893343				378	-0.204	2215.7	-0.196154	-0.106713	-0.0935455
379	-0.995	2221.8	-1.10148	-0.192136	-0.888779				379	-0.191	2221.7	-0.183654	-0.106421	-0.0813256
380	-0.994	2227.8	-1.10037	-0.192259	-0.887536				380	-0.187	2227.7	-0.179808	-0.10613	-0.0777596
381	-0.99	2233.8	-1.09594	-0.192382	-0.882972				381	-0.179	2233.7	-0.172115	-0.105839	-0.0703474
382	-0.987	2239.8	-1.09262	-0.192505	-0.879515				382	-0.173	2239.7	-0.166346	-0.105547	-0.0648583
383	-0.982	2245.8	-1.08708	-0.192628	-0.873844				383	-0.167	2245.7	-0.160577	-0.105256	-0.0593691
384	-0.977	2251.8	-1.08155	-0.192751	-0.868172				384	-0.161	2251.7	-0.154808	-0.104965	-0.05388
385	-0.971	2257.8	-1.07491	-0.192874	-0.861394				385	-0.155	2257.7	-0.149038	-0.104673	-0.0483909
386	-0.964	2263.8	-1.06716	-0.192997	-0.853509				386	-0.149	2263.7	-0.143269	-0.104382	-0.0429018
387	-0.957	2269.8	-1.05941	-0.19312	-0.845624				387	-0.144	2269.7	-0.138462	-0.104091	-0.0383742
388	-0.95	2275.8	-1.05166	-0.193243	-0.837739				388	-0.138	2275.7	-0.132692	-0.1038	-0.0328851
389	-0.943	2281.8	-1.04391	-0.193366	-0.829854				389	-0.133	2281.7	-0.127885	-0.103508	-0.0283575
390	-0.934	2287.8	-1.03395	-0.193489	-0.819754				390	-0.127	2287.7	-0.122115	-0.103217	-0.0228684
391	-0.926	2293.8	-1.02509	-0.193612	-0.810762				391	-0.122	2293.7	-0.117308	-0.102926	-0.0183408
392	-0.918	2299.8	-1.01624	-0.193734	-0.80177				392	-0.117	2299.7	-0.1125	-0.102634	-0.0138132
393	-0.91	2305.8	-1.00738	-0.193857	-0.792778				393	-0.113	2305.7	-0.108654	-0.102343	-0.0102472
394	-0.901	2311.8	-0.997417	-0.19398	-0.782679				394	-0.108	2311.7	-0.103846	-0.102052	-0.00571958
395	-0.892	2317.8	-0.987454	-0.194103	-0.772579				395	-0.105	2317.7	-0.100962	-0.10176	-0.00311507
396	-0.884	2323.8	-0.978598	-0.194226	-0.763587				396	-0.101	2323.7	-0.0971154	-0.101469	0.000450976
397	-0.875	2329.8	-0.968635	-0.194349	-0.753488				397	-0.097	2329.7	-0.0932692	-0.101178	0.00401702
398	-0.866	2335.8	-0.958672	-0.194472	-0.743389				398	-0.094	2335.7	-0.0903846	-0.100886	0.00662153
399	-0.859	2341.8	-0.950923	-0.194595	-0.735504				399	-0.09	2341.7	-0.0865385	-0.100595	0.0101876
400	-0.85	2347.7	-0.925277	-0.194718	-0.713314				400	-0.088	2347.7	-0.0846154	-0.100304	0.0118305
401	-0.842	2353.8	-0.947638	-0.194841	-0.728352				401	-0.085	2353.7	-0.0817308	-0.100012	0.014435
402	-0.834	2359.8	-0.923247	-0.194964	-0.70742				402	-0.083	2359.7	-0.0798077	-0.0997211	0.016078
403	-0.827	2365.8	-0.915498	-0.195087	-0.699535				403	-0.08	2365.7	-0.0769231	-0.0994298	0.0186825
404	-0.819	2371.7	-0.891531	-0.19521	-0.679034				404	-0.079	2371.7	-0.0759615	-0.0991385	0.0193639
405	-0.812	2377.7	-0.898893	-0.195333	-0.682657				405	-0.076	2377.7	-0.0730769	-0.0988472	0.0219685
406	-0.805	2383.7	-0.891144	-0.195456	-0.674772				406	-0.073	2383.7	-0.0701923	-0.0985559	0.024573
407	-0.799	2389.7	-0.884502	-0.195579	-0.667994				407	-0.071	2389.7	-0.0682692	-0.0982646	0.0262159
408	-0.793	2395.7	-0.87786	-0.195702	-0.661216				408	-0.07	2395.7	-0.0673077	-0.0979733	0.0268974
409	-0.787	2401.7	-0.871218	-0.195825	-0.654438				409	-0.069	2401.7	-0.0663462	-0.0976819	0.0275788
410	-0.781	2407.8	-0.878985	-0.195947	-0.658454				410	-0.068	2407.7	-0.0653846	-0.0973906	0.0282602
411	-0.775	2413.8	-0.857934	-0.19607	-0.640881				411	-0.067	2413.7	-0.0644231	-0.0970993	0.0289416
412	-0.77	2419.8	-0.852399	-0.196193	-0.63521				412	-0.066	2419.7	-0.0634615	-0.096808	0.0296231
413	-0.765	2425.8	-0.846863	-0.196316	-0.629539				413	-0.065	2425.7	-0.0625	-0.0965167	0.0303045
414	-0.76	2431.8	-0.841328	-0.196439	-0.623868				414	-0.063	2431.7	-0.0605769	-0.0962254	0.0319475
415	-0.756	2437.8	-0.8369	-0.196562	-0.619304				415	-0.062	2437.7	-0.0596154	-0.0959341	0.0326289
416	-0.752	2443.8	-0.832472	-0.196685	-0.61474				416	-0.061	2443.7	-0.0586538	-0.0956427	0.0333103
417	-0.747	2449.8	-0.826937	-0.196808	-0.609069				417	-0.06	2449.7	-0.0576923	-0.0953514	0.0339918
418	-0.743	2455.8	-0.822509	-0.196931	-0.604504				418	-0.058	2455.7	-0.0557692	-0.0950601	0.0356347
419	-0.739	2461.8	-0.818081	-0.197054	-0.59994				419	-0.056	2461.7	-0.0538462	-0.0947688	0.0372777
420	-0.735	2467.8	-0.813653	-0.197177	-0.595376				420	-0.055	2467.7	-0.0528846	-0.0944775	0.0379591
421	-0.731	2473.8	-0.809225	-0.1973	-0.590812				421	-0.054	2473.8	-0.0527885	-0.0941862	0.0392846
422	-0.727	2479.8	-0.804797	-0.197423	-0.586248				422	-0.054	2479.7	-0.0510577	-0.0938949	0.0377211
423	-0.724	2485.8	-0.801476	-0.197546	-0.582791				423	-0.053	2485.7	-0.0509615	-0.0936035	0.0390419
424	-0.721	2491.8	-0.798155	-0.197669	-0.579334				424	-0.05	2491.7	-0.0480769	-0.0933122	0.0416464
425	-0.717	2497.8	-0.793727	-0.197792	-0.574769				425	-0.048	2497.7	-0.0461538	-0.0930209	0.0432893
426	-0.713	2503.8	-0.789299	-0.197915	-0.570205				426	-0.047	2503.7	-0.0451923	-0.0927296	0.0439708
427	-0.71	2509.8	-0.785978	-0.198038	-0.566748				427	-0.045	2509.8	-0.0439904	-0.0924383	0.046374
428	-0.706	2515.8	-0.78155	-0.19816	-0.562184				428	-0.042	2515.8	-0.0403846	-0.092147	0.0482183
429	-0.702	2521.8	-0.777122	-0.198283	-0.55762				429	-0.04	2521.8	-0.0384615	-0.0918557	0.0498612
430	-0.699	2527.8	-0.773801	-0.198406	-0.554163				430	-0.038	2527.8	-0.0365385	-0.0915644	0.0515042
431	-0.695	2533.8	-0.769373	-0.198529	-0.549599				431	-0.036	2533.8	-0.0346154	-0.091273	0.0531472
432	-0.692	2539.8	-0.766052	-0.198652	-0.546141				432	-0.035	2539.8	-0.0336538	-0.0909817	0.0538286
433	-0.689	2545.8	-0.762731	-0.198775	-0.542684				433	-0.033	2545.8	-0.0317308	-0.0906904	0.0554716
434	-0.686	2551.8	-0.75941	-0.198898	-0.539227				434	-0.03	2551.8	-0.0288462	-0.0903991	0.0580761
435	-0.684	2557.8	-0.757196	-0.199021	-0.536877				435	-0.028	2557.8	-0.0269231	-0.0901078	0.059719
436	-0.68	2563.8	-0.752768	-0.199144	-0.532313				436	-0.027	2563.8	-0.0259615	-0.0898165	0.0604005
437	-0.677	2569.8	-0.749446	-0.199267	-0.528856				437	-0.025	2569.7	-0.0236378	-0.0895252	0.0610094
438	-0.675	2575.8	-0.747232	-0.19939	-0.526506				438	-0.023	2575.8	-0.022484	-0.0892338	0.0647478
439	-0.671	2581.8	-0.742804	-0.199513	-0.521941				439	-0.02	2581.8	-0.0192308	-0.0889425	0.0662909
440	-0.668	2587.8	-0.739483	-0.199636	-0.518484				440	-0.017	2587.8	-0.0163462	-0.0886512	0.0688954
441	-0.665	2593.8	-0.736162	-0.199759	-0.515027				441	-0.015	2593.8	-0.0144231	-0.0883599	0.0705384
442	-0.662	2599.8	-0.732841	-0.199882	-0.51157				442	-0.013	2599.8	-0.0125	-0.0880686	0.0721813
443	-0.66	2605.8	-0.730627	-0.200005	-0.50922				443	-0.011	2605.8	-0.0105769	-0.0877773	0.0738243
444	-0.656	2611.8	-0.726199	-0.200128	-0.504656				444	-0.008	2611.8	-0.00769231	-0.087486	0.0764288
445	-0.652	2617.8	-0.721771	-0.200251	-0.500092				445	-0.006	2617.8	-0.00576923	-0.0871947	0.0780718
446	-0.648	2623.8	-0.717343	-0.200374	-0.495527				446	-0.004	2623.8	-0.00384615	-0.0869033	0.0797147
447	-0.645	2629.8	-0.714022	-0.200496	-0.49207				447	-0.002	2629.8	-0.00192308	-0.086612	0.0813577
448	-0.642	2635.8	-0.710701	-0.200619	-0.488613				448	0.001	2635.8	0.000961538	-0.0863207	0.0839622
449	-0.638	2641.8	-0.706273	-0.200742	-0.484049				449	0.003	2641.8	0.00288462	-0.0860294	0.0856052
450	-0.635	2647.8	-0.702952	-0.200865	-0.480592				450	0.007	2647.8	0.00673077	-0.0857381	0.0891712
451	-0.63	2653.8	-0.697417	-0.200988	-0.474921				451	0.008	2653.8	0.00769231	-0.0854468	0.0898527
452	-0.627	2659.8	-0.694096	-0.201111	-0.471464				452	0.011	2659.8	0.0105769	-0.0851555	0.0924572
453	-0.623	2665.8	-0.689668	-0.201234	-0.466899				453	0.013	2665.8	0.0125	-0.0848641	0.0941001
454	-0.618	2671.8	-0.684133	-0.201357	-0.461228				454	0.015	2671.8	0.0144231	-0.0845728	0.0957431
455	-0.614	2677.8	-0.679705	-0.20148	-0.456664				455	0.017	2677.8	0.0163462	-0.0842815	0.0973861
456	-0.61	2683.8	-0.675277	-0.201603	-0.4521				456	0.016	2683.8	0.0153846	-0.0839902	0.0961444
457	-0.606	2689.8	-0.670849	-0.201726	-0.447536				457	0.018	2689.8	0.0173077	-0.0836989	0.0977874
458	-0.602	2695.8	-0.666421	-0.201849	-0.442972				458	0.02	2695.8	0.0192308	-0.0834076	0.0994304
459	-0.598	2701.8	-0.661993	-0.201972	-0.438408				459	0.023	2701.8	0.0221154	-0.0831163	0.102035
460	-0.593	2707.8	-0.656458	-0.202095	-0.432736				460	0.027	2707.8	0.0259615	-0.0828249	0.105601
461	-0.589	2713.8	-0.65203	-0.202218	-0.428172				461	0.029	2713.8	0.0278846	-0.0825336	0.107244
462	-0.585	2719.8	-0.647601	-0.202341	-0.423608				462	0.029	2719.8	0.0278846	-0.0822423	0.106964
463	-0.581	2725.8	-0.643173	-0.202464	-0.419044				463	0.031	2725.8	0.0298077	-0.081951	0.108607
464	-0.577	2731.8	-0.638745	-0.202587	-0.41448				464	0.032	2731.8	0.0307692	-0.0816597	0.109288
465	-0.573	2737.8	-0.634317	-0.202709	-0.409916				465	0.035	2737.8	0.0336538	-0.0813684	0.111893
466	-0.569	2743.8	-0.629889	-0.202832	-0.405352				466	0.036	2743.8	0.0346154	-0.0810771	0.112574
467	-0.565	2749.8	-0.625461	-0.202955	-0.400787				467	0.037	2749.8	0.0355769	-0.0807858	0.113256
468	-0.56	2755.8	-0.619926	-0.203078	-0.395116				468	0.039	2755.8	0.0375	-0.0804944	0.114898
469	-0.555	2761.8	-0.614391	-0.203201	-0.389445				469	0.04	2761.8	0.0384615	-0.0802031	0.11558
470	-0.552	2767.8	-0.61107	-0.203324	-0.385988				470	0.042	2767.8	0.0403846	-0.0799118	0.117223
471	-0.547	2773.8	-0.605535	-0.203447	-0.380317				471	0.044	2773.8	0.0423077	-0.0796205	0.118866
472	-0.54	2779.8	-0.597786	-0.20357	-0.372432				472	0.045	2779.8	0.0432692	-0.0793292	0.119547
473	-0.535	2785.8	-0.592251	-0.203693	-0.36676				473	0.047	2785.8	0.0451923	-0.0790379	0.12119
474	-0.529	2791.8	-0.585609	-0.203816	-0.359982				474	0.048	2791.8	0.0461538	-0.0787466	0.121872
475	-0.523	2797.8	-0.578967	-0.203939	-0.353204				475	0.051	2797.8	0.0490385	-0.0784552	0.124476
476	-0.517	2803.8	-0.572325	-0.204062	-0.346426				476	0.051	2803.8	0.0490385	-0.0781639	0.124196
477	-0.491	2809.9	-0.552601	-0.204185	-0.322799				477	0.052	2809.8	0.05	-0.0778726	0.124878
478	-0.482	2816.1	-0.551365	-0.204308	-0.317655				478	0.053	2815.8	0.0509615	-0.0775813	0.125559
479	-0.49	2822.1	-0.542435	-0.204431	-0.316128				479	0.057	2821.8	0.0548077	-0.07729	0.129125
480	-0.492	2828	-0.535572	-0.204554	-0.312903				480	0.059	2827.8	0.0567308	-0.0769987	0.130768
481	-0.489	2833.9	-0.532306	-0.204677	-0.309503				481	0.059	2833.8	0.0567308	-0.0767074	0.130488
482	-0.484	2839.9	-0.535793	-0.2048	-0.309078				482	0.062	2839.8	0.0596154	-0.076416	0.133092
483	-0.479	2845.9	-0.530258	-0.204922	-0.303407				483	0.064	2845.8	0.0615385	-0.0761247	0.134735
484	-0.474	2851.8	-0.515978	-0.205045	-0.292773				484	0.065	2851.8	0.0625	-0.0758334	0.135417
485	-0.468	2857.8	-0.518081	-0.205168	-0.290958				485	0.069	2857.8	0.0663462	-0.0755421	0.138983
486	-0.463	2863.8	-0.512546	-0.205291	-0.285286				486	0.071	2863.8	0.0682692	-0.0752508	0.140626
487	-0.457	2869.8	-0.505904	-0.205414	-0.278508				487	0.072	2869.8	0.0692308	-0.0749595	0.141307
488	-0.452	2875.8	-0.500369	-0.205537	-0.272837				488	0.073	2875.9	0.0713622	-0.0746682	0.144355
489	-0.445	2881.8	-0.49262	-0.20566	-0.264952				489	0.073	2881.9	0.0701923	-0.0743769	0.141709
490	-0.44	2887.8	-0.487085	-0.205783	-0.259281				490	0.073	2887.9	0.0701923	-0.0740855	0.141428
491	-0.434	2893.8	-0.480443	-0.205906	-0.252503				491	0.073	2893.9	0.0701923	-0.0737942	0.141148
492	-0.429	2899.8	-0.474908	-0.206029	-0.246831				492	0.072	2899.9	0.0692308	-0.0735029	0.139907
493	-0.424	2905.8	-0.469373	-0.206152	-0.24116				493	0.072	2905.9	0.0692308	-0.0732116	0.139627
494	-0.419	2911.8	-0.463838	-0.206275	-0.235489				494	0.072	2911.9	0.0692308	-0.0729203	0.139346
495	-0.413	2917.8	-0.457196	-0.206398	-0.228711				495	0.071	2917.9	0.0682692	-0.072629	0.138105
496	-0.408	2923.8	-0.451661	-0.206521	-0.22304				496	0.071	2923.9	0.0682692	-0.0723377	0.137825
497	-0.404	2929.8	-0.447232	-0.206644	-0.218476				497	0.07	2929.9	0.0673077	-0.0720463	0.136583
498	-0.398	2935.8	-0.44059	-0.206767	-0.211697				498	0.07	2935.9	0.0673077	-0.071755	0.136303
499	-0.394	2941.8	-0.436162	-0.20689	-0.207133				499	0.069	2941.9	0.0663462	-0.0714637	0.135061
500	-0.389	2947.8	-0.430627	-0.207013	-0.201462				500	0.069	2947.9	0.0663462	-0.0711724	0.134781
501	-0.385	2953.8	-0.426199	-0.207136	-0.196898				501	0.068	2953.9	0.0653846	-0.0708811	0.13354
502	-0.381	2959.8	-0.421771	-0.207258	-0.192334				502	0.067	2959.9	0.0644231	-0.0705898	0.132298
503	-0.376	2965.8	-0.416236	-0.207381	-0.186663				503	0.065	2965.9	0.0625	-0.0702985	0.130095
504	-0.372	2971.8	-0.411808	-0.207504	-0.182099				504	0.064	2971.9	0.0615385	-0.0700072	0.128853
505	-0.367	2977.8	-0.406273	-0.207627	-0.176427				505	0.063	2977.9	0.0605769	-0.0697158	0.127611
506	-0.363	2983.8	-0.401845	-0.20775	-0.171863				506	0.062	2983.9	0.0596154	-0.0694245	0.12637
507	-0.358	2989.8	-0.39631	-0.207873	-0.166192				507	0.06	2989.9	0.0576923	-0.0691332	0.124167
508	-0.354	2995.8	-0.391882	-0.207996	-0.161628				508	0.058	2995.9	0.0557692	-0.0688419	0.121963
509	-0.351	3001.8	-0.388561	-0.208119	-0.158171				509	0.057	3001.9	0.0548077	-0.0685506	0.120722
510	-0.347	3007.8	-0.384133	-0.208242	-0.153607				510	0.054	3007.9	0.0519231	-0.0682593	0.117557
511	-0.344	3013.8	-0.380812	-0.208365	-0.150149				511	0.052	3013.9	0.05	-0.067968	0.115354
512	-0.34	3019.8	-0.376384	-0.208488	-0.145585				512	0.05	3019.9	0.0480769	-0.0676766	0.113151
513	-0.336	3025.8	-0.371956	-0.208611	-0.141021				513	0.048	3025.9	0.0461538	-0.0673853	0.110947
514	-0.333	3031.8	-0.368635	-0.208734	-0.137564				514	0.045	3031.9	0.0432692	-0.067094	0.107783
515	-0.329	3037.8	-0.364207	-0.208857	-0.133				515	0.042	3037.9	0.0403846	-0.0668027	0.104618
516	-0.326	3043.8	-0.360886	-0.20898	-0.129543				516	0.039	3043.9	0.0375	-0.0665114	0.101453
517	-0.322	3049.8	-0.356458	-0.209103	-0.124979				517	0.037	3049.9	0.0355769	-0.0662201	0.0992501
518	-0.319	3055.8	-0.353137	-0.209226	-0.121522				518	0.034	3056	0.0332372	-0.0659288	0.0976868
519	-0.316	3061.8	-0.349815	-0.209349	-0.118064				519	0.031	3062	0.0298077	-0.0656374	0.0929206
520	-0.312	3067.8	-0.345387	-0.209471	-0.1135				520	0.028	3068	0.0269231	-0.0653461	0.0897559
521	-0.309	3073.8	-0.342066	-0.209594	-0.110043				521	0.025	3074	0.0240385	-0.0650548	0.0865912
522	-0.305	3079.8	-0.337638	-0.209717	-0.105479				522	0.021	3080	0.0201923	-0.0647635	0.0824649
523	-0.302	3085.8	-0.334317	-0.20984	-0.102022				523	0.019	3086	0.0182692	-0.0644722	0.0802617
524	-0.299	3091.9	-0.336513	-0.209963	-0.100207				524	0.016	3092	0.0153846	-0.0641809	0.077097
525	-0.296	3097.9	-0.327675	-0.210086	-0.0951075				525	0.013	3098	0.0125	-0.0638896	0.0739323
526	-0.292	3103.9	-0.323247	-0.210209	-0.0905434				526	0.01	3104	0.00961538	-0.0635983	0.0707676
527	-0.289	3109.9	-0.319926	-0.210332	-0.0870863				527	0.007	3110	0.00673077	-0.0633069	0.0676028
528	-0.286	3115.9	-0.316605	-0.210455	-0.0836291				528	0.002	3116	0.00192308	-0.0630156	0.062515
529	-0.283	3121.9	-0.313284	-0.210578	-0.080172				529	0	3122	0	-0.0627243	0.0603118
530	-0.279	3127.9	-0.308856	-0.210701	-0.0756078				530	-0.003	3128	-0.00288462	-0.062433	0.0571471
531	-0.277	3133.9	-0.306642	-0.210824	-0.0732577				531	-0.007	3134	-0.00673077	-0.0621417	0.0530209
532	-0.274	3139.9	-0.303321	-0.210947	-0.0698006				532	-0.011	3140	-0.0105769	-0.0618504	0.0488946
533	-0.27	3145.9	-0.298893	-0.21107	-0.0652364				533	-0.014	3146	-0.0134615	-0.0615591	0.0457299
534	-0.267	3151.9	-0.295572	-0.211193	-0.0617793				534	-0.017	3152.1	-0.0166186	-0.0612677	0.0432746
535	-0.264	3157.9	-0.292251	-0.211316	-0.0583222				535	-0.02	3158.1	-0.0192308	-0.0609764	0.0394004
536	-0.26	3163.9	-0.287823	-0.211439	-0.053758				536	-0.024	3164.1	-0.0230769	-0.0606851	0.0352742
537	-0.257	3169.9	-0.284502	-0.211562	-0.0503009				537	-0.028	3170.1	-0.0269231	-0.0603938	0.0311479
538	-0.253	3175.9	-0.280074	-0.211684	-0.0457367				538	-0.031	3176.1	-0.0298077	-0.0601025	0.0279832
539	-0.249	3181.9	-0.275646	-0.211807	-0.0411726				539	-0.034	3182.1	-0.0326923	-0.0598112	0.0248184
540	-0.244	3187.9	-0.270111	-0.21193	-0.0355014				540	-0.036	3188.1	-0.0346154	-0.0595199	0.0226153
541	-0.241	3193.9	-0.26679	-0.212053	-0.0320443				541	-0.039	3194.1	-0.0375	-0.0592285	0.0194505
542	-0.238	3199.9	-0.263469	-0.212176	-0.0285872				542	-0.043	3200.1	-0.0413462	-0.0589372	0.0153243
543	-0.234	3205.9	-0.259041	-0.212299	-0.024023				543	-0.045	3206.1	-0.0432692	-0.0586459	0.0131211
544	-0.23	3211.9	-0.254613	-0.212422	-0.0194589				544	-0.047	3212.1	-0.0451923	-0.0583546	0.0109179
545	-0.227	3217.9	-0.251292	-0.212545	-0.0160017				545	-0.05	3218.1	-0.0480769	-0.0580633	0.00775317
546	-0.224	3223.9	-0.24797	-0.212668	-0.0125446				546	-0.051	3224.1	-0.0490385	-0.057772	0.00651152
547	-0.219	3229.9	-0.242435	-0.212791	-0.00687344				547	-0.053	3230.1	-0.0509615	-0.0574807	0.00430833
548	-0.216	3235.9	-0.239114	-0.212914	-0.0034163				548	-0.056	3236.1	-0.0538462	-0.0571894	0.00114361
